# Supplementary material for: Screening methods for detection of ancient Mycobacterium tuberculosis complex fingerprints in next-generation sequencing data derived from skeletal samples
Source: PubMed Central journal article supplement (PMC6586198; doi:10.1093/gigascience/giz065), 2019-06-20
Supplement: giz065_giga-d-19-00014_original_submission.pdf [file giz065_giga-d-19-00014_original_submission.pdf]

## Screening methods for detection of ancient Mycobacterium tuberculosis complex fingerprints in NGS data derived from skeletal samples

--Manuscript Draft--

|                                                      |                                                                                                                                                                                                                                                                                                                                                                                                                                                                                                                                                                                                                                                                                                                                                                                                                                                                                                                                                                                                                                                                                                                                                                                                                                                                                                                                                                                                                                                                                                                                                                                                                                                                                                                                                                                                 |                       |
|------------------------------------------------------|-------------------------------------------------------------------------------------------------------------------------------------------------------------------------------------------------------------------------------------------------------------------------------------------------------------------------------------------------------------------------------------------------------------------------------------------------------------------------------------------------------------------------------------------------------------------------------------------------------------------------------------------------------------------------------------------------------------------------------------------------------------------------------------------------------------------------------------------------------------------------------------------------------------------------------------------------------------------------------------------------------------------------------------------------------------------------------------------------------------------------------------------------------------------------------------------------------------------------------------------------------------------------------------------------------------------------------------------------------------------------------------------------------------------------------------------------------------------------------------------------------------------------------------------------------------------------------------------------------------------------------------------------------------------------------------------------------------------------------------------------------------------------------------------------|-----------------------|
| <b>Manuscript Number:</b>                            | GIGA-D-19-00014                                                                                                                                                                                                                                                                                                                                                                                                                                                                                                                                                                                                                                                                                                                                                                                                                                                                                                                                                                                                                                                                                                                                                                                                                                                                                                                                                                                                                                                                                                                                                                                                                                                                                                                                                                                 |                       |
| <b>Full Title:</b>                                   | Screening methods for detection of ancient Mycobacterium tuberculosis complex fingerprints in NGS data derived from skeletal samples                                                                                                                                                                                                                                                                                                                                                                                                                                                                                                                                                                                                                                                                                                                                                                                                                                                                                                                                                                                                                                                                                                                                                                                                                                                                                                                                                                                                                                                                                                                                                                                                                                                            |                       |
| <b>Article Type:</b>                                 | Research                                                                                                                                                                                                                                                                                                                                                                                                                                                                                                                                                                                                                                                                                                                                                                                                                                                                                                                                                                                                                                                                                                                                                                                                                                                                                                                                                                                                                                                                                                                                                                                                                                                                                                                                                                                        |                       |
| <b>Funding Information:</b>                          | Ministerstwo Nauki i Szkolnictwa Wyższego (DIR/WK/2017/01)                                                                                                                                                                                                                                                                                                                                                                                                                                                                                                                                                                                                                                                                                                                                                                                                                                                                                                                                                                                                                                                                                                                                                                                                                                                                                                                                                                                                                                                                                                                                                                                                                                                                                                                                      | Dr Dominik Strapagiel |
|                                                      | Operational Programme Digital Poland (02.03.01-00-0012/17-00)                                                                                                                                                                                                                                                                                                                                                                                                                                                                                                                                                                                                                                                                                                                                                                                                                                                                                                                                                                                                                                                                                                                                                                                                                                                                                                                                                                                                                                                                                                                                                                                                                                                                                                                                   | Mr Błażej Marciniak   |
| <b>Abstract:</b>                                     | <p><b>Background</b></p> <p>Recent advances in ancient DNA (aDNA) studies, especially in increasing isolated DNA yields and quality, opened the possibility of analysis of ancient host microbiome. However, this analysis could lead to numerous pitfalls, including spurious identification of pathogens based on fragmentary data or environmental contamination, leading to incorrect epidemiological conclusions. Within the Mycobacterium genus, MTBC (Mycobacterium tuberculosis complex) members responsible for tuberculosis share up to ~99% genomic sequence identity, while other more distantly related MOTT (Mycobacteria other than tuberculosis) can be causative agents for pulmonary diseases or soil dwellers. Therefore, reliable determination of species complex is highly relevant for interpretation of sequencing results.</p> <p><b>Results</b></p> <p>Here we present a novel bioinformatical approach, used for screening of ancient tuberculosis in sequencing data, derived from 28 individuals (dated 4400 - 4000 BC and 3100 - 2900 BC) from Central Poland. We demonstrate that cost effective next generation sequencing data (c.a 20M reads per sample) could yield enough information to provide statistically supported identification of probable ancient disease cases.</p> <p><b>Conclusions</b></p> <p>Application of appropriate bioinformatic tools, including an unbiased selection of genomic alignment targets for species specificity, makes it possible to extract valid data from full-sample sequencing results (without subjective targeted enrichment procedures). This approach broadens the potential scope of paleoepidemiology both to older, suboptimally preserved samples and to pathogens with difficult intrageneric taxonomy.</p> |                       |
| <b>Corresponding Author:</b>                         | Dominik Strapagiel<br>University of Lodz<br>Lodz, POLAND                                                                                                                                                                                                                                                                                                                                                                                                                                                                                                                                                                                                                                                                                                                                                                                                                                                                                                                                                                                                                                                                                                                                                                                                                                                                                                                                                                                                                                                                                                                                                                                                                                                                                                                                        |                       |
| <b>Corresponding Author Secondary Information:</b>   |                                                                                                                                                                                                                                                                                                                                                                                                                                                                                                                                                                                                                                                                                                                                                                                                                                                                                                                                                                                                                                                                                                                                                                                                                                                                                                                                                                                                                                                                                                                                                                                                                                                                                                                                                                                                 |                       |
| <b>Corresponding Author's Institution:</b>           | University of Lodz                                                                                                                                                                                                                                                                                                                                                                                                                                                                                                                                                                                                                                                                                                                                                                                                                                                                                                                                                                                                                                                                                                                                                                                                                                                                                                                                                                                                                                                                                                                                                                                                                                                                                                                                                                              |                       |
| <b>Corresponding Author's Secondary Institution:</b> |                                                                                                                                                                                                                                                                                                                                                                                                                                                                                                                                                                                                                                                                                                                                                                                                                                                                                                                                                                                                                                                                                                                                                                                                                                                                                                                                                                                                                                                                                                                                                                                                                                                                                                                                                                                                 |                       |
| <b>First Author:</b>                                 | Paulina Borówka                                                                                                                                                                                                                                                                                                                                                                                                                                                                                                                                                                                                                                                                                                                                                                                                                                                                                                                                                                                                                                                                                                                                                                                                                                                                                                                                                                                                                                                                                                                                                                                                                                                                                                                                                                                 |                       |
| <b>First Author Secondary Information:</b>           |                                                                                                                                                                                                                                                                                                                                                                                                                                                                                                                                                                                                                                                                                                                                                                                                                                                                                                                                                                                                                                                                                                                                                                                                                                                                                                                                                                                                                                                                                                                                                                                                                                                                                                                                                                                                 |                       |
| <b>Order of Authors:</b>                             | Paulina Borówka                                                                                                                                                                                                                                                                                                                                                                                                                                                                                                                                                                                                                                                                                                                                                                                                                                                                                                                                                                                                                                                                                                                                                                                                                                                                                                                                                                                                                                                                                                                                                                                                                                                                                                                                                                                 |                       |

|                                                                                                                                                                                                                                                                                                                                                                                                                                                                                                                                     |                           |
|-------------------------------------------------------------------------------------------------------------------------------------------------------------------------------------------------------------------------------------------------------------------------------------------------------------------------------------------------------------------------------------------------------------------------------------------------------------------------------------------------------------------------------------|---------------------------|
|                                                                                                                                                                                                                                                                                                                                                                                                                                                                                                                                     | Lukasz Pułaski            |
|                                                                                                                                                                                                                                                                                                                                                                                                                                                                                                                                     | Błażej Marciniak          |
|                                                                                                                                                                                                                                                                                                                                                                                                                                                                                                                                     | Beata Borowska-Strugińska |
|                                                                                                                                                                                                                                                                                                                                                                                                                                                                                                                                     | Jarosław Dziadek          |
|                                                                                                                                                                                                                                                                                                                                                                                                                                                                                                                                     | Elżbieta Żądzińska        |
|                                                                                                                                                                                                                                                                                                                                                                                                                                                                                                                                     | Wiesław Lorkiewicz        |
|                                                                                                                                                                                                                                                                                                                                                                                                                                                                                                                                     | Dominik Strapagiel        |
| <b>Order of Authors Secondary Information:</b>                                                                                                                                                                                                                                                                                                                                                                                                                                                                                      |                           |
| <b>Additional Information:</b>                                                                                                                                                                                                                                                                                                                                                                                                                                                                                                      |                           |
| <b>Question</b>                                                                                                                                                                                                                                                                                                                                                                                                                                                                                                                     | <b>Response</b>           |
| Are you submitting this manuscript to a special series or article collection?                                                                                                                                                                                                                                                                                                                                                                                                                                                       | No                        |
| <p><b>Experimental design and statistics</b></p> <p>Full details of the experimental design and statistical methods used should be given in the Methods section, as detailed in our <a href="#">Minimum Standards Reporting Checklist</a>. Information essential to interpreting the data presented should be made available in the figure legends.</p> <p>Have you included all the information requested in your manuscript?</p>                                                                                                  | Yes                       |
| <p><b>Resources</b></p> <p>A description of all resources used, including antibodies, cell lines, animals and software tools, with enough information to allow them to be uniquely identified, should be included in the Methods section. Authors are strongly encouraged to cite <a href="#">Research Resource Identifiers</a> (RRIDs) for antibodies, model organisms and tools, where possible.</p> <p>Have you included the information requested as detailed in our <a href="#">Minimum Standards Reporting Checklist</a>?</p> | Yes                       |
| <b>Availability of data and materials</b>                                                                                                                                                                                                                                                                                                                                                                                                                                                                                           | Yes                       |

All datasets and code on which the conclusions of the paper rely must be either included in your submission or deposited in [publicly available repositories](#) (where available and ethically appropriate), referencing such data using a unique identifier in the references and in the “Availability of Data and Materials” section of your manuscript.

Have you have met the above requirement as detailed in our [Minimum Standards Reporting Checklist](#)?

## Screening methods for detection of ancient *Mycobacterium tuberculosis* complex fingerprints in NGS data derived from skeletal samples

Paulina Borówka<sup>1</sup>, Łukasz Pułaski<sup>2,3</sup>, Błażej Marciniak<sup>4,5</sup>, Beata Borowska-Strugińska<sup>1</sup>, Jarosław Dziadek<sup>3</sup>, Elżbieta Żądzińska<sup>1</sup>, Wiesław Lorkiewicz<sup>1,#</sup>, Dominik Strapagiel<sup>4,5,#</sup>

1 Department of Anthropology, Faculty of Biology and Environmental Protection, University of Lodz, 90-237 Łódź, Poland;

2 Department of Molecular Biophysics, Faculty of Biology and Environmental Protection, University of Lodz, 90-237 Łódź, Poland;

3 Institute of Medical Biology, Polish Academy of Sciences, 93-232 Łódź, Poland;

4 Biobank Lab, Faculty of Biology and Environmental Protection, Department of Molecular Biophysics, University of Lodz, 90-231 Łódź, Poland;

5 BBMRI.pl Consortium, 54-066 Wrocław, Poland.

Corresponding author:

Dominik Strapagiel, Biobank Lab, Department of Molecular Biophysics, Faculty of Biology and Environmental Protection, University of Lodz, Pilarskiego 14, 90-231 Łódź, Poland, +48426655702, dominik.strapagiel@biol.uni.lodz.pl

Wiesław Lorkiewicz, Department of Anthropology, Faculty of Biology and Environmental Protection, University of Lodz, 90-237 Łódź, Poland, +48426354456, wieslaw.lorkiewicz@biol.uni.lodz.pl

### Abstract

**Background:** Recent advances in ancient DNA (aDNA) studies, especially in increasing isolated DNA yields and quality, opened the possibility of analysis of ancient host microbiome. However, this analysis could lead to numerous pitfalls, including spurious identification of pathogens based on fragmentary data or environmental contamination, leading to incorrect epidemiological conclusions. Within the *Mycobacterium* genus, MTBC (*Mycobacterium tuberculosis* complex) members responsible for tuberculosis share up to ~99% genomic sequence identity, while other more distantly related MOTT (*Mycobacteria* other than *tuberculosis*) can be causative agents for pulmonary diseases or soil dwellers. Therefore, reliable determination of species complex is highly relevant for interpretation of sequencing results.

**Results:** Here we present a novel bioinformatical approach, used for screening of ancient tuberculosis in sequencing data, derived from 28 individuals (dated 4400 - 4000 BC and 3100 - 2900 BC) from Central Poland. We demonstrate that cost effective next generation screening sequencing data (c.a 20M reads per sample) could yield enough information to provide statistically supported identification of probable ancient disease cases.

**Conclusions:** Application of appropriate bioinformatic tools, including an unbiased selection of genomic alignment targets for species specificity, makes it possible to extract valid data from full-sample sequencing results (without subjective targeted enrichment procedures). This approach broadens the potential scope of paleoepidemiology both to older, suboptimally preserved samples and to pathogens with difficult intrageneric taxonomy.

### Keywords

ancient DNA, aTB, ancient tuberculosis, NGS

1  
2  
3  
4  
5  
6  
7  
8  
9  
10  
11  
12  
13  
14  
15  
16  
17  
18  
19  
20  
21  
22  
23  
24  
25  
26  
27  
28  
29  
30  
31  
32  
33  
34  
35  
36  
37  
38  
39  
40  
41  
42  
43  
44  
45  
46  
47  
48  
49  
50  
51  
52  
53  
54  
55  
56  
57  
58  
59  
60  
61  
62  
63  
64  
65

## 17 **Background**

18 A rapid population growth initiated in Neolithic period, connected with domestication of animals and increase of human sedentism,  
19 played a key role in pathogen transmission within the so-called first epidemiological transition[1-4]. The identification of infectious diseases and  
20 selection of unique fingerprints of their causative agents, especially those derived from skeletal elements, are still of the greatest interest for  
21 paleopathologists and anthropologists, which is evidenced by the range of available analysis methods. Members of *Mycobacterium tuberculosis*  
22 complex (MTBC) are genetically very closely related and are causative agents for one of the oldest human infectious diseases – tuberculosis  
23 (TB). It is a disease that may leave lesions on patients' bones, enabling a diagnosis based on bone morphology [5]. The main problem of  
24 paleopathological diagnoses based solely on dry bones is that there are no pathognomonic skeletal indicators of TB. The most reliable skeletal  
25 indicator of TB are destructive lesions in thoracic and lumbar spine sections, which in advanced disease stage lead to destruction and collapse of  
26 vertebral bodies, resulting in spinal kyphosis, or gibbus, known as Pott's disease [5, 6]. However, many other conditions, like chronic pyogenic  
27 osteomyelitis, *Brucella* osteomyelitis, fungal infections, typhoid spine, vertebral fractures, septic, traumatic, and rheumatoid arthritis, malignant  
28 bone tumors can all affect the spine and produce similar pathological conditions which are difficult to distinguish from tuberculosis in  
29 paleopathological practice [7, 8]. Diagnoses based on other types of bone lesions are even more tentative; these are primarily based on  
30 osteomyelitis of the joints (most commonly the hip and knee, but also ankle and elbow) and periosteal reactive lesions (mainly in the ribs or  
31 diaphysis of the long bones, including tubular bones of the hands and feet in children [6, 8]. Lastly, morphological studies of bones do not permit  
32 detection of many individuals affected with TB in past human populations: data from the pre-antibiotic era show that bone changes occur only in  
33 about 3–7% of individuals with active TB [8].

34 Since the 1990s, new possibilities to diagnose TB in archaeological specimens have arisen, offered by the detection and analysis of  
35 mycobacterial DNA and other biomolecules specific to MTBC at the molecular level [9-20]. A common complication in molecular studies for  
36 ancient MTBC detection is the presence of DNA and other metabolites from the whole microbiome of the individual whose remains are being  
37 analysed as well as from environmental bacteria that have colonised the skeleton *post-mortem* [21, 22]. These contaminants might include  
38 Mycobacteria other than *M. tuberculosis* (MOTT), some of which are prevalent in the environment, while others are associated with clinical  
39 cases of non-tuberculosis diseases [21, 23-25]. It should be emphasized that members of *Mycobacterium tuberculosis* complex themselves are  
40 characterized by a particular high sequence similarity [26, 27], which leads to often unsurmountable difficulties in distinguishing them on the  
41 molecular level.

42 Detection of cell wall components such as mycolic, mycocerosic and mycolipenic acids [12, 14, 17, 18] with matrix-assisted laser  
43 desorption/ionization tandem time of flight (MALDI-TOF) which present profiles specific for MTBC is considered a reliable method to identify  
44 ancient causative agents in human archaeological samples. On the other hand, initial attempts to use mass spectrometry to detect cell wall lipids  
45 were shown to be erroneous in some cases [14, 28, 29]. Polymerase chain reaction, followed by gel electrophoresis, is still a popular method for  
46 detection of MTBC ancient DNA in human samples such as bones and teeth [30-32], mummified soft tissues [33, 34], or calcified pleura [9].  
47 Known cases of tuberculosis disease proven on the basis of ancient DNA derived from human material are old as 9000 BC [35], through Iron  
48 Age [36] and up to modern times [37]. However, PCR-based methods have not been without controversy due to the possibility of cross-  
49 contamination as well as limitations of selection of proper sequences. While repetitive insertion sequences, e.g. IS6110 and IS1081, are widely  
50 used and sometimes considered as a biomarker specific to MTBC bacteria [32], the current consensus recommends strong caution in their use  
51 due to their presence in MOTT bacteria. Those commonly used markers have even been found to occur in soil mycobacteria [38-43], and even  
52 weak homology can cause false-positive PCR results for unrelated microbes [38, 44].

53 Recently, next generation sequencing (NGS) methods were introduced for detection of causative agents of ancient diseases [45, 46],  
54 including MTBC, with or without pre-enrichment of MTBC aDNA [47-50]. The increasing amount of data generated by NGS and efficiency of  
55 non-Sanger-based sequencing platforms requires a new approach in processing tools: suitable bioinformatic pipelines are required for reliable  
56 DNA analysis of ancient causative agents. Similar to PCR, where the use of only short conserved regions considered as specific for MTBC may  
57 lead to false positive results, improper analysis of NGS data can misinterpret sequences from modern known or unknown environmental  
58 *Mycobacteria* which are present in ancient human skeletons [25]. New analytical tools for more unequivocal answers to questions of  
59 identification and differentiation of *ante-mortem* causative from *post-mortem* non-causative microbial agents are urgently needed. Application of  
60 specifically designed *in silico* (bioinformatical approach) verification methods for improved downstream processing of molecular fingerprint  
61 data from ancient samples is necessary for drawing conclusions on clinical prevalence and epidemiology of pathogenic mycobacteria in history.  
62 Here we present an improved strategy for specific identification of bacteria from the *M. tuberculosis* complex in ancient non-enriched NGS data.  
63 Main purpose of this study was to design an unbiased genomic marker alignment query composed of sequences belonging strictly to MTBC  
64 members. Subsequently, appropriate bioinformatic alignment algorithms and statistical tools allow the identification of tuberculosis causative  
65 agents, using fragment length variation to balance selectivity (species specificity) with sensitivity of detection.

## 66 **Sample Description**

67 Ancient bone samples come from skeletal remains of 28 individuals representing two Neolithic populations from the Kujawy region in  
68 Central Poland: the Middle Neolithic Brześć Kujawski Group of the Lengyel culture (BKG), dated to ca. 4400-4000 BC (26 individuals) and the  
69 Late Neolithic Globular Amphora culture (GAC), dated to ca. 3100-2900 BC (2 individuals), previously described in [17, 51] (Supplementary  
70 Tab. 1). The skeletons come from two archaeological sites, BK 3 and BK 4, which represent relics of a settlement and cemetery of the BKG  
71 culture with some secondary objects within them, like the GAC grave. Both sites overlap each other, thus soil conditions and diagenetic agents  
72 were similar for all skeletal remains analyzed. Bone material was taken mainly from vertebral bodies of individuals with well-preserved  
73 skeletons. One of two individuals belonging to GAC reveals bone lesions which are consistent with Pott's disease. BKG samples provided more  
74 ambiguous evidences of skeletal lesions. One individual shows destructive lesions of the thoracic and lumbar vertebrae with central collapse of  
75 the vertebral bodies which may indicate tuberculous spondylodiscitis. Three other individuals of this population reveal only relatively mild and  
76 nonspecific inflammatory bone changes in the postcranial skeleton which were located on the internal surface of the ribs, tibia and femur shafts,  
77 as well as foot bones.

## 78 **Analyses**

### 79 **Reference target construction (alignment target)**

80 As our main reference sequence, we used the most commonly applied modern laboratory strain of *M. tuberculosis* (MTB), H37Rv, for  
81 which the whole genomic sequence is available. In order to select a subset of this reference sequence as an alignment target providing enhanced  
82 specificity for tuberculosis-causing agents (MTBC members), we first derived a set of all protein-coding sequences (CDS) from the H37Rv  
83 genome using the RAST tool [52]. These 4,360 sequences were screened using the BLAST tool (Megablast) at the National Library of Medicine  
84 sequentially against 12 available genomic sequences of selected MOTT: *M. kansasii*, *M. avium* subsp. *paratuberculosis*, *M. ulcerans*, *M.*  
85 *smegmatis*, *M. fortuitum*, *M. haemophilum*, *M. marinum*, *M. simiae*, *M. asiaticum*, *M. xenopi*, *M. phlei*, *M. abscessus*. Any detected similarities  
86 (gapless alignments >10 bp) between a H37Rv CDS and any MOTT genomic sequences resulted in the exclusion of this CDS from the result  
87 dataset, which was therefore restricted to sequences fully specific for MTBC, having no homologs in any MOTT genome. The resulting set of  
88 sequences was subsequently called the Borówka et al. alignment target and consisted of 1,534 coding sequences with total sequence length of  
89 0.814 Mbp. Since no sequences from other MTBC species were used at this stage, and it is known that they exhibit up to 99.9% nucleotide

90 sequence similarity [53], the constructed alignment target cannot be considered specific only for *M. tuberculosis*, but rather for the whole  
91 MTBC; this is justified in epidemiological studies on ancient samples by the need to include all clinically equivalent causative agents for the  
92 same disease entity: tuberculosis. For comparison purposes, we prepared and used two literature-derived, knowledge-based H37Rv sequence  
93 subsets as alternative alignment targets: the c. 0.046 Mbp sequence used for capture enrichment in Bouwman et al. (2012) [50] for sequencing  
94 mycobacterial samples from a 19th century skeleton, subsequently called the Bouwman et al. alignment target, and the two genes (*katG* and  
95 *mpt40*, total length 0.004 Mbp) listed as MTBC-specific among the capture enrichment probes used by Bos et al. (2014) [48] for sequencing  
96 mycobacterial samples from 11th-13th century Peruvian skeletons, subsequently called the Bos et al. alignment target. All the reference  
97 sequences were prepared for alignment by indexing with the suffix array - induced sorting algorithm, implemented in the BWA software  
98 package (BWA).

99 Since the construction of the Borówka et al. alignment target was based on elimination of sequences similar to other mycobacterial  
100 species, we reasoned that the performance of an alignment target is directly linked to amount of similarities between the MTB genome and other  
101 potentially interfering mycobacterial species (both ancient and environmental) present in the ancient host-derived sample. In order to quantify  
102 this, we subjected the publicly available genome sequences of *Mycobacterium* species to an *in-silico* procedure to generate collections of short  
103 sequences broadly analogous to authentic NGS reads. Since including reads below a certain length threshold in similarity analysis of ancient  
104 microbial DNA leads to non-specific matches (for both evolutionary and statistical reasons); this threshold is usually arbitrarily assumed around  
105 30 bp, but a broader analysis might make it easier to construct a reliable algorithm for detection of specific ancient pathogens. Therefore, in our  
106 further analysis both of reference and authentic ancient NGS sequences we extracted groups (bins) of non-human sequences over several length  
107 thresholds:  $\geq 20$ bp,  $\geq 25$ bp,  $\geq 30$ bp and  $\geq 35$ bp, to enable a thorough analysis of specificity gain upon increase in minimal sequence length. For  
108 reference *Mycobacterium* genomes, k-mers of specified length (corresponding to the lower limit of read length for NGS bins: 20, 25, 30 or 35)  
109 were filtered against the human genome assembly hg19, and the resulting "short read" collections were aligned to the full MTB reference  
110 genome or its selected subsets (Borówka et al., Bouwman et al. and Bos et al. alignment targets). Table 1 shows the respective number of  
111 genomic k-mers from MTB complex and MOTT species which match the MTBC alignment targets as well as the total lengths of assayed  
112 genomes for comparison. Since the various subsets of the MTB genome differ in length and thus the probability of random match increases with  
113 target length, we standardised the obtained data by presenting it as percentage of k-mers from a given mycobacterial genome that match the  
114 alignment target, divided by the ratio of target length to the full MTB genome length (genomic coverage of the target). These values, which are  
115 an inverse measure of alignment target specificity (they increase if more "reads" from a species which is not MTB or MTBC can be mistaken for  
116 MTBC), are shown in Table 1. As a reference, the MTB genome itself was also subjected to this procedure - obviously, the match percentage  
117 values are almost 100% here. Several conclusions can be drawn from these data: firstly, it is obvious that selecting longer reads (in this case  
118 longer k-mers) for comparison increases specificity, with reads 30 bp long or longer optimal for specific identification of the MTB complex,  
119 reflecting a common consensus in the field. However, it is important to note that shorter reads still add important information to the analysis, as  
120 the rate of specificity increase (decrease in matching read percentage with increase in read length) varies between species (i.e. some species have  
121 longer stretches of highly similar sequence to MTB). For example, while *M. smegmatis* has a very high match percentage to the Borowka et al.  
122 alignment target at low read length, this is rapidly lost at longer (more genuine) read lengths; the opposite is true e.g. for *M. marinum*. It is a  
123 derivation of the evolutionary history of the genus, but in this case also a practical caveat for further interpretation of sequence matches in actual  
124 aDNA samples. Moreover, the specificity of various alignment targets varies, with the Borówka et al. target being consistently the most specific  
125 (for longer k-mers) for distinguishing MOTT, while it is (by design) not well suited to distinguishing other members of the MTB complex from  
126 MTB itself.

127 Since we intended to develop a highly specific screening test (based on low depth sequencing strategy) for verification of MTBC  
128 infection in Neolithic samples with *a priori* relatively low degree of aDNA preservation, we decided on a statistical approach. Since any

129 preserved ancient mycobacterial DNA would be only a fraction of total aDNA, and it in turn would only be a fraction of total reads (the balance  
130 being modern environmental metagenome), a balance between sensitivity and specificity in verifying this very low number of reads must be  
131 struck. In sedentary, communal populations MTBC infection tends to be epidemic in character, but in most individuals with latent infection the  
132 microbial load (and thus the probability of DNA survival in ancient samples) is relatively low and constant. Any similarity analysis based on  
133 sequence alignment will also invariably generate false positive alignment hits, thus, it would be impossible to construct a test with sufficient  
134 statistical power to distinguish individuals genuinely free of ancient MTBC and those with average/modest latent infection. Therefore, we  
135 concentrated on the detection of outlier individuals with high microbial load (which may be later selected for enrichment-based further genetic  
136 analysis, such as phylogenetic studies or genome reconstruction), measured by the positive read ratio (the intrinsically very low ratio of reads  
137 matching the MTBC alignment target to all eligible reads). Based on the epidemiology of MTBC infection, we assumed a quasi-normal  
138 distribution of positive read ratios in a randomly selected sample of ancient individuals, with outliers as candidates for active tuberculosis and for  
139 selection for more in-depth studies. Thus, our method was based on standardising read ratio values to normal distribution parameters (arithmetic  
140 mean and standard deviation) and, as a further step in the detection algorithm for aTb, we applied a typical cutoff value of 1.5xSD to detect  
141 outliers.

142 As a first stage of testing our screening approach on actual NGS data from ancient material, we used a control dataset based on published

143 NGS results of confirmed tuberculosis-infected individuals - 18th/19th-century mummified bodies from a crypt in Vác, Hungary, described by  
144 Kay et al. (2015) [46]. The aim of Kay et al. was to reconstruct and analyse historical genome sequences of *M. tuberculosis*, which resulted in  
145 sequencing results with high coverage. Since all these samples (26 bodies) were previously demonstrated by PCR to come from infected  
146 individuals [54], application of our screening procedure did not aim at distinguishing "positive" from "negative" samples, but at validating the  
147 selection of individuals with highest microbial load (especially since some of them were sampled from 1-3 different parts of the body), at the  
148 same time enhancing specificity (vs. MOTT). We used the Kay et al. dataset for verification of specificity of all applied alignment targets:  
149 Borówka et al., Bouwman et al., Bos et al. and the whole genome sequence of *M. tuberculosis* H37Rv, with our algorithm aimed at detection of  
150 strongest aTb outliers. While application of the Borówka et al. target sequence (with 30 bp read length cutoff) detected four samples as outliers,  
151 they turned out to belong only to two individuals (bodies 68 and 92) (Supplementary Tab. 2). This validated our approach as a suitable method  
152 for selecting ancient samples with highest MTBC genetic material content, especially since, despite our alignment target consisting only of  
153 sequences specific exclusively for MTBC, it turned out that those four samples were also those that showed the highest ratio of aligned reads to  
154 the full *M. tuberculosis* reference sequence (and thus the highest number of reads used to reconstruct the ancient genome) in the original study  
155 by Kay et al. (shown there in Supplementary Tab. 2). Moreover, only the two alignment targets prepared with both specificity and sensitivity in  
156 mind (Borówka et al. and Bouwman et al.) led to identification of all three samples from body 68 as outliers.

157 Subsequently, we applied the full statistical approach (with all four NGS read length bins) and the four selected genomic  
158 alignment targets: full reference *Mycobacterium tuberculosis* H37Rv genome (broadest possible target), two published targets consisting of  
159 rationally selected genes (applied previously to enrichment-based sequencing: Bouwman et al. and Bos et al.) as well as the novel specificity-  
160 tailored target (Borówka et al.), to the Neolithic samples from Brześć Kujawski. Table 2 presents the number of reads in each read length bin  
161 used for alignment with targets and statistical analysis, while Supplementary Tables 3-6 show the alignment results as numbers and ratios of  
162 matching reads. Fig. 1 presents the results of statistical analysis as outlying standardised ratio values in different read length bins. Overall, the  
163 expected population structure of majority of individuals with few positive reads and outlier individuals with an exceptional number of positive  
164 reads is confirmed. However, it is immediately obvious that the composition of outlier individuals depends strongly not only on the genomic  
165 alignment target, but also on minimum length of reads used for the alignment. There are individuals who remain positive (with a high relative  
166 ratio of reads aligning to the respective target) for all four length bins (e.g. 4\_BK4 for the *Mycobacterium tuberculosis* H37Rv target), i.e. the  
167 share of putative MTBC-derived sequences remains constant despite the decrease in number of analysed sequences and increase in sequence



168 complexity. There are individuals who, despite being outliers for the bins including shorter reads, lose this status for the more restrictive bins  
169 (e.g. 55\_BK4 for the Borówka et al. target), i.e. the majority of their MTBC-like sequences were of low complexity. Contrastingly, in some  
170 individuals the share of MTBC-like sequences increases above the cut off value only for bins with longer reads (e.g. 31\_BK4 for the Borówka et  
171 al. target), i.e. most specifically aligned fragments are relatively long. It is again apparent that since most of this change concerns reads between  
172 20 and 29 bp in length, the optimal threshold for read aligning to a genomic target for specificity towards MTBC is  $\geq 30$  bp. Thus, the three  
173 individuals which exceed the threshold of 1.5xSD for the MTBC-specific Borówka et al. target (17\_BK4, 29\_BK4 and 31\_BK4) are considered  
174 with high probability to be ancient cases of MTBC infection and merit selection for further in-depth studies by a more cost-intensive approach.

175 Since the cut off-based detection algorithm, while robust for the presented dataset, may be less suitable for other, less homogenous  
176 groups of ancient individuals, we also set out to construct an objective, parametric testing-based outlier detection algorithm. Since the main  
177 objective of our overall study is specificity of MTBC detection, we applied this algorithm to the original Borówka et al. genomic alignment  
178 target. Based on the observation that positive read ratio tends to depend monotonically on read length bin – either consistently increasing or  
179 decreasing for outlier individuals – we decided to calculate a monotonicity parameter. We first standardised positive read ratios as percentage of  
180 average positive read ratio (without assumptions towards normal distribution, Supplementary Fig. 1) and then calculated ratios of these values  
181 for adjoining read length bins ( $\geq 25\text{bp}/\geq 20\text{bp}$ ,  $\geq 30\text{bp}/\geq 25\text{bp}$  and  $\geq 35\text{bp}/\geq 30\text{bp}$ ). The arithmetic mean of these values (Supplementary Tab. 7)  
182 depended on monotonicity of the studied relationship and had a normal distribution among individuals in our study. For outlier detection, we  
183 applied a one-tailed critical z value test on both tails on the sample. We consider the positive outliers (individuals with consistently increasing  
184 share of positively aligned reads with increasing read length) to be potential individuals with high MTBC loads, suitable for further analysis both  
185 by virtue of good mycobacterial genomic material preservation and high certainty of this material belonging to ancient MTBC. On the other  
186 hand, negative outliers may either be individuals with ancient MOTT infection (we suggest this as highly probable for 4\_BK4) or samples with  
187 high proportion of short, non-specific alignments, probably due to environmental contamination (most probably 55\_BK4) - to distinguish these  
188 two groups, a comparison with the more Mycobacterium-generic whole-genome alignment target is necessary (see below). This approach, while  
189 retaining the strong specificity of the cut off approach, gains increased sensitivity due to inclusion of individuals with high background of  
190 environmental sequences (low initial positive alignments in the short-read bin) which nevertheless retain specific long positively aligned  
191 sequences upon read length restriction, e.g. 21\_BK4.

192 One of immediately obvious results of our analysis was that the comparison of alignment targets constructed with different assumptions  
193 leads to surprisingly large differences in assignation of individuals. Aligning aDNA sequences versus the whole MTB genome results in  
194 identification of two strong outliers (4\_BK4 and 32\_BK4). The same two individuals are identified, albeit with a smaller divergence, by using  
195 the enrichment bait sequence set used by Bouwman et al. as alignment target. Since this subset of genomic sequences was originally selected for  
196 enrichment of lineage-distinguishing polymorphisms rather than for MTB complex specificity, this result is expected and confirms the efficiency  
197 of the outlier detection method and  $\geq 30\text{bp}$  as optimal read length. On the other hand, our Borówka et al. genomic subset selected on the basis of  
198 MTB complex specificity led to identification of three different individuals as outliers (17\_BK4, 29\_BK4 and 31\_BK4), while 4\_BK4 and  
199 32\_BK4 had positive read values close to average. This is even more conspicuous when positive ratio values for the two different alignment  
200 targets (whole genome and specific subset Borówka et al.) are plotted against each other (Fig. 2). In our opinion this points to the broadly  
201 recognized risk of mistakenly identifying ancient infections caused by MOTT as tuberculosis based on the extensive similarity between the  
202 respective mycobacterial genomes. While restricting the alignment target leads to loss of sensitivity due to unavoidable decrease of absolute  
203 number of aligned reads, which is a significant problem for ancient DNA, it is offset by the increase in specificity of detection. This distinction is  
204 crucial for epidemiological hypotheses where elimination of false positives is of paramount importance. We further show this by aligning our  
205 reads to the purportedly MTBC-specific target sequences selected by Bos et al. (sequences of only two *M. tuberculosis* specific genes), where  
206 increase of specificity leads to detection of the 29\_BK4 individual, but the extreme loss of sensitivity linked to minuscule absolute number of

207 reads (the highest number of positive reads in the  $\geq 30$ bp bin is 13 – see Supplementary Tab. 6) leads to high experimental noise and low  
208 reliability of assignment of individuals, and it is not recommended.

209 Since for two individuals which were strongly enriched in mycobacterial sequences (4\_BK4 and 32\_BK4) we posit the existence of an  
210 ancient MOTT infection (as they do not score highly in comparison with the specific Borówka et al. alignment target), we decided to verify if  
211 this assumption is supported by aligning the optimal read bin ( $\geq 30$ bp) to full genomes of other mycobacterial species as targets. Indeed, as seen  
212 in Supplementary Fig. 2, those two individuals are also strong outliers in read ratio values after aligning to the *M. marinum* genome - moreover,  
213 when plotted against read ratio values for the MTB genome, it is apparent that they show higher similarity to *M. marinum*, since they are located  
214 on the *M. marinum* side of the read ratio regression line. This finding validates our workflow in that it corroborates the usefulness of read length  
215 binning while further demonstrating the advantages of read aligning to targets selected for species discrimination (like the Borówka et al. target)  
216 which allow for immediate flagging of suspicious samples with spuriously high absolute similarity to the MTB genome. We have also attempted  
217 to verify the possibility of distinguishing samples with predominantly ancient mycobacterial sequences from samples with recent environmental  
218 MOTT contamination by performing mapDamage analysis. MapDamage analysis shows that the low absolute number of reads that map to all  
219 alignment targets (including the full MTB genome) in the case of our samples prevents us from drawing meaningful conclusions in this regard  
220 (even for the samples with highest read numbers - 4\_BK4, 32\_BK4, 17\_BK4, 29\_BK4, 31\_BK4). For confirmation of ancient status of analysed  
221 reads Mapdamage analysis were also performed and is presented in Supplementary Fig. 3 for individuals with potential MOTT and MTBC  
222 infections.

## 223 Discussion

224 Evolutionary and ecological complexity of mycobacteria, including the existence of a group of closely related pathogens known as  
225 *Mycobacterium tuberculosis* complex, a large number of more distantly related human and animal pathogens causing diseases other than  
226 tuberculosis, and an abundance of free-living (including soil- and water-borne) mycobacterial species in the environment all contribute to  
227 difficulty in unequivocal determination of ancient tuberculosis on the basis of MTBC aDNA. Present-day paleoepidemiology uses tools of  
228 classical biological anthropology as well as modern clinical diagnostics at the molecular level. Morphological diagnosis of tuberculosis is based  
229 on certain bone changes, especially those described as Pott's disease. This approach is not optimal from the point of view of sensitivity, since  
230 bone lesions are present only in 2% of all cases of tuberculosis infection and 10-20% of cases of extrapulmonary tuberculosis [39, 55].  
231 Specificity of this tool is also relatively low - bone lesions that mimic Pott's disease occurs in many other unrelated conditions. In spite of that  
232 limitations, osteological analysis is often the main starting point of a study and cannot be disregarded. However, in our study the occurrence of  
233 bone lesions that could be linked in any way with tuberculosis did not correlate with the results of our genetic analyses. There are two possible  
234 explanations for this fact. First, the bone changes were not caused by tuberculosis, which is in accordance with a lack of pathognomonic  
235 characteristics of the disease on the skeleton alone, as was clarified before; it applies primarily to the graves 12\_BK4, 18\_BK4, 47\_BK4, and  
236 73\_BK4. It may also be that the preservation of MTBC aDNA was too poor to pass the sensitivity/specificity threshold of the method proposed  
237 here.

238 Among molecular techniques which are used for diagnosis of ancient tuberculosis cases, both biochemical methods based on mass  
239 spectrometry and PCR amplification of marker sequences have been successfully used in literature, e.g. for preliminary description of the  
240 Hungarian mummies used subsequently to reconstruct aTB genomes [46, 54]. However, both these groups of methods suffer from a number of  
241 drawbacks which make them less useful in an ancient epidemiological context than in a contemporary one: environmental contamination from  
242 modern soil mycobacteria can overwhelm both traces of ancient MTBC mycolic acids and less specific PCR amplicons, while strong care must  
243 be taken to prevent in-lab cross-contamination with genuine MTBC samples. Therefore, NGS has a number of advantages in diagnosis of ancient  
244 tuberculosis, having the potential to be both highly sensitive and highly specific; but the balance between sensitivity and specificity depends on

245 the selection of reference genomic sequences and crucially on the method of alignment. Large amount of generated data allows potentially to  
246 detect ancient mycobacteria selectively, unequivocally and semi-quantitatively, while making possible additional analyses such as preservation  
247 period-related DNA damage pattern detection (e.g. mapDamage [56, 57], phylogenetic analysis of genetic kinship [48] or even full genome  
248 reconstruction [46]. Due to small absolute amounts of actual ancient pathogen DNA in most types of human body samples, a common approach  
249 is to use pre-sequencing enrichment (usually using probe capture, e.g. [48]). Only in bodies preserved in exceptional, isolated conditions, such as  
250 the Hungarian mummies from a 18th century crypt, was a non-enriched metagenomics approach used [46]. Use of enrichment techniques  
251 strongly increases sensitivity, but comes with its own drawbacks (apart from increased cost), the most relevant of which is the need to pre-design  
252 a set of sequences (probes or primers) that will define and limit the scope of subsequently obtained NGS data. A full metagenome approach is  
253 often more relevant when dealing with a highly ancient sample like in the present study, when neither the infection prevalence nor the pathogen  
254 identity are known to any precision and a preliminary NGS study is needed for formulation of specific hypotheses and pre-selection of  
255 individuals for further analysis.

256 However, in the case of ancient MTBC (especially samples as old as our material is), specificity is a more important consideration than  
257 sensitivity – in this case not so strongly with regard to modern MTBC contamination in the laboratory (which would not mask ancient data in a  
258 semi-quantitative study and would be obvious if DNA damage analysis were performed), but mainly with regard to ancient MOTT which can be  
1 259 unpredictably genetically similar to MTBC. The sources of these MOTT can be either soil contamination (including dead animals) which could  
2  
3  
4 260 have happened at any time since inhumation (preventing reliable elimination by DNA damage analysis), or actual ancient MOTT which were  
5  
6 261 pathogenic/infectious/commensal to ancient humans. Thus, the design of sequencing analysis workflow has to take into account the necessity to  
7  
8  
9 262 filter out unknown related sequences that are not derived from MTBC - this was the main rationale behind the design of our study. While  
10  
11 263 contamination with mycobacterial sequences within the laboratory (amplicons, genuine *Mycobacterium* DNA) can be prevented by correct  
12  
13  
14 264 workflow (separation of pre- and post-PCR areas etc.), equipment and strict procedures, contamination by environmental DNA is inescapable  
15  
16 265 and has to be taken into account in the case of archaeological bone samples preserved by inhumation. Since for ancient samples direct contact of  
17  
18  
19 266 bones with the environment has lasted for a very long time (unlike more recent samples from vault inhumation), mycobacterial DNA derived  
20  
21 267 from environmental (soil) MOTT can have undergone accretion in bones throughout this period, with some of it ancient enough to be  
22  
23  
24 268 indistinguishable in terms of location and state of preservation from DNA of infectious microbes buried with the body. All MTBC are obligate  
25  
26 269 pathogens and thus are an unlikely source of environmental contamination of ancient samples. Therefore, for preliminary identification of  
27  
28  
29 270 potentially interesting samples in ancient inhumated bones, specificity in methods of detection of ancient infectious agents from this group  
30  
31 271 should be developed towards exclusion of MOTT, with distinction between members of MTBC as a secondary, much less important goal. Since  
32  
33 272 MTBC also share a very high proportion of coding sequences, achieving specificity for *M. tuberculosis* s.s. could occur only by drastically  
34  
35  
36 273 limiting the size of the reference marker sequence, thus leading to very low sensitivity, especially for usually highly degraded aDNA. Moreover,  
37  
38 274 the division of MTBC into lineages is not entirely concordant with classical taxonomic division into species, so attempting an artificial  
39  
40  
41 275 distinction between some lineage groups based on accumulated NGS data would not be recommended. Our approach is designed as a relatively  
42  
43 276 low-cost, first-pass classification of ancient samples based on whole-metagenome NGS data. When a highly specific method like the one we  
44  
45  
46 277 propose is used to identify likely ancient MTBC infection, potential lineage determination or any other phylogenetic studies (in pre-selected  
47  
48 278 samples) should proceed by other methods developed specifically for this purpose, based on the presence of lineage-specific polymorphisms  
49  
50  
51 279 (with the caveat that enrichment for specificity-related sequences before NGS will certainly lead to loss of the majority of phylogenetically  
52  
53 280 important loci, so a full metagenomic sequencing round with sufficient coverage is inevitable).

54  
55 281 We postulate that a combination of read length-based genomic alignment analysis and a careful knowledge-based selection of the  
56  
57  
58 282 alignment target makes it possible to achieve relatively high specificity of aTB detection against all potential false positive sources. Therefore, a  
59  
60 283 robust tool for specifically identifying NGS-derived sequences that belong to ancient MTBC with high confidence is a priority task in molecular  
61  
62  
63  
64  
65

284 paleoanthropology. Even more relevant to paleoanthropological studies, confusion between MOTT and MTBC can lead to spurious  
285 identification of ancient individuals as tuberculosis sufferers or carriers, invalidating conclusions relevant to paleoepidemiology. We  
286 demonstrate that read length selection is not only highly relevant (as has been shown before and by us, only reads above ca. 30 bp can be used  
287 with high confidence), but when a statistics-based approach to multiple length thresholds is used, it can yield a substantial increase in specificity  
288 of MTBC identification. At the same time, selection of pre-filtered alignment target, with combined knowledge-based (selection of transcribed  
289 sequences) and automated (exclusion of sequences aligning with MOTT genomes) delineation of MTBC-specific sequences (which we call the  
290 Borówka et al. target), makes it possible to perform in-depth specificity analysis by comparing the alignments of *in silico* fragmented  
291 mycobacterial genomes (mimicking actual NGS data). Combining the novel alignment target and the read length binning approach, we were able  
292 to select with high confidence three ancient individuals with probable ancient MTBC infection and two further individuals with highly probably  
293 ancient mycobacteriosis caused by MOTT (which would be misidentified as tuberculosis if another alignment target or to short reads were taken  
294 into account). Of course the limitations of our data make these identifications preliminary and another round of directed (e.g. enrichment-based)  
295 sequencing would be required both for positive identification of the infectious agent and for potential phylogenetical analysis of its spatial and/or  
296 temporal kinship. However, in our case read length analysis allowed us to suggest *M. marinum* as the potential ancient infectious agent based on  
297 statistical analysis; obviously, positive confirmation of this diagnosis would require tools that are currently unavailable such as proven *M.*  
1 298 *marinum*-specific enrichment probes as well as a much better sequence coverage that could be achieved in a preliminary study (Supplementary  
2  
3  
4 299 Fig. 3). Still, this possible pathogen identification is not at odds with the archeological context as the inhumation site is next to a lake (Smetowo)  
5  
6 300 and within a geographical region rich in post-glacial lakes (Kujawy), so some individuals could have had routine professional contact with fish.  
7  
8 301 Our combined procedures are a robust specificity-boosting tools, but obviously cannot be treated as ultimate proof (neither for disproval or  
9  
10  
11 302 confirmation of tuberculosis infection). Our samples are relatively old (in comparison to most other ancient tuberculosis cases studied by  
12  
13  
14 303 molecular means before) and thus the absolute read numbers from an unbiased NGS approach is low. We demonstrate that this disadvantage  
15  
16 304 makes it e.g. difficult to perform DNA damage analysis. However, we provide a consistent proof of concept for a tool which would allow  
17  
18  
19 305 relatively cheap and unbiased selection of samples (e.g. individuals) for further analysis, e.g. by enrichment capture NGS. Thus, we suggest that  
20  
21 306 it is possible to use global NGS results from ancient samples as an economical pre-screening tool for more complex methods, while applying  
22  
23  
24 307 bioinformatic tools to maximise the number of reliable conclusions that can be drawn from a limited dataset.  
25  
26  
27  
28  
29  
30  
31  
32

## 33 308 **Methods**

### 34 309 **Ancient DNA extractions**

35  
36 310 The procedures of sample preparation were conducted in sterile and dedicated ancient DNA sample preparation facility at University of  
37  
38  
39 311 Lodz, with all standard precautions taken to avoid sample contamination. All disposable materials, buffers, water, clean room surfaces and bone  
40  
41  
42 312 material, were UV-irradiated for min. 30 minutes before any proceeding steps. The fragments of bone material were isolated using Dremel disks,  
43  
44  
45 313 (USA), surface-cleaned, UV-irradiated for 7.5 minutes on each side, and ground into a fine powder, further used for DNA extraction procedures  
46  
47  
48 314 following the protocol of Dabney et al. with modifications [58-60]. Ancient DNA was successfully isolated from all bone samples (See  
49  
50  
51 315 Supplementary Fig. 3). Illumina libraries were prepared in separate facility, according to Meyer et al. protocol [61] without UDG treatment of  
52  
53 316 the samples. All libraries were subjected to the screening next-generation sequencing on the Illumina Nextseq 500 platform (100bp single-end  
54  
55  
56 317 sequencing), yielding between 2.2 and 33.9 million reads per individual (median number of reads after incomplete and truncated read trimming –  
57  
58 318 16.9 million reads per individual, Tab. 2). This dataset contains ancient human sequences from the deceased individuals, ancient microbial  
59  
60  
61  
62  
63  
64  
65

319 sequences from parasites, pathogens, commensals or symbionts of the deceased individuals, as well as genomic sequences from environmental  
320 organisms (mainly microbes, but also potentially higher Eukaryotes), to which the skeletal remains were exposed *post-mortem*.

### 321 **Bioinformatical procedures**

322 Raw NGS reads were subjected to standard quality processing such as trimming and adapter sequence removal (-q 30 --phred33 --  
323 illumina --length 20), using the Trim Galore! software package [62]. Since the predominant expected type of sequence in skeletal samples is  
324 ancient human genomic DNA and its presence would unnecessarily complicate our analysis, the read datasets were subsequently subjected to  
325 filtering by alignment to the standard (hg19) human genome reference sequence. This alignment was performed using the BWAaln algorithm (-  
326 n 0.04, -l 1000), with duplicate removal, using the AGAT software tool - ocwrapper3mt.py script [63]. Any read which aligned without gaps  
327 within the default mismatch rate (dependent on sequence length, e.g. 2 mismatches per 17 bp) was eliminated from the sample dataset.  
328 Subsequently, separate sub-datasets (bins) of reads were generated on the basis of (trimmed) read length: minimal read length threshold  $\geq 20$ bp,  
329  $\geq 25$ bp,  $\geq 30$ bp and  $\geq 35$ bp. These datasets were used for alignment to reference targets. These procedures were applied also to the Kay et al  
330 dataset, used for the Borówka et al. method verification.

331 Estimation of terminal base deamination damage pattern was done by using mapDamage2.0 analysis with specifying a length (-l) of  
332 75 bp and library build preparation type (--single-stranded) (Supplementary Fig.3).

333

### 334 **Query sequence preparation**

335 Selected 18 reference *Mycobacterial* genomes, including 5 of *M. tuberculosis* complex (underlined): *M. abscessus*, *M. africanum*, *M.*  
336 *asiaticum*, *M. avium*, *M. bovis*, *M. caprae*, *M. fortuitum*, *M. haemophilum*, *M. kansasii*, *M. leprae*, *M. marinum*, *M. microti*, *M. phlei*, *M. simiae*,  
337 *M. smegmati*, *M. tuberculosis*, *M. ulcerans*, *M. xenopi* were used. Nucleotide sequences of each organism have been subjected to fragmentation  
338 with FA\_TOOL script (small\_tool.py) [64] respectively for 20 bp, 25 bp, 30 bp and 35 bp-long fragments and allocated in same manner to  
339 length bins. Further, fragmented genomes were used for specificity testing of each constructed target which allowed to overcome the problem of  
340 very short and non-specific fragments with threshold estimation.

341

### 342 **Verification of specificity and sensitivity of NGS screening method**

343 Due to the lack of available NGS data of positive *M. tuberculosis* cases, we tested in-silico methods by the using Kay et al. (2015) dataset  
344 (PRJEB7454), derived from Hungarian mummies tissue microbiome sequencing. SRA files for each sample were identified and downloaded,  
345 further fastq files passed through trimming with deprivation of the adapter sequences [65]. Raw sequencing files were conducted to human  
346 genome reference sequence (hg19) filtration in spite the fact that host DNA material could be dominant in the sample. Alignment was performed  
347 to the tested targets *M. tuberculosis* H37Rv, Borówka et al., Bos et al., and Bouwman et al. using the AGAT software tool [63]. Statistics for  
348 each individual are presented in Supplementary Table 2. Summarized results of aTB cases from Brześć Kujawski are included in Supplementary  
349 Tables 3-6.

350

### 351 **Statistical processing and parametric testing-based outlier detection algorithm**

352 Collected unmapped sequences from original dataset, as well as from Kay et al dataset, were aligned to constructed marker sequences: *M.*  
353 *tuberculosis* H37Rv, Borówka et al. (Supplementary Table 9), Bos et al., and Bouwman et al. with application of experimentally determined  
354 minimal read length threshold  $\geq 17$  bp,  $\geq 20$ bp,  $\geq 25$ bp,  $\geq 30$ bp and  $\geq 35$ bp for detection of potential ancient MTBC cases. For detection of outlier  
355 individuals with high microbial load/positive read ratio, we standardised read ratio values to normal distribution parameters (arithmetic mean

356  
357  
358  
359  
360  
361  
362  
363  
364  
365

355 and standard deviation) and, as a further step in the aTb detection algorithm, applied a typical cut off value of 1.5xSD to detect outliers,  
356 postulating these to be candidates for active tuberculosis.

357 Based on the observation that positive read ratio tends to depend monotonically on read length bin – either consistently increasing or  
358 decreasing for outlier individuals – we decided to calculate a monotonicity parameter. We first standardised positive read ratios as percentage of  
359 average positive read ratio and then calculated ratios of these values for adjoining read length bins ( $\geq 25\text{bp}/\geq 20\text{bp}$ ,  $\geq 30\text{bp}/\geq 25\text{bp}$  and  
360  $\geq 35\text{bp}/\geq 30\text{bp}$ ). For outlier detection, we applied a one-tailed critical z value test on both tails of the sample. We consider the positive outliers  
361 (individuals with consistently increasing share of positively aligned reads with increasing read length) to be confirmed ancient tuberculosis  
362 sufferers (See Supplementary tables 2-4).

### 363 **Availability of supporting data and materials**

364 The datasets supporting the conclusions of this article are available under the NCBI repository project "Identification of ancient tuberculosis in  
365 human archaeological remains" (acc. num. PRJNA422903) including Biosamples and related Sequence Read Archive (SRA).

1  
2  
3  
4  
5  
6  
7  
8  
9  
10  
11  
12  
13  
14  
15  
16  
17  
18  
19  
20  
21  
22  
23  
24  
25  
26  
27  
28  
29  
30  
31  
32  
33  
34  
35  
36  
37  
38  
39  
40  
41  
42  
43  
44  
45  
46  
47  
48  
49  
50  
51  
52  
53  
54  
55  
56  
57  
58  
59  
60  
61  
62  
63  
64  
65

### 366 **Additional files**

367 **Borówka\_et\_al\_Supplementary\_Tables.xls**

368 **Borówka\_et\_al\_Supplementary\_Tables\_legends.doc**

369 **Borówka\_et\_al\_Supplementary\_Figures.pdf**

### 370 **Declarations**

#### 371 **Abbreviations**

372 **aDNA – Ancient DNA**

373 **aTB – Ancient tuberculosis**

374 **NGS – Next Generation Sequencing**

375 **MTBC – *Mycobacterium Tuberculosis* Complex**

376 **MOTT – Mycobacteria other than tuberculosis**

377 **SRA - Sequence Read Archive**

378

#### 379 **Ethics approval and consent to participate**

380 Not applicable.

381

#### 382 **Consent for publication**

383 Not applicable

384

#### 385 **Competing interests**

386 The authors declare that they have no competing interests.

387

388 **Acknowledgments**

389

390 We would like to thank Anna Brzostek for additional laboratory work.

391

392 **Funding**

393 The study was financed by the Polish Ministry of Science and Higher Education grant DIR/WK/2017/01 and by the Polish POPC Grant

394 02.03.01-00-0012/17-00 from the European Regional Development Fund.

395 **Author's contributions**

396 P.B. and D.S. conceived the study, were responsible for extraction of aDNA, preparation of NGS libraries and Next Generation Sequencing of

397 samples. P.B, D.S and Ł.P analyzed the data, discussed the results, and wrote the manuscript. Ł.P. participated in the statistical analysis and

398 figure preparation. B.M wrote and ran AGAT primary analysis. B.B-S. precipitated in sample selection and preparation for laboratory phase.

399 J.D., WL analyzed the samples for pathological changes, participated in the study design, analyzed and discussed the data, and participated in

400 drafting the manuscript. E.Ż. participated in the study design, analyzed and discussed the data, and participated in drafting the manuscript. D.S.

1 401 coordinated studies and was responsible for the final version of the manuscript; all authors read and approved the final manuscript.

2  
3  
4 402

5

6 403

7

8

9 404

10 405

11 406

12 407

13 408

14 409

15 410

16 411

17 412

18 413

19 414

20 415

21 416

22 417

23 418

24 419

25 420

26 421

27 422

28 423

29 424

30 425

31 426

32 427

33 428

34 429

35 430

36 431

37 432

38 433

39 434

40 435

41 436

42 437

43 438

44 439

45 440

46 441

47 442

48 443

49 444

50 445

51 446

52 447

53 448

54 449

55 450

56 451

57

58

59

60

61

62

63

64

65

403 **References**

1. Barrett, R., et al., *Emerging and re-emerging infectious diseases: the third epidemiologic transition*. Annual review of anthropology, 1998. **27**(1): p. 247-271.
2. Armelagos, G.J. and M.N. Cohen, *Paleopathology at the Origins of Agriculture*. 1984: Academic Press Orlando (FL).
3. Armelagos, G.J., A.H. Goodman, and K.H. Jacobs, *The origins of agriculture: Population growth during a period of declining health*. Population & Environment, 1991. **13**(1): p. 9-22.
4. Weiss, R.A. and A.J. McMichael, *Social and environmental risk factors in the emergence of infectious diseases*. Nature medicine, 2004. **10**(12s): p. S70.
5. Ortner, D.J. and W. Putschar, *Identification of Pathological Conditions in Human Skeletal Remains*. Smithsonian Contributions to Anthropology, 1985. **28**.
6. Aufderheide, A.C., Rodriguez-Martin, Conrado and O. Langsjoen, *The Cambridge encyclopedia of human paleopathology*. Vol. 478. 1998: Cambridge University Press Cambridge.
7. Holloway, K.L., et al., *Skeletal lesions in human tuberculosis may sometimes heal: an aid to palaeopathological diagnoses*. PLoS One, 2013. **8**(4): p. e62798.
8. Steinbock, R.T., *Paleopathological diagnosis and interpretation: bone diseases in ancient human populations*. 1976: Charles C Thomas Pub Limited.
9. Donoghue, H., et al., *Mycobacterium tuberculosis complex DNA in calcified pleura from remains 1400 years old*. Letters in Applied Microbiology, 1998. **27**(5): p. 265-269.
10. Donoghue, H.D., *Palaeomicrobiology of tuberculosis*, in *Paleomicrobiology*. 2008, Springer. p. 75-97.
11. Donoghue, H.D., *Human tuberculosis-an ancient disease, as elucidated by ancient microbial biomolecules*. Microbes and infection, 2009. **11**(14): p. 1156-1162.
12. Redman, J.E., et al., *Mycocerosic acid biomarkers for the diagnosis of tuberculosis in the Coimbra Skeletal Collection*. Tuberculosis (Edinb), 2009. **89**(4): p. 267-77.
13. Mark, L., et al., *High-throughput mass spectrometric analysis of 1400-year-old mycolic acids as biomarkers for ancient tuberculosis infection*. Journal of Archaeological Science, 2010. **37**(2): p. 302-305.
14. Minnikin, D.E., et al., *The interplay of DNA and lipid biomarkers in the detection of tuberculosis and leprosy in mummies and other skeletal remains*. 2011, Verlag Dr. Friedrich Pfeil.
15. Tran, T., et al., *Beyond ancient microbial DNA: nonnucleotidic biomolecules for paleomicrobiology*. Biotechniques, 2011. **50**(6): p. 370-380.
16. Masson, M., et al., *Osteological and biomolecular evidence of a 7000-year-old case of hypertrophic pulmonary osteopathy secondary to tuberculosis from neolithic hungary*. PLoS One, 2013. **8**(10): p. e78252.
17. Borowska-Strugińska, B., et al., *Mycolic acids as markers of osseous tuberculosis in the Neolithic skeleton from Kujawy region (central Poland)*. AnthropologicAl review, 2014. **77**(2): p. 137-149.
18. Gernaey, A.M., et al., *Mycolic acids and ancient DNA confirm an osteological diagnosis of tuberculosis*. Tuberculosis (Edinb), 2001. **81**(4): p. 259-65.
19. Boros-Major, A., et al., *New perspectives in biomolecular paleopathology of ancient tuberculosis: a proteomic approach*. Journal of Archaeological Science, 2011. **38**(1): p. 197-201.
20. Harkins, K.M., et al., *Screening ancient tuberculosis with qPCR: challenges and opportunities*. Philos Trans R Soc Lond B Biol Sci, 2015. **370**(1660): p. 20130622.
21. Campana, M.G., et al., *False positives complicate ancient pathogen identifications using high-throughput shotgun sequencing*. BMC research notes, 2014. **7**(1): p. 111.
22. Andam, C.P., et al., *Microbial Genomics of Ancient Plagues and Outbreaks*. Trends Microbiol, 2016. **24**(12): p. 978-990.
23. Bouwman, A.S. and T.A. Brown, *The limits of biomolecular palaeopathology: ancient DNA cannot be used to study venereal syphilis*. Journal of Archaeological Science, 2005. **32**(5): p. 703-713.
24. Tsangaras, K. and A.D. Greenwood, *Museums and disease: using tissue archive and museum samples to study pathogens*. Ann Anat, 2012. **194**(1): p. 58-73.
25. Müller, R., C.A. Roberts, and T.A. Brown, *Complications in the study of ancient tuberculosis: Presence of environmental bacteria in human archaeological remains*. Journal of Archaeological Science, 2016. **68**: p. 5-11.
26. Frothingham, R., H.G. Hills, and K.H. Wilson, *Extensive DNA sequence conservation throughout the Mycobacterium tuberculosis*

- complex. *Journal of clinical microbiology*, 1994. **32**(7): p. 1639-1643.
27. Brites, D. and S. Gagneux, *Co-evolution of Mycobacterium tuberculosis and Homo sapiens*. *Immunol Rev*, 2015. **264**(1): p. 6-24.
28. Minnikin, D.E., et al., *Molecular biomarkers for ancient tuberculosis*, in *Understanding tuberculosis-deciphering the secret life of the bacilli*. 2012, InTech.
29. Minnikin, D.E., et al., *Essentials in the use of mycolic acid biomarkers for tuberculosis detection: response to 'High-throughput mass spectrometric analysis of 1400-year-old mycolic acids as biomarkers for ancient tuberculosis infection'* by. *Journal of Archaeological Science*, 2010. **37**(10): p. 2407-2412.
30. Spigelman, M. and E. Lemma, *The use of the polymerase chain reaction (PCR) to detect Mycobacterium tuberculosis in ancient skeletons*. *International Journal of Osteoarchaeology*, 1993. **3**(2): p. 137-143.
31. Donoghue, H.D., et al., *Ancient DNA analysis - An established technique in charting the evolution of tuberculosis and leprosy*. *Tuberculosis (Edinb)*, 2015. **95 Suppl 1**: p. S140-4.
32. Müller, R., C.A. Roberts, and T.A. Brown, *Complications in the study of ancient tuberculosis: non-specificity of IS6110 PCRs*. *STAR: Science & Technology of Archaeological Research*, 2015. **1**(1): p. 1-8.
33. Pääbo, S., *Molecular cloning of ancient Egyptian mummy DNA*. *Nature*, 1985. **314**(6012): p. 644-645.
34. Salo, W.L., et al., *Identification of Mycobacterium tuberculosis DNA in a pre-Columbian Peruvian mummy*. *Proceedings of the National Academy of Sciences*, 1994. **91**(6): p. 2091-2094.
35. Hershkovitz, I., et al., *Detection and molecular characterization of 9,000-year-old Mycobacterium tuberculosis from a Neolithic settlement in the Eastern Mediterranean*. *PLoS One*, 2008. **3**(10): p. e3426.
36. Mays, S. and G.M. Taylor, *A first prehistoric case of tuberculosis from Britain*. *International Journal of Osteoarchaeology*, 2003. **13**(4): p. 189-196.
37. Zink, A.R., W. Grabner, and A.G. Nerlich, *Molecular identification of human tuberculosis in recent and historic bone tissue samples: The role of molecular techniques for the study of historic tuberculosis*. *Am J Phys Anthropol*, 2005. **126**(1): p. 32-47.
38. Dziadek, J. and A. Sajduda, *Specificity of insertion sequence-based PCR assays for Mycobacterium tuberculosis complex*. *The International Journal of Tuberculosis and Lung Disease*, 2001. **5**(6): p. 569-574.
39. Teo, H.E. and W.C. Peh, *Skeletal tuberculosis in children*. *Pediatric radiology*, 2004. **34**(11): p. 853-860.
40. Kent, L., et al., *Demonstration of homology between IS6110 of Mycobacterium tuberculosis and DNAs of other Mycobacterium spp.?* *Journal of clinical microbiology*, 1995. **33**(9): p. 2290-2293.
41. McHugh, T., L. Newport, and S. Gillespie, *IS6110 homologs are present in multiple copies in mycobacteria other than tuberculosis-causing mycobacteria*. *Journal of clinical microbiology*, 1997. **35**(7): p. 1769-1771.
42. Picardeau, M., et al., *Genotypic characterization of five subspecies of Mycobacterium kansasii*. *J Clin Microbiol*, 1997. **35**(1): p. 25-32.
43. Picardeau, M., et al., *Mycobacterium xenopi IS1395, a novel insertion sequence expanding the IS256 family*. *Microbiology*, 1996. **142**(9): p. 2453-2461.
44. Savelkoul, P.H., et al., *Detection of Mycobacterium tuberculosis complex with real time PCR: comparison of different primer-probe sets based on the IS6110 element*. *Journal of microbiological methods*, 2006. **66**(1): p. 177-180.
45. Rasmussen, S., et al., *Early divergent strains of Yersinia pestis in Eurasia 5,000 years ago*. *Cell*, 2015. **163**(3): p. 571-82.
46. Kay, G.L., et al., *Eighteenth-century genomes show that mixed infections were common at time of peak tuberculosis in Europe*. *Nature communications*, 2015. **6**.
47. Chan, J.Z., et al., *Metagenomic analysis of tuberculosis in a mummy*. *N Engl J Med*, 2013. **369**(3): p. 289-90.
48. Bos, K.I., et al., *Pre-Columbian mycobacterial genomes reveal seals as a source of New World human tuberculosis*. *Nature*, 2014. **514**(7523): p. 494-7.
49. Bos, K.I., et al., *Parallel detection of ancient pathogens via array-based DNA capture*. *Philos Trans R Soc Lond B Biol Sci*, 2015. **370**(1660): p. 20130375.
50. Bouwman, A.S., et al., *Genotype of a historic strain of Mycobacterium tuberculosis*. *Proceedings of the National Academy of Sciences*, 2012. **109**(45): p. 18511-18516.
51. Lorkiewicz, W., et al., *Between the Baltic and Danubian worlds: the genetic affinities of a middle neolithic population from central Poland*. *PLoS One*, 2015. **10**(2): p. e0118316.
52. Aziz, R.K., et al., *The RAST Server: rapid annotations using subsystems technology*. *BMC Genomics*, 2008. **9**(1): p. 75.
53. Djelouadji, Z., D. Raoult, and M. Drancourt, *Palaeogenomics of Mycobacterium tuberculosis: epidemic bursts with a degrading genome*. *Lancet Infect Dis*, 2011. **11**(8): p. 641-50.
54. Fletcher, H.A., et al., *Widespread occurrence of Mycobacterium tuberculosis DNA from 18th-19th century Hungarians*. *American Journal of Physical Anthropology: The Official Publication of the American Association of Physical Anthropologists*, 2003. **120**(2): p. 144-152.
55. Peto, H.M., et al., *Epidemiology of extrapulmonary tuberculosis in the United States, 1993-2006*. *Clinical Infectious Diseases*, 2009. **49**(9): p. 1350-1357.
56. Ginolhac, A., et al., *mapDamage: testing for damage patterns in ancient DNA sequences*. *Bioinformatics*, 2011. **27**(15): p. 2153-5.
57. Jonsson, H., et al., *mapDamage2.0: fast approximate Bayesian estimates of ancient DNA damage parameters*. *Bioinformatics*, 2013. **29**(13): p. 1682-4.
58. Gamba, C., et al., *Genome flux and stasis in a five millennium transect of European prehistory*. *Nature communications*, 2014. **5**: p. 5257.
59. Pinhasi, R., et al., *Optimal ancient DNA yields from the inner ear part of the human petrous bone*. *PLoS One*, 2015. **10**(6): p. e0129102.
60. Fernandes, D., et al., *A genomic Neolithic time transect of hunter-farmer admixture in central Poland*. *Scientific reports*, 2018. **8**(1): p. 14879.
61. Meyer, M. and M. Kircher, *Illumina sequencing library preparation for highly multiplexed target capture and sequencing*. *Cold Spring Harbor Protocols*, 2010. **2010**(6): p. pdb. prot5448.
62. Krueger, F., *Trim Galore!: A wrapper tool around Cutadapt and FastQC to consistently apply quality and adapter trimming to FastQ files*. 2015.
63. Marciniak, B., P. Borówka, and D. Strapagiel, *AGAT tool - Ancient Genomes Analysis Tool*. <https://github.com/BiobankLab/AGAT>; 2016.
64. Marciniak, B., P. Borówka, and D. Strapagiel, *FA\_TOOL-simple command line tool for fasta file editing*. [https://github.com/BiobankLab/FA\\_TOOL](https://github.com/BiobankLab/FA_TOOL); 2016.

452  
453  
454  
455  
456  
457  
458  
459  
460  
461  
462  
463  
464  
465  
466  
467  
468  
469  
470  
471  
472  
473  
474  
475  
476  
477  
478  
479  
480  
1 481  
2 482  
3 483  
4 484  
5 485  
6 486  
7 487  
8 488  
9 489  
10 490  
11 491  
12 492  
13 493  
14 494  
15 495  
16 496  
17 497  
18 498  
19 499  
20 500  
21 501  
22 502  
23 503  
24 504  
25 505  
26 506  
27 507  
28 508  
29 509  
30 510  
31 511  
32 512  
33 513  
34 514  
35 515  
36 516  
37 517  
38 518  
39 519  
40 520  
41 521  
42 522  
43 523  
44  
45  
46  
47  
48  
49  
50  
51  
52  
53  
54  
55  
56  
57  
58  
59  
60  
61  
62  
63  
64  
65



524 **Tables and Figure legends**

525 Table 1. Number of genomic k-mers from MTBC and MOTT members after initial hg19 clearing step matching selected targets, with k-mer length distinction ( $\geq 20$ bp,  $\geq 25$ bp,  $\geq 30$ bp,  $\geq 35$ bp). with estimation of percentage of  
 526 k-mers from a given mycobacterial genomes matching the *M. tuberculosis* genome for query length  $\geq 30$  and  $\geq 35$ .

527

| Species group         | k-mer length           | Genome length (bp) | Query length $\geq 20$                                 |             |                |            | Query length $\geq 25$ |                                                        |             |                | Query length $\geq 30$ |                |                                                        |             | Query length $\geq 35$ |            |                |                                                        |             |                |            |                |
|-----------------------|------------------------|--------------------|--------------------------------------------------------|-------------|----------------|------------|------------------------|--------------------------------------------------------|-------------|----------------|------------------------|----------------|--------------------------------------------------------|-------------|------------------------|------------|----------------|--------------------------------------------------------|-------------|----------------|------------|----------------|
|                       |                        |                    | % of sequences mapped to <i>M. tuberculosis</i> genome | Full genome | Borowka et al. | Bos et al. | Bouwman et al.         | % of sequences mapped to <i>M. tuberculosis</i> genome | Full genome | Borowka et al. | Bos et al.             | Bouwman et al. | % of sequences mapped to <i>M. tuberculosis</i> genome | Full genome | Borowka et al.         | Bos et al. | Bouwman et al. | % of sequences mapped to <i>M. tuberculosis</i> genome | Full genome | Borowka et al. | Bos et al. | Bouwman et al. |
| MOTT                  | <i>M. leprae</i>       | 3268203            | 3.19%                                                  | 140922      | 19736          | 101        | 1683                   | 4.88%                                                  | 215257      | 4349           | 85                     | 2240           | 2.61%                                                  | 115138      | 1430                   | 26         | 1201           | 1.45%                                                  | 63860       | 543            | 6          | 715            |
|                       | <i>M. abscessus</i>    | 5067172            | 5.26%                                                  | 232228      | 46530          | 158        | 2915                   | 2.87%                                                  | 126769      | 2816           | 103                    | 1890           | 1.39%                                                  | 61160       | 283                    | 46         | 1065           | 0.75%                                                  | 33175       | 62             | 14         | 644            |
|                       | <i>M. smegmatis</i>    | 6988209            | 11.19%                                                 | 493570      | 107339         | 543        | 6917                   | 5.68%                                                  | 250537      | 7793           | 340                    | 2919           | 2.88%                                                  | 127219      | 1187                   | 162        | 1610           | 1.64%                                                  | 72286       | 262            | 65         | 944            |
|                       | <i>M. fortuitum</i>    | 6254616            | 8.48%                                                  | 374030      | 77785          | 291        | 5208                   | 5.22%                                                  | 230382      | 5940           | 131                    | 2774           | 2.69%                                                  | 118483      | 958                    | 40         | 1534           | 1.53%                                                  | 67463       | 236            | 16         | 916            |
|                       | <i>M. phlei</i>        | 5349645            | 8.98%                                                  | 396255      | 88582          | 391        | 5909                   | 6.57%                                                  | 289788      | 9912           | 157                    | 3597           | 3.45%                                                  | 152331      | 1665                   | 97         | 1951           | 2.03%                                                  | 89593       | 377            | 56         | 1176           |
|                       | <i>M. simiae</i>       | 5938797            | 9.33%                                                  | 411677      | 80142          | 339        | 5414                   | 9.51%                                                  | 419641      | 12734          | 197                    | 4578           | 5.35%                                                  | 235800      | 3904                   | 93         | 2702           | 3.15%                                                  | 139050      | 1450           | 33         | 1575           |
|                       | <i>M. asiaticum</i>    | 5910436            | 9.00%                                                  | 396854      | 76829          | 413        | 5597                   | 10.69%                                                 | 471493      | 19780          | 392                    | 5022           | 0.00%                                                  | 265638      | 5366                   | 186        | 2806           | 3.54%                                                  | 156188      | 1531           | 71         | 1706           |
|                       | <i>M. xenopi</i>       | 4434836            | 7.14%                                                  | 314850      | 60482          | 262        | 4336                   | 8.17%                                                  | 360395      | 11534          | 207                    | 4105           | 0.00%                                                  | 200395      | 3233                   | 120        | 2126           | 2.62%                                                  | 115687      | 1060           | 68         | 1235           |
|                       | <i>M. marinum</i>      | 6660144            | 9.48%                                                  | 418304      | 82499          | 466        | 5715                   | 14.08%                                                 | 621166      | 52438          | 707                    | 6366           | 7.88%                                                  | 347459      | 16301                  | 266        | 3465           | 4.49%                                                  | 198076      | 4208           | 88         | 2046           |
|                       | <i>M. ulcerans</i>     | 5805761            | 8.26%                                                  | 364492      | 71682          | 339        | 4800                   | 12.26%                                                 | 540893      | 36626          | 448                    | 5543           | 6.94%                                                  | 306075      | 10994                  | 160        | 3094           | 4.04%                                                  | 178217      | 3088           | 61         | 1886           |
|                       | <i>M. kansasii</i>     | 6402301            | 10.51%                                                 | 463445      | 89051          | 472        | 6353                   | 15.93%                                                 | 702577      | 39990          | 596                    | 7181           | 9.54%                                                  | 420814      | 13458                  | 278        | 4032           | 5.82%                                                  | 256893      | 4132           | 129        | 2373           |
| <i>M. avium</i>       | 4829781                | 8.07%              | 356159                                                 | 71620       | 322            | 5128       | 12.08%                 | 532953                                                 | 16610       | 194            | 5331                   | 7.31%          | 322606                                                 | 4752        | 110                    | 3271       | 4.58%          | 202232                                                 | 1475        | 65             | 2095       |                |
| <i>M. haemophilum</i> | 4235765                | 7.08%              | 312375                                                 | 52214       | 274            | 4137       | 13.05%                 | 575862                                                 | 22641       | 540            | 6284                   | 7.98%          | 352034                                                 | 8023        | 374                    | 3703       | 4.94%          | 217744                                                 | 2893        | 254            | 2322       |                |
| MTBC                  | <i>M. caprae</i>       | 4288871            | 17.53%                                                 | 773238      | 181627         | 598        | 9935                   | 94.85%                                                 | 4184378     | 734742         | 2306                   | 37814          | 96.27%                                                 | 4245996     | 725608                 | 2253       | 35935          | 96.21%                                                 | 4244109     | 713211         | 2214       | 34394          |
|                       | <i>M. microti</i>      | 4370115            | 17.81%                                                 | 785606      | 188016         | 825        | 10498                  | 96.71%                                                 | 4266542     | 772527         | 3989                   | 40576          | 98.17%                                                 | 4330722     | 771950                 | 3873       | 38507          | 98.12%                                                 | 4328596     | 758572         | 3785       | 36841          |
|                       | <i>M. africanum</i>    | 4389314            | 17.87%                                                 | 788161      | 186939         | 850        | 10494                  | 97.15%                                                 | 4285645     | 764554         | 4038                   | 40740          | 98.63%                                                 | 4350937     | 764150                 | 3893       | 38685          | 98.60%                                                 | 4349503     | 751103         | 3796       | 37018          |
|                       | <i>M. bovis</i>        | 4345492            | 17.72%                                                 | 781857      | 184148         | 592        | 10161                  | 96.31%                                                 | 4248729     | 750458         | 2304                   | 39042          | 97.79%                                                 | 4313964     | 749050                 | 2252       | 36990          | 97.76%                                                 | 4312566     | 735993         | 2213       | 35367          |
|                       | <i>M. tuberculosis</i> | 4411532            | 18.07%                                                 | 797099      | 192022         | 833        | 10844                  | 98.41%                                                 | 4341179     | 791071         | 3947                   | 42253          | 99.97%                                                 | 4410355     | 792717                 | 3851       | 40180          | 100.00%                                                | 4411458     | 779771         | 3777       | 38435          |

529 Table 2. Number of reads (per individual) used for alignment and statistical processing.

| Sample ID | Raw reads | Trimmed reads | Average read length | Non-human reads | Non-human reads | Non-human reads | Non-human reads |
|-----------|-----------|---------------|---------------------|-----------------|-----------------|-----------------|-----------------|
|-----------|-----------|---------------|---------------------|-----------------|-----------------|-----------------|-----------------|

1  
2  
3  
4  
5  
6  
7  
8  
9  
10  
11  
12  
13  
14  
15  
16  
17  
18  
19  
20  
21  
22  
23  
24  
25  
26  
27  
28  
29  
30  
31  
32  
33  
34  
35  
36  
37  
38  
39  
40  
41  
42  
43  
44  
45  
46  
47  
48  
49  
50  
51  
52  
53  
54  
55  
56  
57  
58  
59  
60  
61  
62  
63  
64  
65

|         |          |          |      | (>20)    | (>25)    | (>30)    | (>35)    |
|---------|----------|----------|------|----------|----------|----------|----------|
| 1_BK4   | 17507911 | 17038725 | 57.6 | 16977024 | 16902603 | 16378765 | 15191086 |
| 4_BK4   | 18816573 | 18215498 | 51.7 | 18095660 | 17960494 | 17086604 | 15246279 |
| 6_BK4   | 16322105 | 15815995 | 55.0 | 15551094 | 15427193 | 14682610 | 13220243 |
| 7_BK4   | 2231650  | 2160395  | 59.7 | 2102955  | 2095297  | 2047913  | 1936435  |
| 9_BK4   | 14974057 | 14503433 | 53.5 | 14240738 | 14085752 | 13149549 | 11600503 |
| 11A_BK4 | 16432267 | 16000777 | 58.0 | 15766313 | 15695767 | 15172161 | 14034604 |
| 11B_BK4 | 18522995 | 18078222 | 55.7 | 725913   | 718941   | 674747   | 597601   |
| 12_BK4  | 23116936 | 22273434 | 55.6 | 21272850 | 21151065 | 20156692 | 18073071 |
| 14_BK4  | 17849685 | 17383629 | 58.8 | 17310864 | 17235014 | 16752835 | 15595926 |
| 15_BK4  | 16062102 | 15607381 | 58.2 | 15539859 | 15460941 | 14915585 | 13881414 |
| 17_BK4  | 14980797 | 14496468 | 58.1 | 14426404 | 14372805 | 14078235 | 13247545 |
| 18_BK4  | 24217412 | 23575201 | 59.1 | 23370869 | 23281268 | 22704123 | 21306454 |
| 21_BK4  | 11890953 | 11500254 | 60.1 | 11271958 | 11237968 | 11021676 | 10439448 |
| 22_BK4  | 17996717 | 17498339 | 58.8 | 17417850 | 17365274 | 17013067 | 16007094 |
| 25_BK4  | 17560698 | 16997518 | 57.7 | 16888515 | 16816770 | 16375850 | 15237575 |
| 29_BK4  | 8994172  | 8724285  | 58.1 | 8683928  | 8642230  | 8393680  | 7800006  |
| 31_BK4  | 20427813 | 19941632 | 58.4 | 19741741 | 19684774 | 19309226 | 18187574 |
| 32_BK4  | 35100769 | 33926405 | 54.9 | 33754943 | 33623260 | 32780233 | 30194531 |
| 33_BK4  | 24501712 | 23719299 | 58.3 | 21669095 | 21595959 | 21031538 | 19569420 |
| 34_BK4  | 16453473 | 16047224 | 57.3 | 14901123 | 14842998 | 14421402 | 13376818 |
| 47_BK4  | 18736966 | 18155651 | 55.6 | 17998648 | 17903991 | 17174561 | 15478180 |
| 55_BK4  | 17435264 | 16904284 | 48.0 | 16768595 | 16530082 | 14886541 | 12170210 |
| 65_BK3  | 17465925 | 16921732 | 50.6 | 16735483 | 16587671 | 15466034 | 13185810 |
| 71_BK4  | 17919758 | 17434181 | 50.4 | 17086979 | 17017135 | 16549441 | 15441174 |
| 72_BK4  | 16355009 | 15952974 | 57.9 | 15874302 | 15812384 | 15444022 | 14541576 |
| 73_BK4  | 17050731 | 16578547 | 57.8 | 16270896 | 16212738 | 15778509 | 14632126 |
| 77_BK4  | 14044420 | 13478859 | 56.0 | 13390126 | 13322735 | 12866845 | 11763625 |
| 78_BK4  | 17004599 | 16352717 | 60.1 | 16250859 | 16164585 | 15758397 | 15027226 |

531  
532  
533  
534  
535  
536  
537  
538

**Fig 1. Changes in standardised ratio values in different read length bins and targets (red diamonds - outliers in *Mycobacterium tuberculosis* H37Rv and Borówka et al. targets in bin of reads equal or longer than 30).**

**Fig 2. Comparison of alignment targets constructed with different assumptions (red diamonds indicate outliers in *Mycobacterium tuberculosis* H37Rv and Borówka et al. targets in bin of reads equal or longer than 35).**

1  
2  
3  
4  
5  
6  
7  
8  
9  
10  
11  
12  
13  
14  
15  
16  
17  
18  
19  
20  
21  
22  
23  
24  
25  
26  
27  
28  
29  
30  
31  
32  
33  
34  
35  
36  
37  
38  
39  
40  
41  
42  
43  
44  
45  
46  
47  
48  
49  
50  
51  
52  
53  
54  
55  
56  
57  
58  
59  
60  
61  
62  
63  
64  
65

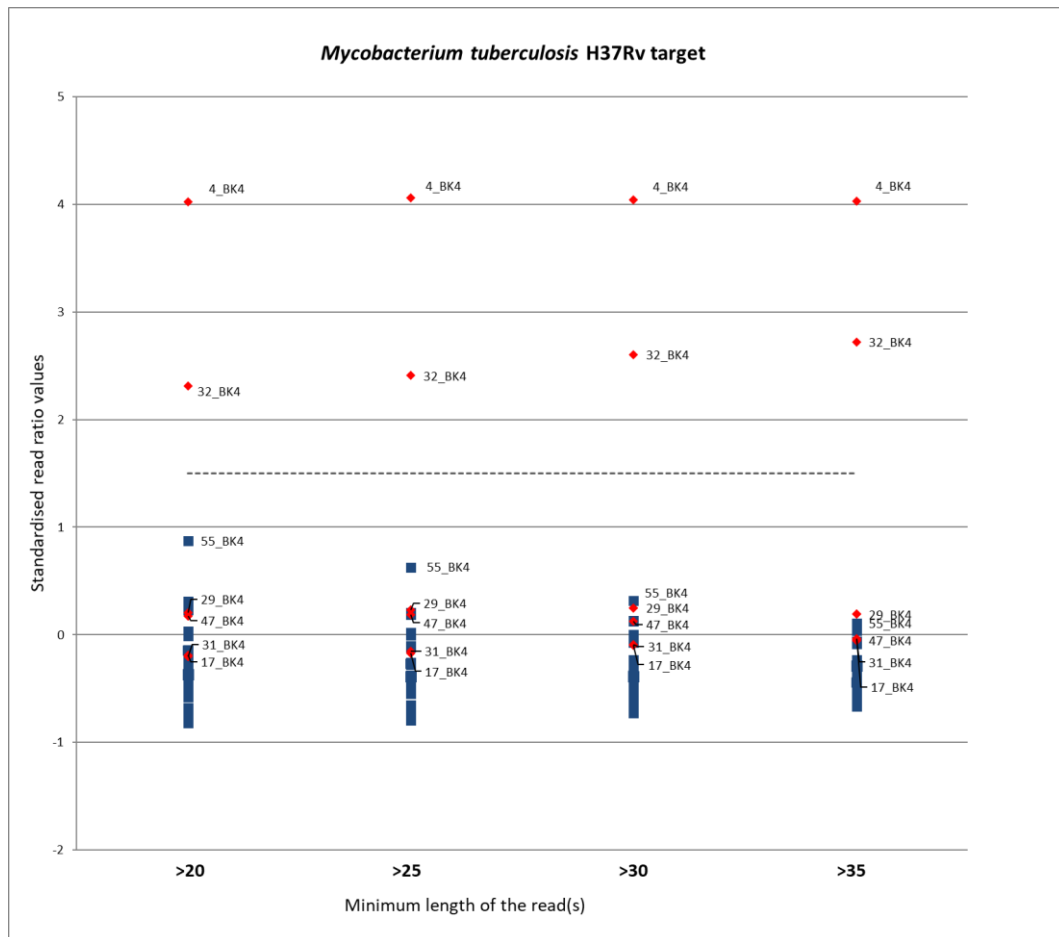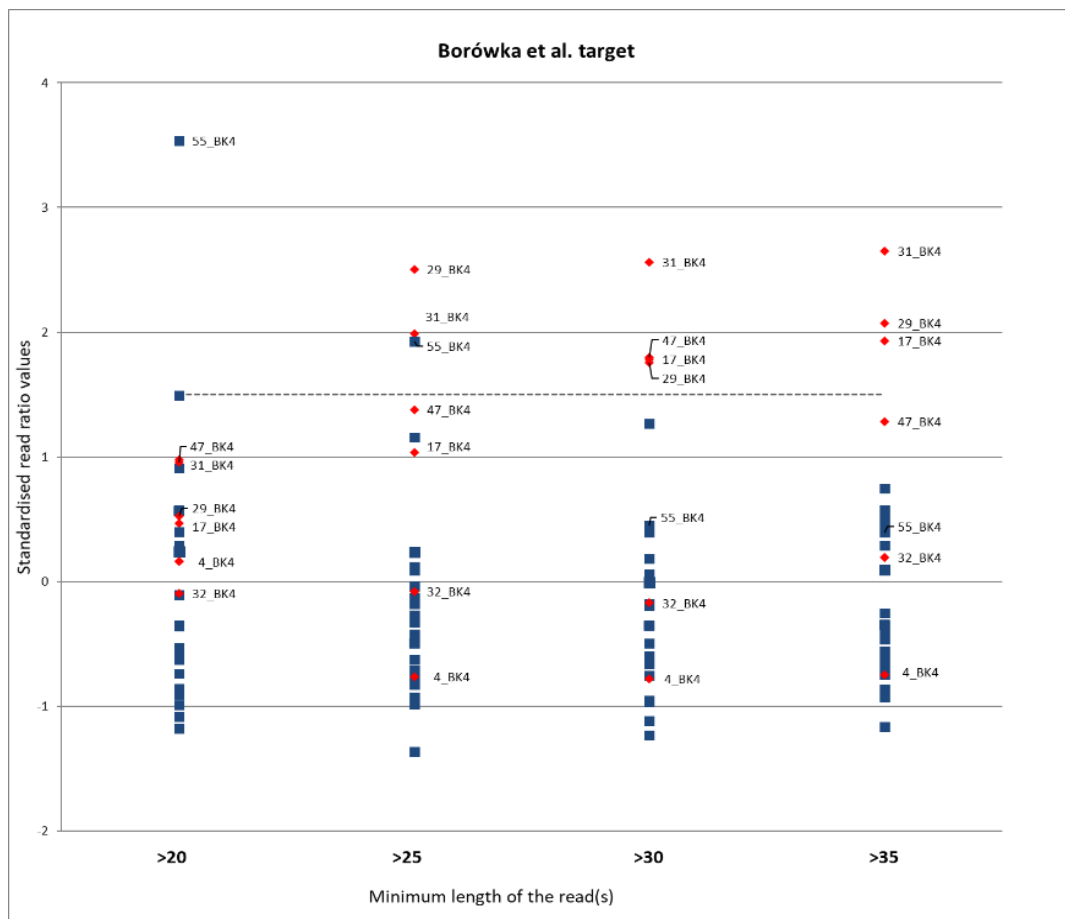

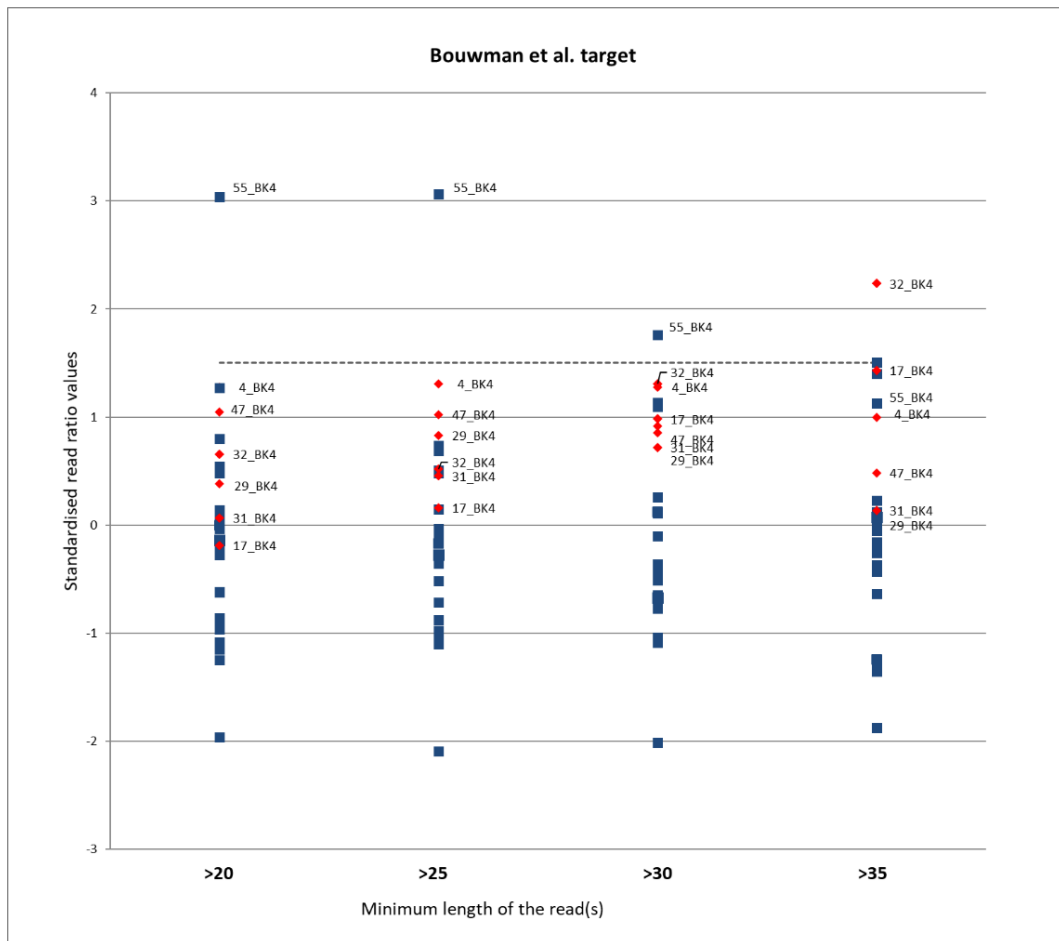

**Fig 1.** Changes in standardized ratio values in different read length bins and targets (red diamonds – outliers in *Mycobacterium tuberculosis* H37Rv and Borówka et al. targets in bin of reads equal or longer than 30). Dotted line present cutoff values based on  $1.5 \times SD$ .

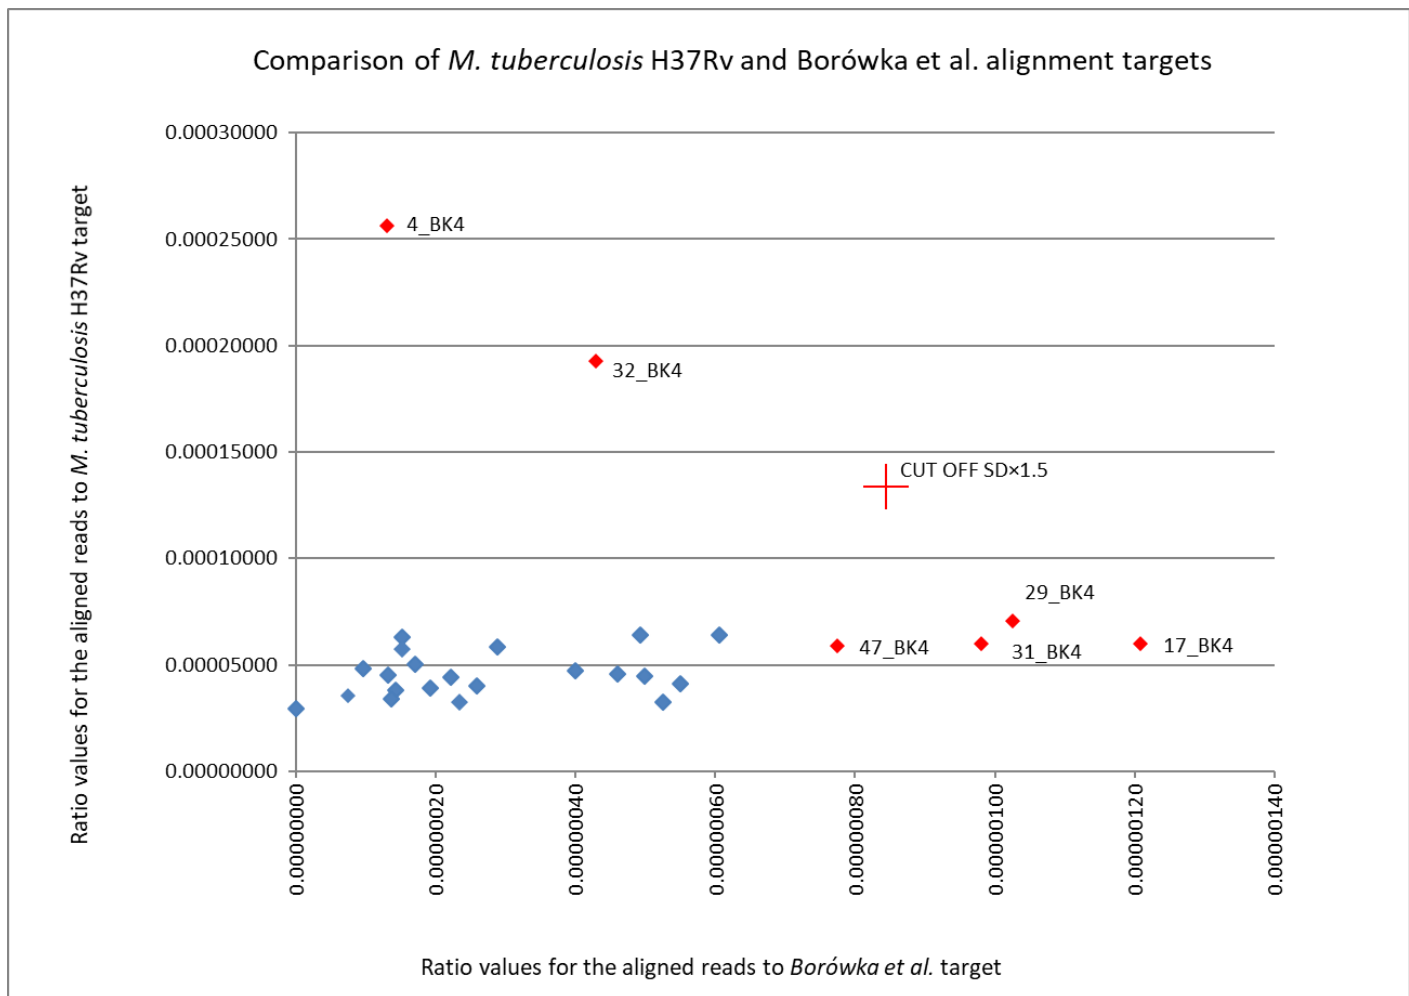

**Fig 2.** Comparison of alignment targets constructed with different assumptions (red diamonds indicate outliers in *Mycobacterium tuberculosis* H37Rv and Borówka et al. targets in bin of reads equal or longer than 35).



Click here to access/download  
**Supplementary Material**  
renamed\_c9c9d.xls



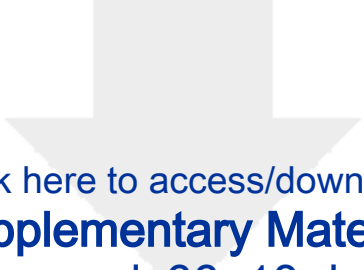

Click here to access/download  
**Supplementary Material**  
renamed\_66a18.docx





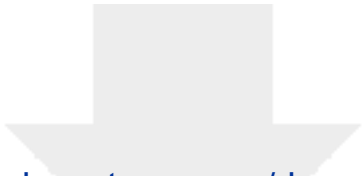

Click here to access/download  
**Supplementary Material**  
renamed\_07b58.docx



This manuscript was formerly submitted to GigaScience as GIGA-D-17-00350. It received three exhaustive reviews and as a result, the editor recommended us to “rethink the key messages” and to resubmit a substantially revised manuscript.

We thank the reviewers for the time and effort spent on suggesting ways to improve our manuscript. We used these suggestions to extensively rewrite the manuscript, perform new analyses and substantially modify both the rationale and the conclusions of the study. We hereby resubmit the manuscript and we attach a careful point-by-point explanation of modifications that were introduced in response to specific concerns of the reviewers. Therefore, we would appreciate a repetition of the peer review process and reconsideration of the possibility of publication of our study in GigaScience.

Sincerely,

Dominik Strapagiel

Reviewer 1

The Introduction (Background) gives an overview of diseases initiated in the Neolithic period and later. The cited references are not always appropriate and several do not cover points highlighted in the text.

We have now modified the Introduction to include more relevant citations and to phrase them so that the relation between our text and citations is unambiguous.

For example, the first paragraph mentions cholera, plague, leprosy, tuberculosis and malaria, yet the cited references deal only with plague (4 refs) and malaria (1). Ref 5 is a review that covers lineages and genotypes but there is nothing about pathology or lesions.

We have rephrased the introduction to remove the need to extensively cite references that would have very remote bearing on the rest of the manuscript and on the rationale of our studies, concentrating on the central justification of our research.

Ref 6 is cited with the description of the Neolithic transition yet it deals only with methods used for the MTBC. Refs 7 and 8 similarly do not mention lesions or morphology but discuss epidemiology and typing. Ref 26 deals with cattle movements rather than bovine TB. Cited ref 29 deals with venereal syphilis not TB. In paragraphs 2 & 3, ref 32 dates back to 1994 and our understanding has been updated since. Ref 33 is cited incorrectly as it describes genotypes and evolution.

These references have been replaced by more relevant ones.

The 'often insurmountable difficulties' in distinguishing members of the MTB complex is incorrect as this can readily be resolved on the basis of our knowledge of the specific and the shared DNA sequences.

The sentence has been rephrased to refer more specifically to knowledge gaps with regard to ancient pathogen genomes.

The controversy mentioned in line 51-52 relates to subsequent authors (e.g. refs 31 and 39) ignoring the information on the specificity of particular target sites in the repetitive sequences IS6110 and IS1081. It is clear from refs 56 and 57 that discrimination between the MTB complex and other mycobacteria is possible provided that the appropriate DNA target sequence is used. Indeed, the present authors, in their cited paper 47, state that the IS6110 site is highly discriminatory and reproducible. Paragraph 3, 2nd sentence, mentions one case when mass spectroscopy was interpreted incorrectly in one laboratory.

We have reformulated the statements referring to controversies about the sensitivity and discriminatory power of biochemical methods and IS PCR for ancient MTBC determination so that the current consensus is emphasised over past shortcomings of some published literature. We also placed more emphasis on the difficulty of specific discrimination between MTBC and MOTT.

Line 68 – suggest the paragraph heading is changed from ‘Data Description’ to ‘Paleopathology of bone samples’.

Since the purpose of this paragraph goes beyond the paleopathological description of bone samples, including also the geographic and archeological context of the samples, we have changed the heading from “Sample description” to “Description of archeological samples”.

Line 122 states that ‘Fig. 1 presents the changes in standardised ratio values in different read length bins.’ However, the legend in Figure 1 states that ‘red diamonds – outliers in Mycobacterium tuberculosis H37Rv and Borówka et al. targets in bin of reads equal or longer than 30).’ However, the figure appears to show that there are red diamonds indicating read ratios  $\leq 20$  and 25.

We rewrote the figure caption and the relevant paragraph in Results to explain more carefully that visual emphasis (red diamonds) is used to identify all datapoints belonging to those samples that registered as outliers in the long (relevant) read bins, even if these samples do not exceed the threshold for the length bins which include shorter reads. We chose this presentation form so that the conclusions drawn in text are more apparent at first sight, i.e. the distinction becomes apparent between samples where match ratio increases with read length and samples where match ratio stays consistently high even for shorter reads.

Line 198 – it is less confusing to the reader if the list of read numbers is the same in the text and the Figure legend.

This has now been corrected.

Lines 220-222 – again, this is an overall generalization that disregards the specificity obtained when appropriate PCR target regions are selected

Since we rewrote extensively this section of Discussion, we hope that the present phrasing does not include too sweeping generalizations on the limits of applicability of non-NGS MTBC identification methods.

In general, the Discussion is somewhat long and rambling and would have more impact if succinct.

We attempted to make the discussion more concise, while also introducing some additional aspects required by other reviewers.

All minor grammatical, spelling and style mistakes pointed out by the reviewer have been corrected in the new manuscript.

Reviewer 2

\* To determine the minimum read length cut-off, the authors use 20, 25, 30, and 35 bp as thresholds and their results show that 30 bp is the optimum minimum read length for mapping. This is not a new discovery - 30 bp is a well-established minimal read length cut-off (see Schubert et al. 2012). Most aDNA studies do not use reads less than 30 bp for mapping, although some studies might use reads  $\geq$  25 bp. Hence, this finding that read length impacts specificity of mapping is not new and the authors' suggestion that reads less than 30 bp should not be used for mapping is not a significant contribution of this paper.

We agree with the reviewer that our original manuscript placed too much emphasis on the possibility of pathogen misidentification when shorter reads are used, since this risk is well-understood and mostly eliminated in literature. We have now rewritten numerous sections of the manuscript, including Introduction and Discussion, to deemphasize this element, since it is not central to the message of our study. We retain the analyses of read length bins that include shorter reads, since an important part of our reasoning is the quantitative analysis of changes that the inclusion of shorter reads cause (e.g. Supplementary Fig. 1), but we no longer claim that obtaining more specific results using reads >30 bp is novel or original to our method.

\* To determine the optimum alignment target, the authors evaluate four genomic alignment targets - 1) the complete *M. tuberculosis* genome (strain H37Rv), 2) a 0.8 Mb-long generated alignment comprising coding sequences specific to the MTBC (designed by the authors for the purposes of this study), 3) a 0.046 Mb-long alignment (Bowman et al.), and 4) an alignment of the *katG* and *mtp40* elements specific to the MTBC (Bos et al.). The fact that the Borówka et al. alignment is only 0.8 Mb in length means that phylogenetically important regions of the entire 4.4 Mb genome will not be covered. As such, this alignment can only be used as a first-pass approach for screening samples for the presence/absence of MTBC. However, should one desire to determine the percentage coverage of the entire genome or check for presence of lineage-specific SNPs, one would need to map the reads to the entire *M. tuberculosis* genome as well. As such, I am not sure whether the Borówka et al. alignment is by itself a significant contribution.

This is a very valid concern which we attempted to address already in the original manuscript, declaring that efficient phylogenetical analysis would probably require much deeper sequencing, possibly using targetted enrichment, as well as genome reconstruction; however, in the present study our goal was limited to increasing the reliability of first-pass screening with regard to identification of MTBC false positives. We consider especially important the fact that this is a relatively easy and cheap method that makes it possible to disregard unreliable osteopathological data when selecting poorly-preserved, very old samples for further, labor- and cost-intensive approaches, and we have now rewritten the manuscript to place more emphasis on this aspect of our study.

\* The samples screened in this study range from 4000-6000 years old and as the authors state in Line 212, it is possible that "the preservation of MTBC aDNA was too poor to pass the sensitivity/specificity threshold of the method proposed". It is incorrect to use samples which may or may not contain MTBC DNA to test out the designed bioinformatics screening approach; furthermore, the authors do not have any positive controls. It is important to test this approach on other ancient samples which have been successful for MTBC genome recovery and reconstruction. To this end, the authors should test out this approach on publicly available data for the ancient human samples from Peru (Bos et al. 2014) and Hungarian mummies (Kay et al. 2015) to see if these are deemed as "positive outliers" by their

approach. These data are publicly available on the Sequence Read Archive and it is surprising that they were not used to test out the approach.

This very helpful suggestion led us to restructure our study, applying our analysis to the publicly available data from the Hungarian mummies study of Kay et al. (the Peruvian samples of Bos et al. were analysed exclusively by capture enrichment and thus a full NGS dataset that is required for our analysis is not available in this case). This analysis is now included in Results and Discussion and we feel it has improved the quality of our study tangibly by including a positive control and confirming the identification of “high-priority” samples for costly genome reconstruction.

**\* One of the most important parameters in using BWA aln for mapping is the edit distance (defined by the -n parameter). As shown by Bos et al. 2014, using an edit distance of 0.04 (which is the default in BWA and what the authors seem to have used here), might lead to cross-mapping by closely related MOTT. Bos et al. suggest using a more stringent mapping with -n = 0.1. The authors should determine if changing this parameter affects the results of this study. To this end, I recommend re-doing the mapping with n=0.1 for all samples with the H37Rv genome and Borówka et al. alignment at least.**

This strategy was used in study Bos et al. and was appropriate for their method for library preparation (enrichment). With high number of reads that are capable for alignment this could lead to define single variation or genotyping in final consensus sequence. In our approach (without enrichment, low depth sequencing strategy) it could lead to lower number of aligned reads to reference. To obtain high specificity in our approach we have design appropriate target – Borówka et al.

**\* Line 2: Given the context, the "ancient host microbiome" in this sentence should be replaced by "ancient host metagenome".**

**\* Line 7: Replace "in silico approach" by "bioinformatics approach". It is correct to say that the authors have used an in silico procedure for testing out their bioinformatics approach, as they state in Lines 171-173. However, the approach itself should be termed as a bioinformatics approach.**

**\* In general, the Results section should be reworded to explicitly state the results of the study. The way it is written currently could lead readers to assume that the authors were able to unambiguously identify positive MTBC cases from their ancient samples, which is not the case.**

We have now rephrased the Abstract to avoid the above-listed awkward expressions.

\* Line 39: Given the context, the word "microbiome" should be replaced by "metagenome".

We disagree with the reviewer – in the phrase “presence of DNA and other metabolites from the whole microbiome”, it is specifically the microbiome (the entire complex of microorganisms that inhabit an ecological niche, in this case the body of the deceased) that is meant and contains both DNA and metabolites, and not the metagenome (the collected genomes of these microorganisms), which contains genetic information, but certainly no metabolites.

\* Lines 45-48 should be reworded. In the first sentence, the authors state that the use of MALDI-TOF to assess mycolic acids is a reliable method to identify presence of MTBC in archaeological samples. This remains a matter of contention, especially as the authors state in the next sentence that such methods have been "shown to be erroneous in some cases".

We have rephrased this sentence to be less categorical and to segue more smoothly into the subsequent one.

\* In Lines 48-54, the authors talk about how PCR-based approaches are a commonly used tool for determining presence/absence of MTBC infection in the context of ancient DNA; however, the references used in this section are fairly dated. Newer aDNA studies have shown that quantitative PCR-based approaches can serve as an effective first-pass screening tool for MTBC, as a primer-probe approach is more specific and sensitive than PCR-based assays (Harkins et al. 2015). These approaches can help researchers select a subset of samples to be processed for further NGS analyses, especially since qPCR is much cheaper than high-throughput shotgun sequencing and not all researchers have the financial ability to shotgun-sequence a large number of samples at enough depth. The authors should add a sentence regarding the same to either this section or the Discussion section.

We have added a relevant sentence since it indeed makes the background presentation for our study more comprehensive.

\* In Line 104, the authors suggest that the length thresholds, ranging from 17 bp to 35 bp, were chosen "to reflect the usual variability in ancient microbial sequence length used for phylogenetic analyses". aDNA researchers do not use reads less than 25-30 bp for mapping and by extension, for phylogenetic analyses. Can the authors provide any recent references which suggest that reads as small as 17 bp were used in such analyses?



We have now re-evaluated the main tenets of our study and de-emphasized the novelty inherent in mapping longer reads, since choosing them is indeed the current scientific consensus. The analysis of mapping results using reads of different length is still one of the main approaches used by us, because we found that the comparison of mapped reads (extent of changes in specificity with increasing read length) provides additional information which can be used (see e.g. Supplementary Fig. 1). We rewrote the whole manuscript to reflect this change in study rationale.

\* Lines 104-105 read "Tab.1 presents the number of reads which satisfied these length criteria in DNA samples from each individual". I believe this is shown by Table 2. Hence, the tables should be interchanged.

\* In Line 180, "Table 1" should be changed to "Table 2". As stated earlier, the tables should be interchanged in accordance with the order in which they appear in the Main Text.

\* In Line 190, "Fig. 3" is referenced; however, there is no Figure 3 in the Main Text. I believe the authors are referencing "Supplementary Figure 3" here. The figure either needs to be moved from the Supplementary Materials to the Main Figures or the numbering of the Supplementary Figures needs to be changed accordingly.

In the new manuscript text, the order of tables and figures agrees with the order of their citation.

\* In Lines 164-165, the authors state that "elimination of false positives is of paramount importance". What about false negatives? Since this is a screening approach, one can argue that false negatives are equally important, since one does not want to miss out on picking up a potentially positive sample of archaeological importance. If the workflow involves using this bioinformatics approach as a screening tool followed by target enrichment or deeper sequencing to recover whole MTBC genomes, then one need not worry about a potential false positive sample being carried through to the second stage, since these will likely drop out during the target enrichment process or further bioinformatic analyses of target-enriched data.

We now rewrote both this paragraph of Results and the Discussion to more precisely reflect our thesis that our screening approach with its inherent high specificity due to increased attention to possible MOTT contaminants is especially useful in studies with highly degraded samples (necessitating enrichment and/or high coverage sequencing) and limited means, where "dropping out" of false positive

samples at the costly deep sequencing stage would mean an unacceptable and unsustainable financial burden on the study.

\* In Supplementary Figure 2, are the damage plots based on reads mapping to the entire *M. tuberculosis* genome? This needs to be explicitly stated. It would be interesting to see MapDamage plots for both mapping schemes (H37Rv and Borówka et al.) for all five samples.

We have done mapDamage analysis for selected six individuals (possibly MTBC positive or MOTT positive), for confirmation of ancient status of analyzed samples. In current version of manuscript deamination patterns are shown in Supplementary Fig. 3.

\* In Lines 213-214, the authors state that "for diagnosis of ancient tuberculosis cases, biochemical methods based on mass spectrometry are very promising". I would reword this to say that these methods are very promising and useful in a contemporary epidemiological context. However, as the authors state in Lines 216-219, there are several hindrances to using these methods in the context of ancient DNA.

\* In general, the Lines 213-223 seem repetitive since the content has already been mentioned in the Background section.

\* In Lines 223-225, the authors mention how NGS has been used to diagnose cases of ancient tuberculosis. The Kay et al. 2015 paper in which a metagenomics approach was used to recover near-complete MTBC genomes from 18th century Hungarian mummies needs to be mentioned here, as it is the only study till date which has allowed for ancient MTBC genome reconstruction without the use of target enrichment techniques.

\* In the paragraph ending on Line 227, I would recommend the authors also discuss the use of target enrichment methods to capture whole MTBC genomes from ancient DNA samples since target enrichment is now a widespread tool in the field of ancient pathogen genomics.

We now entirely rewrote the Discussion section to include all the above suggestions and remarks, and to reflect the changed overall rationale of the study.

\* In Lines 246-248, the authors state that "If a highly specific method like the one we propose is used to identify likely ancient MTBC infection, potential lineage determination should proceed by other methods developed specifically for this purpose, e.g. presence of TbD1." Given the small size of the Borówka et al.

alignment, MTBC lineage-specific SNPs (Coll et al. 2014, Stucki et al. 2016) might not be covered. The TbD1 deletion can only be used to classify a strain into the "modern" and "ancient" lineages and does not give further information about the phylogenetic relationships. Currently, in both modern as well as ancient contexts, lineage-determining SNPs are an important and well-established method of classification, which the authors should note. Using only their alignment target might lead to the presence/absence of these SNPs not being determined in the ancient samples screened and the authors should not that this is a limitation of their approach.

Obviously, for a full phylogenetic study, a dataset which is both as broad and as deep as possible is a prerequisite. While preliminary lineage assignment can proceed on the basis of fragmentary data (e.g. TbD1 presence, individual lineage-specific SNPs etc.), this approach is inherently limited – instead, modern (albeit costly) genome reconstruction techniques allow a reliable full genome-based phylogenetic analysis. Our study should be meant as a cost-effective pre-screening algorithm for poorly preserved ancient samples, to be selected for the full deep sequencing pipeline. We have rewritten the Discussion to unequivocally reflect this approach.

\* For Lines 252-253, is there a reference that can be cited for this statement?

Even though the original sentence is rephrased in this version of Discussion, we have now included a reference that deals with contamination with soil MOTT.

\* In the context of Lines 261-263, the authors identify *M. marinum* as a potential infectious agent present in two samples in this data-set. *M. marinum* infection typically occurs opportunistically in individuals working with fish, such as in aquariums. Given the archaeological context of these individuals, can the authors expand on whether it is possible that these individuals were infected by *M. marinum* and what could potentially be a source of this infection?

We have now added a sentence that deals specifically with this topic.

\* After reading the Ancient DNA Extractions section, it seems unclear to me how the authors can conclude that ancient DNA was successfully recovered from the samples. An easy way to assess this would be to map the shotgun data to the human genome (either whole or mitochondrial) and assess host endogenous DNA preservation and damage patterns. The authors should include MapDamage plots showing that the human DNA present in these samples shows patterns characteristic of aDNA.

\* Line 276 states that "Ancient DNA was successfully isolated from all bone samples." The authors need to elaborate on how this was determined.

This was determined by performing MapDamage analysis on the human sequences in isolated DNA – this information is now included in the manuscript as a Supplementary Fig. 3.

\* In lines 276-277, the authors state that "Illumina libraries were prepared in a separate facility according to Meyer et al." The authors do not specify that these samples were treated with UDG enzyme before library preparation. It would be helpful to explicitly state this. Since the presence of post-mortem damage was assessed using MapDamage, I am assuming that these are non-UDG treated libraries. When mapping the data from non-UDG treated libraries, certain BWA mapping parameters should be changed, such as disabling the seed (Schubert et al. 2012).

A more detailed description of this part of analysis protocol, clarifying the above-described ambiguities, is now included.

\* In Lines 284-285, the authors do not state whether the FASTQ reads were quality filtered before mapping. What is the quality threshold of the reads that were used as input for mapping? Most aDNA studies use a cut-off of Q20 at this stage (Schubert et al. 2012).

\* In Lines 286-287, the authors need to expand on how the mapping to the human genome was conducted, especially since many readers might be unfamiliar with the AGAT mapping tool. What parameters were used?

\* For the BWA alignments to the four MTBC targets, was any post-mapping quality filtering conducted? For example, most aDNA studies would filter out reads at a threshold of at least Q30 (or even Q37). Was any duplicate removal conducted? It might be that too few reads mapped to the target to conduct quality filtering and/or duplicate removal, but in that case, the authors need to state this explicitly.

A more detailed description of this part of analysis protocol, clarifying the above-described ambiguities, are now included in methods section.

**Reviewer 3**

First, as authentication is the focus of this manuscript, I refer the authors to two relevant review papers that discuss this: Warriner et al (Annual Review of Genomics and Human Genetics, 2017) and Key et al. (Trends in Genetics, 2017). At least one of these works should be cited, and application of the authentication criteria therein to the current dataset would be valuable.

This has now been corrected. The Kay et al dataset was used for verification of proposed Borowka et al approach.

The criterion upon which they place the greatest focus is a bit surprising. The authors have chosen to direct their efforts toward read length filtering of metagenomic data. They perform several tests to assess potential false positives from several read length categories from 17 to >35bp, as determined by mapping statistics against three sets of TB complex references, one from Bouwman et al, a reduced set from Bos et al., and a new set established here. Ultimately, they conclude that read lengths of 30bp or greater are required for confident mapping. Such a result is not a surprise. To my knowledge, applying a length filter of 30 to read data before mapping is standard in ancient DNA work with NGS data. In this sense, I am not convinced of the relevance of the paper in its current form. I suggest they peruse the literature closely to determine how common the length filtering is. If I am incorrect, and length filtering is not common, then the authors should include a short justification for the importance of this filter and the necessity to investigate it. If length filtering is indeed common practice, I suggest the authors shift their focus to the selection of reference sequences for reliable mapping of pathogenic mycobacteria. This aspect of the paper is novel and the results are highly useful for screening metagenomic datasets, if sequenced to sufficient depth.

We agree with the reviewer that our original manuscript focused mostly on the estimation of the proper read length used for alignment in ancient DNA studies. In current version of manuscript this issue was rewritten, with emphasis that obtaining more specific results using reads >30 bp is not original to our method. Purpose of using reads of different length with comparison of obtained results could be informative on some point, and in our opinion still provides additional information about analyzed samples.

I found the order of the analyses counterintuitive. They first present authenticity tests on ancient metagenomic data for which they have no information on TB DNA survival. At the end of the results section, they describe an in-silico test using artificially fragmented modern genomes to test the reliability of their screening approach. This should be presented the other way around. It would strengthen the manuscript to first perform a series of tests using simulated short reads from modern MTBC and environmentally-derived genomes to establish their most reliable reference template, mapping parameters, and length filtering, and then use these parameters on an ancient DNA set as a

provisional screening. Also, I suggest the authors use Gargammel (Renaud et al. Bioinformatics, 2017) to give their modern reads a simulated ancient DNA damage profile.

Manuscript was rewritten due to comments and strengthen on developed approach. Current version of manuscript obtains additionally mapping results from Kay et al. dataset, with confirm usage of Borówka et al. approach in screening detection of *Mycobacterium tuberculosis* complex members in ancient samples.

I find the authors overconfident in their identifications of MTBC reads in the ancient data. As there are too few reads to perform mapdamage analysis, the authors should be clear that they have identified suggestive cases that await confirmation via other means. As the mapped reads extremely are few, it might be advantageous to assess their positions visually in an alignment viewer to see if they are clustered in short regions, or if they have SNPs that differ from the reference. With low coverage positive data, the expectation is that reads will be uniformly distributed across the reference template for non-repeated sections and have little sequence divergence. This would make a suitable figure for their supplementary, perhaps for the five samples that have the highest mapping reads for the >30 category (especially since two are suspected MOTT cases). Their repeated use of the term “positive” reads for those greater than 30bp mapping to a TB reference is presumptuous, and implies they are in fact derived from an ancient pathogen, which can't be determined at this stage.

The statement in their abstract that their methods “provide statistically supported identification of ancient disease cases” is too strong. This is again echoed in the authors' assertion that all samples with read ratio values of greater than 1.5SD are “confirmed cases of TB infection” (line 134). This is especially important when considering Figure S3, which reveals all samples to have a decent number of reads mapping to *M. marinum*. In this figure, the three samples regarded as the best candidates for ancient TB infections should be shown in addition to the two outliers that are suspected MOTT cases.

“The statement in their abstract that their methods “provide statistically supported identification of ancient disease cases” is too strong” - the sentence has been softener in the current version of manuscript. Supplementary Fig. 2 have marked candidates for ancient TB infection.

In short, I suggest the authors redirect their focus to in-silico based tests, and present the ancient data set as a test case that awaits downstream authentication.

Manuscript has been rewritten and these issues are now corrected.

Minor points:

Descriptions of non-NGS detection methods should be limited to the introduction and not revisited in the discussion unless they apply to the specific dataset presented in the manuscript.

This has now been corrected.

The authors should state in the results section the sequencing platform and the sequencing depth. While these are technically methods, knowing this is essential to properly interpreting their mapping results.

This information has been added in Analyses section.

Line 50 – remove the word “proven”, especially since the next sentence explores problems with PCR-based approaches

This has now been corrected.

Line 92 – This sentence is confusing. I suggest the authors state “specific to the complex” defined as human lineages 1 – 7 and the animal lineages.

This has now been corrected.

Lines 106 – 114 – The authors should mention that reads mapping to hg19 were removed

This has now been corrected.

The caption for supplementary figure 3 needs greater explanation

This has now been corrected.

It would be helpful to present a table disclosing the results from the *M. marinum* mapping.

In current version of manuscript, we append supplementary table 10, with alignment results for read length >30 for this target.
