# Supplementary material for: Screening methods for detection of ancient Mycobacterium tuberculosis complex fingerprints in next-generation sequencing data derived from skeletal samples
Source: PubMed Central journal article supplement (PMC6586198; doi:10.1093/gigascience/giz065), 2019-06-20
Supplement: giz065_giga-d-19-00014_revision_1.pdf [file giz065_giga-d-19-00014_revision_1.pdf]

## Screening methods for detection of ancient Mycobacterium tuberculosis complex fingerprints in NGS data derived from skeletal samples

--Manuscript Draft--

|                                                      |                                                                                                                                                                                                                                                                                                                                                                                                                                                                                                                                                                                                                                                                                                                                                                                                                                                                                                                                                                                                                                                                                                                                                                                                                                                                                                                                                                                                                                                                                                                                                                                                                                                                                                                                                                                                 |                       |
|------------------------------------------------------|-------------------------------------------------------------------------------------------------------------------------------------------------------------------------------------------------------------------------------------------------------------------------------------------------------------------------------------------------------------------------------------------------------------------------------------------------------------------------------------------------------------------------------------------------------------------------------------------------------------------------------------------------------------------------------------------------------------------------------------------------------------------------------------------------------------------------------------------------------------------------------------------------------------------------------------------------------------------------------------------------------------------------------------------------------------------------------------------------------------------------------------------------------------------------------------------------------------------------------------------------------------------------------------------------------------------------------------------------------------------------------------------------------------------------------------------------------------------------------------------------------------------------------------------------------------------------------------------------------------------------------------------------------------------------------------------------------------------------------------------------------------------------------------------------|-----------------------|
| <b>Manuscript Number:</b>                            | GIGA-D-19-00014R1                                                                                                                                                                                                                                                                                                                                                                                                                                                                                                                                                                                                                                                                                                                                                                                                                                                                                                                                                                                                                                                                                                                                                                                                                                                                                                                                                                                                                                                                                                                                                                                                                                                                                                                                                                               |                       |
| <b>Full Title:</b>                                   | Screening methods for detection of ancient Mycobacterium tuberculosis complex fingerprints in NGS data derived from skeletal samples                                                                                                                                                                                                                                                                                                                                                                                                                                                                                                                                                                                                                                                                                                                                                                                                                                                                                                                                                                                                                                                                                                                                                                                                                                                                                                                                                                                                                                                                                                                                                                                                                                                            |                       |
| <b>Article Type:</b>                                 | Research                                                                                                                                                                                                                                                                                                                                                                                                                                                                                                                                                                                                                                                                                                                                                                                                                                                                                                                                                                                                                                                                                                                                                                                                                                                                                                                                                                                                                                                                                                                                                                                                                                                                                                                                                                                        |                       |
| <b>Funding Information:</b>                          | Ministerstwo Nauki i Szkolnictwa Wyższego (DIR/WK/2017/01)                                                                                                                                                                                                                                                                                                                                                                                                                                                                                                                                                                                                                                                                                                                                                                                                                                                                                                                                                                                                                                                                                                                                                                                                                                                                                                                                                                                                                                                                                                                                                                                                                                                                                                                                      | Dr Dominik Strapagiel |
|                                                      | Operational Programme Digital Poland (02.03.01-00-0012/17-00)                                                                                                                                                                                                                                                                                                                                                                                                                                                                                                                                                                                                                                                                                                                                                                                                                                                                                                                                                                                                                                                                                                                                                                                                                                                                                                                                                                                                                                                                                                                                                                                                                                                                                                                                   | Mr Błażej Marciniak   |
| <b>Abstract:</b>                                     | <p><b>Background</b></p> <p>Recent advances in ancient DNA (aDNA) studies, especially in increasing isolated DNA yields and quality, opened the possibility of analysis of ancient host microbiome. However, this analysis could lead to numerous pitfalls, including spurious identification of pathogens based on fragmentary data or environmental contamination, leading to incorrect epidemiological conclusions. Within the Mycobacterium genus, MTBC (Mycobacterium tuberculosis complex) members responsible for tuberculosis share up to ~99% genomic sequence identity, while other more distantly related MOTT (Mycobacteria other than tuberculosis) can be causative agents for pulmonary diseases or soil dwellers. Therefore, reliable determination of species complex is highly relevant for interpretation of sequencing results.</p> <p><b>Results</b></p> <p>Here we present a novel bioinformatical approach, used for screening of ancient tuberculosis in sequencing data, derived from 28 individuals (dated 4400 - 4000 BC and 3100 - 2900 BC) from Central Poland. We demonstrate that cost effective next generation sequencing data (c.a 20M reads per sample) could yield enough information to provide statistically supported identification of probable ancient disease cases.</p> <p><b>Conclusions</b></p> <p>Application of appropriate bioinformatic tools, including an unbiased selection of genomic alignment targets for species specificity, makes it possible to extract valid data from full-sample sequencing results (without subjective targeted enrichment procedures). This approach broadens the potential scope of paleoepidemiology both to older, suboptimally preserved samples and to pathogens with difficult intrageneric taxonomy.</p> |                       |
| <b>Corresponding Author:</b>                         | Dominik Strapagiel<br>University of Lodz<br>Lodz, POLAND                                                                                                                                                                                                                                                                                                                                                                                                                                                                                                                                                                                                                                                                                                                                                                                                                                                                                                                                                                                                                                                                                                                                                                                                                                                                                                                                                                                                                                                                                                                                                                                                                                                                                                                                        |                       |
| <b>Corresponding Author Secondary Information:</b>   |                                                                                                                                                                                                                                                                                                                                                                                                                                                                                                                                                                                                                                                                                                                                                                                                                                                                                                                                                                                                                                                                                                                                                                                                                                                                                                                                                                                                                                                                                                                                                                                                                                                                                                                                                                                                 |                       |
| <b>Corresponding Author's Institution:</b>           | University of Lodz                                                                                                                                                                                                                                                                                                                                                                                                                                                                                                                                                                                                                                                                                                                                                                                                                                                                                                                                                                                                                                                                                                                                                                                                                                                                                                                                                                                                                                                                                                                                                                                                                                                                                                                                                                              |                       |
| <b>Corresponding Author's Secondary Institution:</b> |                                                                                                                                                                                                                                                                                                                                                                                                                                                                                                                                                                                                                                                                                                                                                                                                                                                                                                                                                                                                                                                                                                                                                                                                                                                                                                                                                                                                                                                                                                                                                                                                                                                                                                                                                                                                 |                       |
| <b>First Author:</b>                                 | Paulina Borówka                                                                                                                                                                                                                                                                                                                                                                                                                                                                                                                                                                                                                                                                                                                                                                                                                                                                                                                                                                                                                                                                                                                                                                                                                                                                                                                                                                                                                                                                                                                                                                                                                                                                                                                                                                                 |                       |
| <b>First Author Secondary Information:</b>           |                                                                                                                                                                                                                                                                                                                                                                                                                                                                                                                                                                                                                                                                                                                                                                                                                                                                                                                                                                                                                                                                                                                                                                                                                                                                                                                                                                                                                                                                                                                                                                                                                                                                                                                                                                                                 |                       |
| <b>Order of Authors:</b>                             | Paulina Borówka                                                                                                                                                                                                                                                                                                                                                                                                                                                                                                                                                                                                                                                                                                                                                                                                                                                                                                                                                                                                                                                                                                                                                                                                                                                                                                                                                                                                                                                                                                                                                                                                                                                                                                                                                                                 |                       |

|                                                |                                                                                                                                                                                                                                                                                                                                                                                                                                                                                                                                                                                                                                                                                                                                                                                                                                                                                                                                                                                                                                                                                                                                                                                                                                                                                                                                                                                                                                                                                                                                                                                                                                                                                                                                                                                                                                                                                                                                                                                                                                                                                                                                                                                                                                                                                                                                                                                                                                                                                                                                                                                                                                                                                                                                                                                                                                                                                                                                                                                                                                                                                                                                                                                                                                                                                                                                                                                                                                                                                                                                      |
|------------------------------------------------|--------------------------------------------------------------------------------------------------------------------------------------------------------------------------------------------------------------------------------------------------------------------------------------------------------------------------------------------------------------------------------------------------------------------------------------------------------------------------------------------------------------------------------------------------------------------------------------------------------------------------------------------------------------------------------------------------------------------------------------------------------------------------------------------------------------------------------------------------------------------------------------------------------------------------------------------------------------------------------------------------------------------------------------------------------------------------------------------------------------------------------------------------------------------------------------------------------------------------------------------------------------------------------------------------------------------------------------------------------------------------------------------------------------------------------------------------------------------------------------------------------------------------------------------------------------------------------------------------------------------------------------------------------------------------------------------------------------------------------------------------------------------------------------------------------------------------------------------------------------------------------------------------------------------------------------------------------------------------------------------------------------------------------------------------------------------------------------------------------------------------------------------------------------------------------------------------------------------------------------------------------------------------------------------------------------------------------------------------------------------------------------------------------------------------------------------------------------------------------------------------------------------------------------------------------------------------------------------------------------------------------------------------------------------------------------------------------------------------------------------------------------------------------------------------------------------------------------------------------------------------------------------------------------------------------------------------------------------------------------------------------------------------------------------------------------------------------------------------------------------------------------------------------------------------------------------------------------------------------------------------------------------------------------------------------------------------------------------------------------------------------------------------------------------------------------------------------------------------------------------------------------------------------------|
|                                                | Lukasz Pułaski                                                                                                                                                                                                                                                                                                                                                                                                                                                                                                                                                                                                                                                                                                                                                                                                                                                                                                                                                                                                                                                                                                                                                                                                                                                                                                                                                                                                                                                                                                                                                                                                                                                                                                                                                                                                                                                                                                                                                                                                                                                                                                                                                                                                                                                                                                                                                                                                                                                                                                                                                                                                                                                                                                                                                                                                                                                                                                                                                                                                                                                                                                                                                                                                                                                                                                                                                                                                                                                                                                                       |
|                                                | Błażej Marciniak                                                                                                                                                                                                                                                                                                                                                                                                                                                                                                                                                                                                                                                                                                                                                                                                                                                                                                                                                                                                                                                                                                                                                                                                                                                                                                                                                                                                                                                                                                                                                                                                                                                                                                                                                                                                                                                                                                                                                                                                                                                                                                                                                                                                                                                                                                                                                                                                                                                                                                                                                                                                                                                                                                                                                                                                                                                                                                                                                                                                                                                                                                                                                                                                                                                                                                                                                                                                                                                                                                                     |
|                                                | Beata Borowska-Strugińska                                                                                                                                                                                                                                                                                                                                                                                                                                                                                                                                                                                                                                                                                                                                                                                                                                                                                                                                                                                                                                                                                                                                                                                                                                                                                                                                                                                                                                                                                                                                                                                                                                                                                                                                                                                                                                                                                                                                                                                                                                                                                                                                                                                                                                                                                                                                                                                                                                                                                                                                                                                                                                                                                                                                                                                                                                                                                                                                                                                                                                                                                                                                                                                                                                                                                                                                                                                                                                                                                                            |
|                                                | Jarosław Dziadek                                                                                                                                                                                                                                                                                                                                                                                                                                                                                                                                                                                                                                                                                                                                                                                                                                                                                                                                                                                                                                                                                                                                                                                                                                                                                                                                                                                                                                                                                                                                                                                                                                                                                                                                                                                                                                                                                                                                                                                                                                                                                                                                                                                                                                                                                                                                                                                                                                                                                                                                                                                                                                                                                                                                                                                                                                                                                                                                                                                                                                                                                                                                                                                                                                                                                                                                                                                                                                                                                                                     |
|                                                | Elżbieta Żądzińska                                                                                                                                                                                                                                                                                                                                                                                                                                                                                                                                                                                                                                                                                                                                                                                                                                                                                                                                                                                                                                                                                                                                                                                                                                                                                                                                                                                                                                                                                                                                                                                                                                                                                                                                                                                                                                                                                                                                                                                                                                                                                                                                                                                                                                                                                                                                                                                                                                                                                                                                                                                                                                                                                                                                                                                                                                                                                                                                                                                                                                                                                                                                                                                                                                                                                                                                                                                                                                                                                                                   |
|                                                | Wiesław Lorkiewicz                                                                                                                                                                                                                                                                                                                                                                                                                                                                                                                                                                                                                                                                                                                                                                                                                                                                                                                                                                                                                                                                                                                                                                                                                                                                                                                                                                                                                                                                                                                                                                                                                                                                                                                                                                                                                                                                                                                                                                                                                                                                                                                                                                                                                                                                                                                                                                                                                                                                                                                                                                                                                                                                                                                                                                                                                                                                                                                                                                                                                                                                                                                                                                                                                                                                                                                                                                                                                                                                                                                   |
|                                                | Dominik Strapagiel                                                                                                                                                                                                                                                                                                                                                                                                                                                                                                                                                                                                                                                                                                                                                                                                                                                                                                                                                                                                                                                                                                                                                                                                                                                                                                                                                                                                                                                                                                                                                                                                                                                                                                                                                                                                                                                                                                                                                                                                                                                                                                                                                                                                                                                                                                                                                                                                                                                                                                                                                                                                                                                                                                                                                                                                                                                                                                                                                                                                                                                                                                                                                                                                                                                                                                                                                                                                                                                                                                                   |
|                                                | Łukasz Pułaski                                                                                                                                                                                                                                                                                                                                                                                                                                                                                                                                                                                                                                                                                                                                                                                                                                                                                                                                                                                                                                                                                                                                                                                                                                                                                                                                                                                                                                                                                                                                                                                                                                                                                                                                                                                                                                                                                                                                                                                                                                                                                                                                                                                                                                                                                                                                                                                                                                                                                                                                                                                                                                                                                                                                                                                                                                                                                                                                                                                                                                                                                                                                                                                                                                                                                                                                                                                                                                                                                                                       |
| <b>Order of Authors Secondary Information:</b> |                                                                                                                                                                                                                                                                                                                                                                                                                                                                                                                                                                                                                                                                                                                                                                                                                                                                                                                                                                                                                                                                                                                                                                                                                                                                                                                                                                                                                                                                                                                                                                                                                                                                                                                                                                                                                                                                                                                                                                                                                                                                                                                                                                                                                                                                                                                                                                                                                                                                                                                                                                                                                                                                                                                                                                                                                                                                                                                                                                                                                                                                                                                                                                                                                                                                                                                                                                                                                                                                                                                                      |
| <b>Response to Reviewers:</b>                  | <p>Lodz, 7th of April, 2019<br/> Dear GigaScience Editor,<br/> We appreciate the insightful and detailed comments of the reviewers. We included all the minor language-related corrections in the resubmitted manuscript. Following is a point-by-point reply to the major points raised by the reviewers.</p> <p>Reviewer 1</p> <ol style="list-style-type: none"> <li>1. Our statistical approach, as we state directly in the manuscript, is aimed at finding positive outliers in a pool of samples with unknown presence of mycobacterial sequences. When applied to a dataset like Kay et al., which consists exclusively of individuals with previously confirmed ancient mycobacterial infection, its outcome is therefore necessarily limited to identifying the outliers with highest microbial load (in the case of tuberculosis, potentially those individuals who died during the active phase of the disease) - these outliers being by definition always a minority of analysed samples. This explanation is provided in the text of the manuscript.</li> <li>2. We have performed the MapDamage analysis suggested by the reviewer and it indeed yielded a positive result - we thank the reviewer for this suggestion as this strengthened our conclusions significantly. We have now included a new Supplementary Fig. 4, and we have reworded both the legend to Supplementary Fig. 3 and the sentences in the manuscript that refer to it.</li> <li>3. Libraries were build using Meyer et al. (2010) protocol with modifications proposed by Gamba et al. (2014). We have performed mapDamage analysis in the way which fit to double stranded libraries. Information about different Meyer protocol and single stranded libraries was incorrectly added to previous version of the manuscript.</li> <li>4. We have expanded Supplementary Tab. 2 to include the absolute numbers of reads - both total and aligning to each alignment target.</li> </ol> <p>Reviewer 2</p> <ol style="list-style-type: none"> <li>1. We have now expanded the analysis of state of the art in biochemical detection of ancient mycobacteria by citing recent articles mentioning improvements in cell wall component analysis.</li> <li>2. Indeed, Pott's disease is usually regarded as pathognomonic signature of TB. When we said that many pathological conditions of the spine can mimic Pott's disease thought that they can be diagnosed mistakenly as tuberculosis, especially in practice with poorly preserved skeletons. The present text has been appropriately modified (both in the Introduction and Discussion) to clarify this statement. Moreover, according to the Reviewer's suggestion, the list of pathological conditions has been replaced with the Table S1, which include a short description of basic differences between these lesions and bone tuberculosis.</li> </ol> <p>Dear Editor, regarding to your comment:<br/> "As your revised manuscript focuses more on a method, it may be more suitable as a "Technical Note" rather than a "research article" "</p> <p>We would like to proceed this manuscript as research paper. In our work we present original dataset which allow us to present a novel bioinformatical approach, used for screening of ancient tuberculosis in sequencing data, derived from 28 individuals (dated 4400 - 4000 BC and 3100 - 2900 BC) from Central Poland. That dataset was not previously published elsewhere.</p> <p>Sincerely,<br/> Dominik Strapagiel</p> |

| Additional Information:                                                                                                                                                                                                                                                                                                                                                                                                                                                                                                             |          |
|-------------------------------------------------------------------------------------------------------------------------------------------------------------------------------------------------------------------------------------------------------------------------------------------------------------------------------------------------------------------------------------------------------------------------------------------------------------------------------------------------------------------------------------|----------|
| Question                                                                                                                                                                                                                                                                                                                                                                                                                                                                                                                            | Response |
| Are you submitting this manuscript to a special series or article collection?                                                                                                                                                                                                                                                                                                                                                                                                                                                       | No       |
| <p><b>Experimental design and statistics</b></p> <p>Full details of the experimental design and statistical methods used should be given in the Methods section, as detailed in our <a href="#">Minimum Standards Reporting Checklist</a>. Information essential to interpreting the data presented should be made available in the figure legends.</p> <p>Have you included all the information requested in your manuscript?</p>                                                                                                  | Yes      |
| <p><b>Resources</b></p> <p>A description of all resources used, including antibodies, cell lines, animals and software tools, with enough information to allow them to be uniquely identified, should be included in the Methods section. Authors are strongly encouraged to cite <a href="#">Research Resource Identifiers</a> (RRIDs) for antibodies, model organisms and tools, where possible.</p> <p>Have you included the information requested as detailed in our <a href="#">Minimum Standards Reporting Checklist</a>?</p> | Yes      |
| <p><b>Availability of data and materials</b></p> <p>All datasets and code on which the conclusions of the paper rely must be either included in your submission or deposited in <a href="#">publicly available repositories</a> (where available and ethically appropriate), referencing such data using a unique identifier in the references and in the “Availability of Data and Materials” section of your manuscript.</p>                                                                                                      | Yes      |

Have you have met the above requirement as detailed in our [Minimum Standards Reporting Checklist](#)?

[Click here to view linked References](#)

## Screening methods for detection of ancient *Mycobacterium tuberculosis* complex fingerprints in NGS data derived from skeletal samples

Paulina Borówka<sup>1</sup>, Łukasz Pułaski<sup>2,3</sup>, Błażej Marciniak<sup>4,5</sup>, Beata Borowska-Strugińska<sup>1</sup>, Jarosław Dziadek<sup>3</sup>, Elżbieta Żądzińska<sup>1</sup>, Wiesław Lorkiewicz<sup>1,#</sup>, Dominik Strapagiel<sup>4,5,#</sup>

1 Department of Anthropology, Faculty of Biology and Environmental Protection, University of Lodz, 90-237 Łódź, Poland;

2 Department of Molecular Biophysics, Faculty of Biology and Environmental Protection, University of Lodz, 90-237 Łódź, Poland;

3 Institute of Medical Biology, Polish Academy of Sciences, 93-232 Łódź, Poland;

4 Biobank Lab, Faculty of Biology and Environmental Protection, Department of Molecular Biophysics, University of Lodz, 90-231 Łódź, Poland;

5 BBMRI.pl Consortium, 54-066 Wrocław, Poland.

Corresponding author:

Dominik Strapagiel, Biobank Lab, Department of Molecular Biophysics, Faculty of Biology and Environmental Protection, University of Lodz, Pilarskiego 14, 90-231 Łódź, Poland, +48426655702, dominik.strapagiel@biol.uni.lodz.pl

Wiesław Lorkiewicz, Department of Anthropology, Faculty of Biology and Environmental Protection, University of Lodz, 90-237 Łódź, Poland, +48426354456, wieslaw.lorkiewicz@biol.uni.lodz.pl

### Abstract

1        **Background:** Recent advances in ancient DNA (aDNA) studies, especially in increasing isolated DNA yields and quality, opened the  
2 possibility of analysis of ancient host microbiome. However, this analysis could lead to numerous pitfalls, including spurious identification of  
3 pathogens based on fragmentary data or environmental contamination, leading to incorrect epidemiological conclusions. Within the  
4 *Mycobacterium* genus, MTBC (*Mycobacterium tuberculosis* complex) members responsible for tuberculosis share up to ~99% genomic  
5 sequence identity, while other more distantly related MOTT (*Mycobacteria* other than *tuberculosis*) can be causative agents for pulmonary  
6 diseases or soil dwellers. Therefore, reliable determination of species complex is highly relevant for interpretation of sequencing results.

7        **Results:** Here we present a novel bioinformatical approach, used for screening of ancient tuberculosis in sequencing data, derived from  
8 28 individuals (dated 4400 - 4000 BC and 3100 - 2900 BC) from Central Poland. We demonstrate that cost effective next generation screening  
9 sequencing data (c.a 20M reads per sample) could yield enough information to provide statistically supported identification of probable ancient  
10 disease cases.

11        **Conclusions:** Application of appropriate bioinformatic tools, including an unbiased selection of genomic alignment targets for species  
12 specificity, makes it possible to extract valid data from full-sample sequencing results (without subjective targeted enrichment procedures). This  
13 approach broadens the potential scope of paleoepidemiology both to older, suboptimally preserved samples and to pathogens with difficult  
14 intrageneric taxonomy.

### 15 **Keywords**

16 **ancient DNA, aTB, ancient tuberculosis, NGS**

## 17 **Background**

18 A rapid population growth initiated in the Neolithic period, connected with domestication of animals and increase of human sedentism,  
19 played a key role in pathogen transmission within the so-called first epidemiological transition[1-4]. The identification of infectious diseases and  
20 selection of unique fingerprints of their causative agents, especially those derived from skeletal elements, are still of the greatest interest for  
21 paleopathologists and anthropologists, which is evidenced by the range of available analysis methods. Members of the *Mycobacterium*  
22 *tuberculosis* complex (MTBC) are genetically very closely related and are causative agents for one of the oldest human infectious diseases –  
23 tuberculosis (TB). It is a disease that may leave lesions on patients' bones, enabling a diagnosis based on bone morphology [5]. The main  
24 problem of paleopathological diagnoses based solely on dry bones is that TB-related bone changes are often nonspecific. The most reliable  
25 skeletal indicator of TB are destructive lesions in thoracic and lumbar spine sections, which can lead to destruction and collapse of vertebral  
26 bodies, resulting in spinal kyphosis, or gibbus, known as Pott's disease [5-7]. However, there are several pathological conditions which could  
27 mimic TB in dry bone leading to erroneous diagnosis, especially when they affect the spine (Supplementary Tab. 1). Although their differential  
28 diagnosis from TB is well known in paleopathology it could be problematic to use it in analysis of often poorly preserved archaeological human  
29 remains[8, 9]. Diagnoses based on bone lesions in other region of the skeleton are even more tentative; these are primarily based on  
30 osteomyelitis of the joints (most commonly the hip and knee, but also ankle and elbow) and periosteal reactive lesions (mainly in the ribs or  
31 diaphysis of the long bones, including tubular bones of the hands and feet in children [6, 9]. Bone lesions from TB in nonspinal locations may be  
32 indistinguishable from those of other etiologies[5, 6] . Lastly, morphological studies of bones do not permit detection of many individuals  
33 affected with TB in past human populations: data from the pre-antibiotic era show that bone changes occur only in about 3–7% of individuals  
34 with active TB [9].

35 Since the 1990s, new possibilities to diagnose TB in archaeological specimens have arisen, offered by the detection and analysis of  
36 mycobacterial DNA and other biomolecules specific to MTBC at the molecular level [10-21]. A common complication in molecular studies for  
37 ancient MTBC detection is the presence of DNA and other metabolites from the whole microbiome of the individual whose remains are being  
38 analysed as well as from environmental bacteria that have colonised the skeleton *post-mortem* [22, 23]. These contaminants might include  
39 Mycobacteria other than *M. tuberculosis* (MOTT), some of which are prevalent in the environment, while others are associated with clinical  
40 cases of non-tuberculosis diseases [22, 24-26]. It should be emphasized that members of *Mycobacterium tuberculosis* complex themselves are  
41 characterized by a particular high sequence similarity [27, 28], which leads to often unsurmountable difficulties in distinguishing them on the  
42 molecular level.

43 Detection of cell wall components such as mycolic, mycocerosic and mycolipenic acids [13, 15, 18, 19] with matrix-assisted laser  
44 desorption/ionization tandem time of flight (MALDI-TOF) which present profiles specific for MTBC is considered a reliable method to identify  
45 ancient causative agents in human archaeological samples. Initial attempts to use mass spectrometry to detect cell wall lipids were shown to be  
46 erroneous in some cases [15, 29, 30]. In more recent studies, the combination of cell wall lipid analysis with genetic markers showed significant  
47 improvement in discriminative ability for ancient mycobacteria [31, 32]. Polymerase chain reaction, followed by gel electrophoresis, is still a  
48 popular method for detection of MTBC ancient DNA in human samples such as bones and teeth [32-34], mummified soft tissues [35, 36], or  
49 calcified pleura [10]. Known cases of tuberculosis disease proven on the basis of ancient DNA derived from human material are old as 9000 BC  
50 [37], through Iron Age [38] and up to modern times [39]. However, PCR-based methods have not been without controversy due to the possibility  
51 of cross-contamination as well as limitations of selection of proper sequences. While repetitive insertion sequences, e.g. IS6110 and IS1081, are  
52 widely used and sometimes considered as a biomarker specific to MTBC bacteria [34], the current consensus recommends strong caution in their

53 use due to their presence in MOTT bacteria. Those commonly used markers have even been found to occur in soil mycobacteria [40-45], and  
54 even weak homology can cause false-positive PCR results for unrelated microbes [40, 46].

55 Recently, next generation sequencing (NGS) methods were introduced for detection of causative agents of ancient diseases [47, 48],  
56 including MTBC, with or without pre-enrichment of MTBC aDNA [49-52]. The increasing quantity of data generated by NGS and efficiency of  
57 non-Sanger-based sequencing platforms requires a new approach in processing tools: suitable bioinformatic pipelines are required for reliable  
58 DNA analysis of ancient causative agents. Similar to PCR, where the use of only short conserved regions considered as specific for MTBC may  
59 lead to false positive results, improper analysis of NGS data can misinterpret sequences from modern known or unknown environmental  
60 *Mycobacteria* which are present in ancient human skeletons [26]. New analytical tools for more unequivocal answers to questions of  
61 identification and differentiation of *ante-mortem* causative from *post-mortem* non-causative microbial agents are urgently needed. Application of  
62 specifically designed *in silico* (bioinformatical approach) verification methods for improved downstream processing of molecular fingerprint  
63 data from ancient samples is necessary for drawing conclusions on clinical prevalence and epidemiology of pathogenic mycobacteria in history.  
64 Here we present an improved strategy for specific identification of bacteria from the *M. tuberculosis* complex in ancient non-enriched NGS data.  
65 The main purpose of this study was to design an unbiased genomic marker alignment query composed of sequences belonging strictly to MTBC  
66 members. Therefore, we present a workflow including appropriate bioinformatic alignment algorithms and statistical tools that allowed the  
67 identification of tuberculosis causative agents, using fragment length variation to balance selectivity (species specificity) with sensitivity of  
68 detection.

## 69 **Sample Description**

70 Ancient bone samples come from skeletal remains of 28 individuals representing two Neolithic populations from the Kujawy region in  
71 Central Poland: the Middle Neolithic Brześć Kujawski Group of the Lengyel culture (BKG), dated to ca. 4400-4000 BC (26 individuals) and the  
72 Late Neolithic Globular Amphora culture (GAC), dated to ca. 3100-2900 BC (2 individuals), previously described in [18, 53] (Supplementary  
73 Tab. 2). The skeletons come from two archaeological sites, BK 3 and BK 4, which represent relics of a settlement and cemetery of the BKG  
74 culture with some secondary objects within them, like the GAC grave. Both sites overlap each other, thus soil conditions and diagenetic agents  
75 were similar for all skeletal remains analyzed. Bone material was taken mainly from vertebral bodies of individuals with well-preserved  
76 skeletons. One of two individuals belonging to the GAC revealed bone lesions consistent with Pott's disease. BKG samples provided more  
77 ambiguous evidence of skeletal lesions. One individual showed destructive lesions of the thoracic and lumbar vertebrae with central collapse of  
78 the vertebral bodies which may indicate tuberculous spondylodiscitis. Three other individuals of this population revealed only relatively mild  
79 and nonspecific inflammatory bone changes in the postcranial skeleton which were located on the internal surface of the ribs, tibia and femur  
80 shafts, as well as foot bones.

## 81 **Analyses**

### 82 **Reference target construction (alignment target)**

83 As our main reference sequence, we used the most commonly applied modern laboratory strain of *M. tuberculosis* (MTB), H37Rv, for  
84 which the whole genomic sequence is available. In order to select a subset of this reference sequence as an alignment target providing enhanced  
85 specificity for tuberculosis-causing agents (MTBC members), we first derived a set of all protein-coding sequences (CDS) from the H37Rv  
86 genome using the RAST tool [54]. These 4,360 sequences were screened using the BLAST tool (Megablast) at the National Library of Medicine  
87 sequentially against 12 available genomic sequences of selected MOTT: *M. kansasii*, *M. avium subsp. paratuberculosis*, *M. ulcerans*, *M.*  
88 *smegmatis*, *M. fortuitum*, *M. haemophilum*, *M. marinum*, *M. simiae*, *M. asiaticum*, *M. xenopi*, *M. phlei*, *M. abscessus*. Any detected similarities  
89 (gapless alignments >10 bp) between a H37Rv CDS and any MOTT genomic sequences resulted in the exclusion of this CDS from the result

90 dataset, which was therefore restricted to sequences fully specific for MTBC, having no homologs in any MOTT genome. The resulting set of  
91 sequences was subsequently called the Borówka et al. alignment target and consisted of 1,534 coding sequences with total sequence length of  
92 0.814 Mbp. Since no sequences from other MTBC species were used at this stage, and it is known that they exhibit up to 99.9% nucleotide  
93 sequence similarity [55], the constructed alignment target cannot be considered specific only for *M. tuberculosis*, but rather for the whole  
94 MTBC; this is justified in epidemiological studies on ancient samples by the need to include all clinically equivalent causative agents for the  
95 same disease entity: tuberculosis. For comparison purposes, we prepared and used two literature-derived, knowledge-based H37Rv sequence  
96 subsets as alternative alignment targets: the c. 0.046 Mbp sequence used for capture enrichment in Bouwman et al. (2012) [52] for sequencing  
97 mycobacterial samples from a 19th century skeleton, subsequently called the Bouwman et al. alignment target, and the two genes (*katG* and  
98 *mpt40*, total length 0.004 Mbp) listed as MTBC-specific among the capture enrichment probes used by Bos et al. (2014) [50] for sequencing  
99 mycobacterial samples from 11th-13th century Peruvian skeletons, subsequently called the Bos et al. alignment target. All the reference  
100 sequences were prepared for alignment by indexing with the suffix array - induced sorting algorithm, implemented in the BWA software  
101 package (BWA).

102 Since the construction of the Borówka et al. alignment target was based on elimination of sequences similar to other mycobacterial  
103 species, we reasoned that the performance of an alignment target is directly linked to the number of similarities between the MTB genome and  
104 other potentially interfering mycobacterial species (both ancient and environmental) present in the ancient host-derived sample. In order to  
105 quantify this, we subjected the publicly available genome sequences of *Mycobacterium* species to an *in-silico* procedure to generate collections  
106 of short sequences broadly analogous to authentic NGS reads. Including reads below a certain length in similarity analysis of ancient microbial  
107 DNA leads to non-specific matches (for both evolutionary and statistical reasons); this threshold is usually arbitrarily set to around 30 bp, but a  
108 broader analysis might make it easier to construct a reliable algorithm for detection of specific ancient pathogens. Therefore, in our further  
109 analysis both of reference and authentic ancient NGS sequences we extracted groups (bins) of non-human sequences over several length  
110 thresholds:  $\geq 20$ bp,  $\geq 25$ bp,  $\geq 30$ bp and  $\geq 35$ bp, to enable a thorough analysis of specificity gain upon increase in minimal sequence length. For  
111 reference *Mycobacterium* genomes, k-mers of specified length (corresponding to the lower limit of read length for NGS bins: 20, 25, 30 or 35)  
112 were filtered against the human genome assembly hg19, and the resulting "short read" collections were aligned to the full MTB reference  
113 genome or its selected subsets (Borówka et al., Bouwman et al. and Bos et al. alignment targets). Table 1 shows the respective number of  
114 genomic k-mers from MTB complex and MOTT species which match the MTBC alignment targets as well as the total lengths of assayed  
115 genomes for comparison. Since the various subsets of the MTB genome differ in length and thus the probability of random match increases with  
116 target length, we standardised the obtained data by presenting it as a percentage of k-mers from a given mycobacterial genome that match the  
117 alignment target, divided by the ratio of target length to the full MTB genome length (genomic coverage of the target). These values, which are  
118 an inverse measure of alignment target specificity (they increase if more "reads" from a species which is not MTB or MTBC can be mistaken for  
119 MTBC), are shown in Table 1. As a reference, the MTB genome itself was also subjected to this procedure - obviously, the match percentage  
120 values are almost 100% here. Several conclusions can be drawn from these data: firstly, it is obvious that selecting longer reads (in this case  
121 longer k-mers) for comparison increases specificity, with reads 30 bp long or longer optimal for specific identification of the MTB complex,  
122 reflecting a common consensus in the field. However, it is important to note that shorter reads still add important information to the analysis, as  
123 the rate of specificity increase (decrease in matching read percentage with increase in read length) varies between species (i.e. some species have  
124 longer stretches of highly similar sequence to MTB). For example, while *M. smegmatis* has a very high match percentage to the Borowka et al.  
125 alignment target at low read length, this is rapidly lost at longer (more genuine) read lengths; the opposite is true e.g. for *M. marinum*. It is a  
126 derivation of the evolutionary history of the genus, but in this case also a practical caveat for further interpretation of sequence matches in actual  
127 aDNA samples. Moreover, the specificity of various alignment targets varies, with the Borówka et al. target being consistently the most specific



128 (for longer k-mers) for distinguishing MOTT, while it is (by design) not well suited to distinguishing other members of the MTB complex from  
129 MTB itself.

130 Since we intended to develop a highly specific screening test (based on low depth sequencing strategy) for verification of MTBC  
131 infection in Neolithic samples with *a priori* relatively low degree of aDNA preservation, we decided on a statistical approach. Since any  
132 preserved ancient mycobacterial DNA would be only a fraction of total aDNA, and it in turn would only be a fraction of total reads (the balance  
133 being the modern environmental metagenome), a balance between sensitivity and specificity in verifying this very low number of reads must be  
134 struck. In sedentary, communal populations MTBC infection tends to be epidemic in character, but in most individuals with latent infection the  
135 microbial load (and thus the probability of DNA survival in ancient samples) is relatively low and constant. Any similarity analysis based on  
136 sequence alignment will also invariably generate false positive alignment hits, thus, it would be impossible to construct a test with sufficient  
137 statistical power to distinguish individuals genuinely free of ancient MTBC and those with average/modest latent infection. Therefore, we  
138 concentrated on the detection of outlier individuals with high microbial load (which may be later selected for enrichment-based further genetic  
139 analysis, such as phylogenetic studies or genome reconstruction), measured by the positive read ratio (the intrinsically very low ratio of reads  
140 matching the MTBC alignment target to all eligible reads). Based on the epidemiology of MTBC infection, we assumed a quasi-normal  
141 distribution of positive read ratios in a randomly selected sample of ancient individuals, with outliers as candidates for active tuberculosis and for  
142 selection for more in-depth studies. Thus, our method was based on standardising read ratio values to normal distribution parameters (arithmetic  
143 mean and standard deviation) and, as a further step in the detection algorithm for ancient tuberculosis (aTB), we applied a typical cutoff value of  
144  $1.5 \times \text{SD}$  to detect outliers.

145 As a first stage of testing our screening approach on actual NGS data from ancient material, we used a control dataset based on published  
146 NGS results of confirmed tuberculosis-infected individuals - 18th/19th-century mummified bodies from a crypt in Vác, Hungary, described by  
147 Kay et al. (2015) [48]. The aim of that study was to reconstruct and analyse historical genome sequences of *M. tuberculosis*, which resulted in  
148 sequencing results with high coverage. Since all these samples (26 bodies) were previously demonstrated by PCR to come from infected  
149 individuals [56], application of our screening procedure did not aim at distinguishing "positive" from "negative" samples, but at validating the  
150 selection of individuals with highest microbial load (especially since some of them were sampled from 1-3 different parts of the body), at the  
151 same time enhancing specificity (vs. MOTT). We used the Kay et al. dataset for verification of specificity of all applied alignment targets:  
152 Borówka et al., Bouwman et al., Bos et al. and the whole genome sequence of *M. tuberculosis* H37Rv, with our algorithm aimed at detection of  
153 strongest aTB outliers. While application of the Borówka et al. target sequence (with 30 bp read length cutoff) detected four samples as outliers,  
154 they turned out to belong only to two individuals (bodies 68 and 92) (Supplementary Tab. 3). This validated our approach as a suitable method  
155 for selecting ancient samples with highest MTBC genetic material content, especially since, despite our alignment target consisting only of  
156 sequences specific exclusively for MTBC, it turned out that those four samples were also those that showed the highest ratio of aligned reads to  
157 the full *M. tuberculosis* reference sequence (and thus the highest number of reads used to reconstruct the ancient genome) in the original study  
158 by Kay et al. (shown there in Supplementary Tab. 3). Moreover, only the two alignment targets prepared with both specificity and sensitivity in  
159 mind (Borówka et al. and Bouwman et al.) led to identification of all three samples from body 68 as outliers.

160 Subsequently, we applied the full statistical approach (with all four NGS read length bins) and the four selected genomic  
161 alignment targets: full reference *Mycobacterium tuberculosis* H37Rv genome (broadest possible target), two published targets consisting of  
162 rationally selected genes (applied previously to enrichment-based sequencing: Bouwman et al. and Bos et al.) as well as the novel specificity-  
163 tailored target (Borówka et al.), to the Neolithic samples from Brześć Kujawski. Table 2 presents the number of reads in each read length bin  
164 used for alignment with targets and statistical analysis, while Supplementary Tables 4-7 show the alignment results as numbers and ratios of  
165 matching reads. Fig. 1 presents the results of statistical analysis as outlying standardised ratio values in different read length bins. Overall, the  
166 expected population structure of majority of individuals with few positive reads and outlier individuals with an exceptional number of positive

167 reads is confirmed. However, it is immediately obvious that the composition of outlier individuals depends strongly not only on the genomic  
168 alignment target, but also on minimum length of reads used for the alignment. There are individuals who remain positive (with a high relative  
169 ratio of reads aligning to the respective target) for all four length bins (e.g. 4\_BK4 for the *Mycobacterium tuberculosis* H37Rv target), i.e. the  
170 share of putative MTBC-derived sequences remains constant despite the decrease in number of analysed sequences and increase in sequence  
171 complexity. There are individuals who, despite being outliers for the bins including shorter reads, lose this status for the more restrictive bins  
172 (e.g. 55\_BK4 for the Borówka et al. target), i.e. the majority of their MTBC-like sequences were of low complexity. Contrastingly, in some  
173 individuals the share of MTBC-like sequences increases above the cut off value only for bins with longer reads (e.g. 31\_BK4 for the Borówka et  
174 al. target), i.e. most specifically aligned fragments are relatively long. It is again apparent that since most of this change concerns reads between  
175 20 and 29 bp in length, the optimal threshold for read aligning to a genomic target for specificity towards MTBC is  $\geq 30$  bp. Thus, the three  
176 individuals which exceed the threshold of  $1.5 \times SD$  for the MTBC-specific Borówka et al. target (17\_BK4, 29\_BK4 and 31\_BK4) are considered  
177 with high probability to be ancient cases of MTBC infection and merit selection for further in-depth studies by a more cost-intensive approach.

178 Since the cut off-based detection algorithm, while robust for the presented dataset, may be less suitable for other, less homogenous  
179 groups of ancient individuals, we also set out to construct an objective, parametric testing-based outlier detection algorithm. Since the main  
180 objective of our overall study is specificity of MTBC detection, we applied this algorithm to the original Borówka et al. genomic alignment  
181 target. Based on the observation that positive read ratio tends to depend monotonically on read length bin – either consistently increasing or  
182 decreasing for outlier individuals – we decided to calculate a monotonicity parameter. We first standardised positive read ratios as percentage of  
183 average positive read ratio (without assumptions towards normal distribution, Supplementary Fig. 1) and then calculated ratios of these values  
184 for adjoining read length bins ( $\geq 25\text{bp}/\geq 20\text{bp}$ ,  $\geq 30\text{bp}/\geq 25\text{bp}$  and  $\geq 35\text{bp}/\geq 30\text{bp}$ ). The arithmetic mean of these values (Supplementary Tab. 8)  
185 depended on monotonicity of the studied relationship and had a normal distribution among individuals in our study. For outlier detection, we  
186 applied a one-tailed critical z value test on both tails on the sample. We consider the positive outliers (individuals with consistently increasing  
187 share of positively aligned reads with increasing read length) to be potential individuals with high MTBC loads, suitable for further analysis both  
188 by virtue of good mycobacterial genomic material preservation and high certainty of this material belonging to ancient MTBC. On the other  
189 hand, negative outliers may either be individuals with ancient MOTT infection (we suggest this as highly probable for 4\_BK4) or samples with  
190 high proportion of short, non-specific alignments, probably due to environmental contamination (most probably 55\_BK4) - to distinguish these  
191 two groups, a comparison with the more *Mycobacterium*-generic whole-genome alignment target is necessary (see below). This approach, while  
192 retaining the strong specificity of the cut off approach, gains increased sensitivity due to inclusion of individuals with high background of  
193 environmental sequences (low initial positive alignments in the short-read bin) which nevertheless retain specific long positively aligned  
194 sequences upon read length restriction, e.g. 21\_BK4.

195 An immediately obvious result of our analysis was that the comparison of alignment targets constructed with different assumptions leads  
196 to surprisingly large differences in assignment of individuals. Aligning aDNA sequences versus the whole MTB genome results in identification  
197 of two strong outliers (4\_BK4 and 32\_BK4). The same two individuals are identified, albeit with a smaller divergence, by using the enrichment  
198 bait sequence set used by Bouwman et al. as alignment target. Since this subset of genomic sequences was originally selected for enrichment of  
199 lineage-distinguishing polymorphisms rather than for MTB complex specificity, this result is expected and confirms the efficiency of the outlier  
200 detection method and  $\geq 30\text{bp}$  as optimal read length. On the other hand, our Borówka et al. genomic subset selected on the basis of MTB  
201 complex specificity led to identification of three different individuals as outliers (17\_BK4, 29\_BK4 and 31\_BK4), while 4\_BK4 and 32\_BK4  
202 had positive read values close to average. This is even more conspicuous when positive ratio values for the two different alignment targets  
203 (whole genome and specific subset Borówka et al.) are plotted against each other (Fig. 2). In our opinion this points to the broadly recognized  
204 risk of mistakenly identifying ancient infections caused by MOTT as tuberculosis based on the extensive similarity between the respective  
205 mycobacterial genomes. While restricting the alignment target leads to loss of sensitivity due to unavoidable decrease of absolute number of

206 aligned reads, which is a significant problem for ancient DNA, it is offset by the increase in specificity of detection. This distinction is crucial for  
207 epidemiological hypotheses where elimination of false positives is of paramount importance. We further show this by aligning our reads to the  
208 purportedly MTBC-specific target sequences selected by Bos et al. (sequences of only two *M. tuberculosis* specific genes), where increase of  
209 specificity leads to detection of the 29\_BK4 individual, but the extreme loss of sensitivity linked to minuscule absolute number of reads (the  
210 highest number of positive reads in the  $\geq 30$ bp bin is 13 – see Supplementary Tab. 7) leads to high experimental noise and low reliability of  
211 assignment of individuals, and it is not recommended.

212 Since for two individuals which were strongly enriched in mycobacterial sequences (4\_BK4 and 32\_BK4) we posit the existence of an  
213 ancient MOTT infection (as they do not score highly in comparison with the specific Borówka et al. alignment target), we decided to verify if  
214 this assumption is supported by aligning the optimal read bin ( $\geq 30$ bp) to full genomes of other mycobacterial species as targets. Indeed, as seen  
215 in Supplementary Fig. 2, those two individuals are also strong outliers in read ratio values after aligning to the *M. marinum* genome - moreover,  
216 when plotted against read ratio values for the MTB genome, it is apparent that they show higher similarity to *M. marinum*, since they are located  
217 on the *M. marinum* side of the read ratio regression line. This finding validates our workflow in that it corroborates the usefulness of read length  
218 binning while further demonstrating the advantages of read aligning to targets selected for species discrimination (like the Borówka et al. target)  
219 which allow for immediate flagging of suspicious samples with spuriously high absolute similarity to the MTB genome. We have also attempted  
220 to verify the possibility of distinguishing samples with predominantly ancient mycobacterial sequences from samples with recent environmental  
221 MOTT contamination by performing mapDamage analysis. MapDamage analysis shows that the low absolute number of reads that map to all *M.*  
222 *tuberculosis* alignment targets (including the full MTB genome) in the case of our samples prevents us from drawing meaningful conclusions in  
223 this regard (even for the samples with highest read numbers - 4\_BK4, 32\_BK4, 17\_BK4, 29\_BK4, 31\_BK4). For general confirmation of  
224 ancient status of analysed reads, MapDamage analysis was performed for human sequences (aligning to the human genome build 37) and is  
225 presented in Supplementary Fig. 3 for all 6 individuals with potential MOTT and MTBC infections. Since the samples with potential MOTT  
226 infection (4\_BK4, 32\_BK4) included a substantial number of reads that aligned to the *M. marinum* genome (Supplementary Tab. 9), we were  
227 also able to perform MapDamage analysis for these reads (Supplementary Fig. 4), confirming the ancient character of mycobacterial sequences.

## 228 Discussion

229 The evolutionary and ecological complexity of mycobacteria, including the existence of a group of closely related pathogens known as  
230 the *Mycobacterium tuberculosis* complex, consists of a large number of more distantly related human and animal pathogens causing diseases  
231 other than tuberculosis, and an abundance of free-living (including soil- and water-borne) mycobacterial species in the environment. These all  
232 contribute to the difficulty in the unequivocal determination of ancient tuberculosis on the basis of MTBC aDNA. Present-day  
233 paleoepidemiology uses tools of classical biological anthropology as well as modern clinical diagnostics at the molecular level. Morphological  
234 diagnosis of tuberculosis is based on certain bone changes, especially those described as Pott's disease. This approach is not optimal from the  
235 point of view of sensitivity, since bone lesions are present only in 2% of all cases of tuberculosis infection and 10-20% of cases of  
236 extrapulmonary tuberculosis [41, 57]. The specificity of this tool is also relatively low: even in the case of Pott's disease, which is regarded by  
237 paleopathologists as the pathognomonic skeletal signature of TB, there are several lesions that may be difficult to differentiate from TB in  
238 archaeological skeletal remains. . In spite of that limitations, osteological analysis is often the main starting point of a study and cannot be  
239 disregarded. However, in our study the occurrence of bone lesions that could be linked in any way with tuberculosis did not correlate with the  
240 results of our genetic analyses. There are two possible explanations for this fact. First, the bone changes were not caused by tuberculosis, which  
241 is in accordance with a lack of pathognomonic characteristics of the disease on the skeleton alone, as was clarified before; it applies primarily to  
242 the graves 12\_BK4, 18\_BK4, 47\_BK4, and 73\_BK4. It may also be that the preservation of MTBC aDNA was too poor to pass the  
243 sensitivity/specificity threshold of the method proposed here.

244 Among molecular techniques which are used for diagnosis of ancient tuberculosis cases, both biochemical methods based on mass  
245 spectrometry and PCR amplification of marker sequences have been successfully used in literature, e.g. for preliminary description of the  
246 Hungarian mummies used subsequently to reconstruct aTB genomes [48, 56]. However, both these groups of methods suffer from a number of  
247 drawbacks which make them less useful in an ancient epidemiological context than in a contemporary one: environmental contamination from  
248 modern soil mycobacteria can overwhelm both traces of ancient MTBC mycolic acids and less specific PCR amplicons, while strong care must  
249 be taken to prevent in-lab cross-contamination with genuine MTBC samples. Therefore, NGS has a number of advantages in diagnosis of ancient  
250 tuberculosis, having the potential to be both highly sensitive and highly specific; but the balance between sensitivity and specificity depends on  
251 the selection of reference genomic sequences and crucially on the method of alignment. A large quantity of generated data allows potentially to  
252 detect ancient mycobacteria selectively, unequivocally and semi-quantitatively, while making possible additional analyses such as preservation  
253 period-related DNA damage pattern detection (e.g. mapDamage [58, 59], phylogenetic analysis of genetic kinship [50] or even full genome  
254 reconstruction [48]). Due to small absolute amounts of actual ancient pathogen DNA in most types of human body samples, a common approach  
255 is to use pre-sequencing enrichment (usually using probe capture, e.g. [50]). Only in bodies preserved in exceptional, isolated conditions, such as  
256 the Hungarian mummies from a 18th century crypt, was a non-enriched metagenomics approach used [48]. Use of enrichment techniques  
257 strongly increases sensitivity, but comes with its own drawbacks (apart from increased cost), the most relevant of which is the need to pre-design  
258 a set of sequences (probes or primers) that will define and limit the scope of subsequently obtained NGS data. A full metagenome approach is  
259 often more relevant when dealing with a highly ancient sample like in the present study, when neither the infection prevalence nor the pathogen  
260 identity are known to any precision and a preliminary NGS study is needed for formulation of specific hypotheses and pre-selection of  
261 individuals for further analysis.

262 However, in the case of ancient MTBC (especially samples more than a thousand years old), specificity is a more important consideration  
263 than sensitivity. While modern MTBC contamination in the laboratory is a risk factor, it would not mask ancient data in a semi-quantitative  
264 study and would be obvious if DNA damage analysis were performed. A more important consideration is the possible presence of ancient  
265 MOTT which can be unpredictably genetically similar to MTBC. The sources of these MOTT can be either soil contamination (including dead  
266 animals) which could have happened at any time since inhumation (preventing reliable elimination by DNA damage analysis), or actual ancient  
267 MOTT which were pathogenic/infectious/commensal to ancient humans. Thus, the design of sequencing analysis workflow has to take into  
268 account the necessity to filter out unknown related sequences that are not derived from MTBC - this was the main rationale behind the design of  
269 our study. While contamination with mycobacterial sequences within the laboratory (amplicons, genuine *Mycobacterium* DNA) can be  
270 prevented by correct workflow (separation of pre- and post-PCR areas etc.), equipment and strict procedures, contamination by environmental  
271 DNA is inescapable and has to be taken into account in the case of archaeological bone samples preserved by inhumation. Since for ancient  
272 samples direct contact of bones with the environment has lasted for a very long time (unlike more recent samples from vault inhumation),  
273 mycobacterial DNA derived from environmental (soil) MOTT can have undergone accretion in bones throughout this period, with some of it  
274 ancient enough to be indistinguishable in terms of location and state of preservation from DNA of infectious microbes buried with the body. All  
275 MTBC are obligate pathogens and thus are an unlikely source of environmental contamination of ancient samples. Therefore, for preliminary  
276 identification of potentially interesting samples in ancient inhumated bones, specificity in methods of detection of ancient infectious agents from  
277 this group should be developed towards exclusion of MOTT, with distinction between members of MTBC as a secondary, much less important  
278 goal. Since MTBC also share a very high proportion of coding sequences, achieving specificity for *M. tuberculosis* s.s. could occur only by  
279 drastically limiting the size of the reference marker sequence, thus leading to very low sensitivity, especially for usually highly degraded aDNA.  
280 Moreover, the division of MTBC into lineages is not entirely concordant with classical taxonomic division into species, so attempting an  
281 artificial distinction between some lineage groups based on accumulated NGS data would not be recommended. Our approach is designed as a  
282 relatively low-cost, first-pass classification of ancient samples based on whole-metagenome NGS data. When a highly specific method like the

283 one we propose is used to identify likely ancient MTBC infection, potential lineage determination or any other phylogenetic studies (in pre-  
284 selected samples) should proceed by other methods developed specifically for this purpose, based on the presence of lineage-specific  
285 polymorphisms (with the caveat that enrichment for specificity-related sequences before NGS will certainly lead to loss of the majority of  
286 phylogenetically important loci, so a full metagenomic sequencing round with sufficient coverage is inevitable).

287 We postulate that a combination of read length-based genomic alignment analysis and a careful knowledge-based selection of the  
288 alignment target makes it possible to achieve relatively high specificity of aTB detection against all potential false positive sources. Therefore, a  
289 robust tool for specifically identifying NGS-derived sequences that belong to ancient MTBC with high confidence is a priority task in molecular  
290 paleoanthropology. Even more relevant to paleoanthropological studies, confusion between MOTT and MTBC can lead to spurious  
291 identification of ancient individuals as tuberculosis sufferers or carriers, invalidating conclusions relevant to paleoepidemiology. We  
292 demonstrate that read length selection is not only highly relevant (as has been shown before and by us, only reads above ca. 30 bp can be used  
293 with high confidence), but when a statistics-based approach to multiple length thresholds is used, it can yield a substantial increase in specificity  
294 of MTBC identification. At the same time, selection of pre-filtered alignment target, with combined knowledge-based (selection of transcribed  
295 sequences) and automated (exclusion of sequences aligning with MOTT genomes) delineation of MTBC-specific sequences (which we call the  
296 Borówka et al. target), makes it possible to perform in-depth specificity analysis by comparing the alignments of *in silico* fragmented  
297 mycobacterial genomes (mimicking actual NGS data). Combining the novel alignment target and the read length binning approach, we were able  
298 to select with high confidence three ancient individuals with probable ancient MTBC infection and two further individuals with highly probably  
299 ancient mycobacteriosis caused by MOTT (which would be misidentified as tuberculosis if another alignment target or to short reads were taken  
300 into account). Of course the limitations of our data make these identifications preliminary and another round of directed (e.g. enrichment-based)  
301 sequencing would be required both for positive identification of the infectious agent and for potential phylogenetical analysis of its spatial and/or  
302 temporal kinship. However, in our case read length analysis allowed us to suggest *M. marinum* as the potential ancient infectious agent based on  
303 statistical analysis; obviously, positive confirmation of this diagnosis would require tools that are currently unavailable such as proven *M.*  
304 *marinum*-specific enrichment probes as well as a much better sequence coverage that could be achieved in a preliminary study (Supplementary  
305 Fig. 2). Still, this possible pathogen identification is not at odds with the archeological context as the inhumation site is next to a lake (Smetowo)  
306 and within a geographical region rich in post-glacial lakes (Kujawy), so some individuals could have had routine professional contact with fish.  
307 Our combined procedures used robust tools but cannot be treated as definite proof. Our samples are relatively old (in comparison to most other  
308 ancient tuberculosis cases studied by molecular means before) and thus the absolute read numbers from an unbiased NGS approach is low. We  
309 demonstrate that this disadvantage makes it relatively difficult to perform DNA damage analysis (except for samples with a very high absolute  
310 number of reads). However, we provide a consistent proof of concept for a tool which allows relatively cheap and unbiased selection of samples  
311 (e.g. individuals) for further analysis, e.g. by enrichment capture NGS. Thus, we suggest that it is possible to use global NGS results from  
312 ancient samples as an economical pre-screening tool for more complex methods, while applying bioinformatic tools to maximise the number of  
313 reliable conclusions that can be drawn from a limited dataset.

## 314 **Methods**

### 315 **Ancient DNA extractions**

316 A dedicated ancient DNA sample preparation facility at the University of Lodz was used, taking standard precautions to avoid any  
317 contamination. All disposable materials, buffers, water, clean room surfaces and bone material, were UV-irradiated for at least 30 minutes before  
318 any subsequent steps were taken. The fragments of bone material were isolated using Dremel disks, (USA), surface-cleaned, UV-irradiated for

319 7.5 minutes on each side, and ground into a fine powder, further used for DNA extraction procedures following the protocol of Dabney et al.  
320 with modifications [60-62]. Ancient DNA was successfully isolated from all bone samples (See Supplementary Fig. 3). Illumina libraries were  
321 prepared in separate facility, according to Meyer et al. protocol [63] with modifications proposed by Gamba et al. [60] without UDG treatment  
322 of the samples. All libraries were subjected to the screening next-generation sequencing on the Illumina Nextseq 500 platform (100bp single-end  
323 sequencing), yielding between 2.2 and 33.9 million reads per individual (median number of reads after incomplete and truncated read trimming –  
324 16.9 million reads per individual, Tab. 2). This dataset contains ancient human sequences from the deceased individuals, ancient microbial  
325 sequences from parasites, pathogens, commensals or symbionts of the deceased individuals, as well as genomic sequences from environmental  
326 organisms (mainly microbes, but also potentially higher Eukaryotes), to which the skeletal remains were exposed *post-mortem*.

### 327 **Bioinformatical procedures**

328 Raw NGS reads were subjected to standard quality processing such as trimming and adapter sequence removal (-q 30 --phred33 --  
329 illumina --length 20), using the Trim Galore! software package [64]. Since the predominant expected type of sequence in skeletal samples is  
330 ancient human genomic DNA and its presence would unnecessarily complicate our analysis, the read datasets were subsequently subjected to  
331 filtering by alignment to the standard (hg19) human genome reference sequence. This alignment was performed using the BWAaln algorithm (-  
332 n 0.04, -l 1000), with duplicate removal, using the AGAT software tool - ocwrapper3mt.py script [65]. Any read which aligned without gaps  
333 within the default mismatch rate (dependent on sequence length, e.g. 2 mismatches per 17 bp) was eliminated from the sample dataset.  
334 Subsequently, separate sub-datasets (bins) of reads were generated on the basis of (trimmed) read length: minimal read length threshold  $\geq 20$ bp,  
335  $\geq 25$ bp,  $\geq 30$ bp and  $\geq 35$ bp. These datasets were used for alignment to reference targets. These procedures were applied also to the Kay et al  
336 dataset, used for the Borówka et al. method verification.

337 Estimation of terminal base deamination damage pattern was done by using mapDamage2.0 analysis with specifying a length (-l) of  
338 75 bp (Supplementary Fig.3 and Supplementary Fig. 4).

339

### 340 **Query sequence preparation**

341 Selected 18 reference *Mycobacterial* genomes, including 5 of *M. tuberculosis* complex (underlined): *M. abscessus*, *M. africanum*, *M.*  
342 *asiaticum*, *M. avium*, *M. bovis*, *M. caprae*, *M. fortuitum*, *M. haemophilum*, *M. kansasii*, *M. leprae*, *M. marinum*, *M. microti*, *M. phlei*, *M. simiae*,  
343 *M. smegmati*, *M. tuberculosis*, *M. ulcerans*, *M. xenopi* were used. Nucleotide sequences of each organism have been subjected to fragmentation  
344 with FA\_TOOL script (small\_tool.py) [66] respectively for 20 bp, 25 bp, 30 bp and 35 bp-long fragments and allocated in same manner to  
345 length bins. Further, fragmented genomes were used for specificity testing of each constructed target which allowed to overcome the problem of  
346 very short and non-specific fragments with threshold estimation.

347

### **Verification of specificity and sensitivity of NGS screening method**

348 Due to the lack of available NGS data of positive *M. tuberculosis* cases, we tested in-silico methods by using the Kay et al. (2015) dataset  
349 (PRJEB7454), derived from Hungarian mummies tissue microbiome sequencing. SRA files for each sample were identified and downloaded,  
350 further fastq files passed through trimming with deprivation of the adapter sequences [65]. Raw sequencing files were conducted to human  
351 genome reference sequence (hg19) filtration in spite the fact that host DNA material could be dominant in the sample. Alignment was performed  
352 to the tested targets *M. tuberculosis* H37Rv, Borówka et al., Bos et al., and Bouwman et al. using the AGAT software tool [65]. Statistics for  
353 each individual are presented in Supplementary Table 3. Summarized results of aTB cases from Brześć Kujawski are included in Supplementary  
354 Tables 4-7.

355

## 356 **Statistical processing and parametric testing-based outlier detection algorithm**

357 Collected unmapped sequences from the original dataset, as well as from the Kay et al. dataset, were aligned to constructed marker sequences:  
358 *M. tuberculosis* H37Rv, Borówka et al. (Supplementary Table 10), Bos et al., and Bouwman et al. with application of experimentally determined  
359 minimal read length threshold  $\geq 17$  bp,  $\geq 20$ bp,  $\geq 25$ bp,  $\geq 30$ bp and  $\geq 35$ bp for detection of potential ancient MTBC cases. For detection of outlier  
360 individuals with high microbial load/positive read ratio, we standardised read ratio values to normal distribution parameters (arithmetic mean  
361 and standard deviation) and, as a further step in the aTB detection algorithm, applied a typical cut off value of 1.5xSD to detect outliers,  
362 postulating these to be candidates for active tuberculosis.

363 Based on the observation that positive read ratio tends to depend monotonically on read length bin – either consistently increasing or  
364 decreasing for outlier individuals – we decided to calculate a monotonicity parameter. We first standardised positive read ratios as percentage of  
365 average positive read ratio and then calculated ratios of these values for adjoining read length bins ( $\geq 25$ bp/ $\geq 20$ bp,  $\geq 30$ bp/ $\geq 25$ bp and  
366  $\geq 35$ bp/ $\geq 30$ bp). For outlier detection, we applied a one-tailed critical z value test on both tails of the sample. We consider the positive outliers  
367 (individuals with consistently increasing share of positively aligned reads with increasing read length) to be confirmed ancient tuberculosis  
368 sufferers (See Supplementary tables 3-7).

## 369 **Availability of supporting data and materials**

370 The datasets supporting the conclusions of this article are available under the NCBI repository project "Identification of ancient tuberculosis in  
371 human archaeological remains" (acc. num. PRJNA422903) including Biosamples and related Sequence Read Archive (SRA). Other supporting  
372 data are available via the Gigascience database, GigaDB [67].

## 373 **Additional files**

374 **Borówka\_et\_al\_Supplementary\_Tables.xls**

375 **Borówka\_et\_al\_Supplementary\_Tables\_legends.doc**

376 **Borówka\_et\_al\_Supplementary\_Figures.pdf**

## 377 **Declarations**

### 378 **Abbreviations**

379 **aDNA – Ancient DNA**

380 **aTB – Ancient tuberculosis**

381 **NGS – Next Generation Sequencing**

382 **MTBC – *Mycobacterium Tuberculosis* Complex**

383 **MOTT – Mycobacteria other than tuberculosis**

384 **SRA - Sequence Read Archive**

385

### 386 **Ethics approval and consent to participate**

387 Not applicable.

388

389 **Consent for publication**

390 Not applicable

391

392 **Competing interests**

393 The authors declare that they have no competing interests.

394

395 **Acknowledgments**

396

397 We would like to thank Anna Brzostek for additional laboratory work.

398

399 **Funding**

400 The study was financed by the Polish Ministry of Science and Higher Education grant DIR/WK/2017/01 and by the Polish POPC Grant

401 02.03.01-00-0012/17-00 from the European Regional Development Fund.

402 **Author's contributions**

403 P.B. and D.S. conceived the study, were responsible for extraction of aDNA, preparation of NGS libraries and Next Generation Sequencing of

404 samples. P.B, D.S and Ł.P analyzed the data, discussed the results, and wrote the manuscript. Ł.P. participated in the statistical analysis and

405 figure preparation. B.M wrote and ran AGAT primary analysis. B.B-S. precipitated in sample selection and preparation for laboratory phase.

406 J.D., WL analyzed the samples for pathological changes, participated in the study design, analyzed and discussed the data, and participated in

407 drafting the manuscript. E.Ż. participated in the study design, analyzed and discussed the data, and participated in drafting the manuscript. D.S.

408 coordinated studies and was responsible for the final version of the manuscript; all authors read and approved the final manuscript.

409

410 **References**

- 411 1. Barrett, R., et al., *Emerging and re-emerging infectious diseases: the third epidemiologic transition*. Annual review of anthropology, 1998. **27**(1): p. 247-271.
- 412
- 413 2. Armelagos, G.J. and M.N. Cohen, *Paleopathology at the Origins of Agriculture*. 1984: Academic Press Orlando (FL).
- 414 3. Armelagos, G.J., A.H. Goodman, and K.H. Jacobs, *The origins of agriculture: Population growth during a period of declining health*. Population & Environment, 1991. **13**(1): p. 9-22.
- 415
- 416 4. Weiss, R.A. and A.J. McMichael, *Social and environmental risk factors in the emergence of infectious diseases*. Nature medicine, 2004. **10**(12s): p. S70.
- 417
- 418 5. Ortner, D.J. and W. Putschar, *Identification of Pathological Conditions in Human Skeletal Remains*. Smithsonian Contributions to Anthropology, 1985. **28**.
- 419
- 420 6. Aufderheide, A.C., Rodriguez-Martin, Conrado and O. Langsjoen, *The Cambridge encyclopedia of human paleopathology*. Vol. 478. 1998: Cambridge University Press Cambridge.
- 421
- 422 7. Roberts, C., Buikstra J. E.,, *The bioarcheology of tuberculosis: a global perspective on re-emerging disease*. University Press of Florida, Gainesville, FL, 2003.
- 423
- 424 8. Holloway, K.L., et al., *Skeletal lesions in human tuberculosis may sometimes heal: an aid to palaeopathological diagnoses*. PLoS One, 2013. **8**(4): p. e62798.
- 425
- 426 9. Steinbock, R.T., *Paleopathological diagnosis and interpretation: bone diseases in ancient human populations*. 1976: Charles C Thomas Pub Limited.
- 427
- 428 10. Donoghue, H., et al., *Mycobacterium tuberculosis complex DNA in calcified pleura from remains 1400 years old*. Letters in Applied Microbiology, 1998. **27**(5): p. 265-269.
- 429
- 430 11. Donoghue, H.D., *Palaeomicrobiology of tuberculosis*, in *Paleomicrobiology*. 2008, Springer. p. 75-97.
- 431 12. Donoghue, H.D., *Human tuberculosis-an ancient disease, as elucidated by ancient microbial biomolecules*. Microbes and infection, 2009. **11**(14): p. 1156-1162.
- 432
- 433 13. Redman, J.E., et al., *Mycocerosic acid biomarkers for the diagnosis of tuberculosis in the Coimbra Skeletal Collection*. Tuberculosis (Edinb), 2009. **89**(4): p. 267-77.
- 434
- 435 14. Mark, L., et al., *High-throughput mass spectrometric analysis of 1400-year-old mycolic acids as biomarkers for ancient tuberculosis infection*. Journal of Archaeological Science, 2010. **37**(2): p. 302-305.
- 436
- 437 15. Minnikin, D.E., et al., *The interplay of DNA and lipid biomarkers in the detection of tuberculosis and leprosy in mummies and other skeletal remains*. 2011, Verlag Dr. Friedrich Pfeil.
- 438
- 439 16. Tran, T., et al., *Beyond ancient microbial DNA: nonnucleotidic biomolecules for paleomicrobiology*. Biotechniques, 2011. **50**(6): p. 370-380.
- 440
- 441 17. Masson, M., et al., *Osteological and biomolecular evidence of a 7000-year-old case of hypertrophic pulmonary osteopathy secondary to tuberculosis from neolithic hungary*. PLoS One, 2013. **8**(10): p. e78252.
- 442
- 443 18. Borowska-Strugińska, B., et al., *Mycolic acids as markers of osseous tuberculosis in the Neolithic skeleton from Kujawy region (central Poland)*. AnthropologicAl review, 2014. **77**(2): p. 137-149.
- 444
- 445 19. Gernaey, A.M., et al., *Mycolic acids and ancient DNA confirm an osteological diagnosis of tuberculosis*. Tuberculosis (Edinb), 2001.



- 446 **81**(4): p. 259-65.
- 447 20. Boros-Major, A., et al., *New perspectives in biomolecular paleopathology of ancient tuberculosis: a proteomic approach*. Journal of  
448 Archaeological Science, 2011. **38**(1): p. 197-201.
- 449 21. Harkins, K.M., et al., *Screening ancient tuberculosis with qPCR: challenges and opportunities*. Philos Trans R Soc Lond B Biol Sci,  
450 2015. **370**(1660): p. 20130622.
- 451 22. Campana, M.G., et al., *False positives complicate ancient pathogen identifications using high-throughput shotgun sequencing*. BMC  
452 research notes, 2014. **7**(1): p. 111.
- 453 23. Andam, C.P., et al., *Microbial Genomics of Ancient Plagues and Outbreaks*. Trends Microbiol, 2016. **24**(12): p. 978-990.
- 454 24. Bouwman, A.S. and T.A. Brown, *The limits of biomolecular palaeopathology: ancient DNA cannot be used to study venereal syphilis*.  
455 Journal of Archaeological Science, 2005. **32**(5): p. 703-713.
- 456 25. Tsangaras, K. and A.D. Greenwood, *Museums and disease: using tissue archive and museum samples to study pathogens*. Ann Anat,  
457 2012. **194**(1): p. 58-73.
- 458 26. Müller, R., C.A. Roberts, and T.A. Brown, *Complications in the study of ancient tuberculosis: Presence of environmental bacteria in*  
459 *human archaeological remains*. Journal of Archaeological Science, 2016. **68**: p. 5-11.
- 460 27. Frothingham, R., H.G. Hills, and K.H. Wilson, *Extensive DNA sequence conservation throughout the Mycobacterium tuberculosis*  
461 *complex*. Journal of clinical microbiology, 1994. **32**(7): p. 1639-1643.
- 462 28. Brites, D. and S. Gagneux, *Co-evolution of Mycobacterium tuberculosis and Homo sapiens*. Immunol Rev, 2015. **264**(1): p. 6-24.
- 463 29. Minnikin, D.E., et al., *Molecular biomarkers for ancient tuberculosis*, in *Understanding tuberculosis-deciphering the secret life of the*  
464 *bacilli*. 2012, InTech.
- 465 30. Minnikin, D.E., et al., *Essentials in the use of mycolic acid biomarkers for tuberculosis detection: response to "High-throughput mass*  
466 *spectrometric analysis of 1400-year-old mycolic acids as biomarkers for ancient tuberculosis infection"* by. Journal of Archaeological  
467 Science, 2010. **37**(10): p. 2407-2412.
- 468 31. Donoghue, H.D., *Insights gained from ancient biomolecules into past and present tuberculosis—a personal perspective*. International  
469 Journal of Infectious Diseases, 2017. **56**: p. 176-180.
- 470 32. Donoghue, H.D., et al., *Ancient DNA analysis - An established technique in charting the evolution of tuberculosis and leprosy*.  
471 Tuberculosis (Edinb), 2015. **95 Suppl 1**: p. S140-4.
- 472 33. Spigelman, M. and E. Lemma, *The use of the polymerase chain reaction (PCR) to detect Mycobacterium tuberculosis in ancient*  
473 *skeletons*. International Journal of Osteoarchaeology, 1993. **3**(2): p. 137-143.
- 474 34. Müller, R., C.A. Roberts, and T.A. Brown, *Complications in the study of ancient tuberculosis: non-specificity of IS6110 PCRs*. STAR:  
475 Science & Technology of Archaeological Research, 2015. **1**(1): p. 1-8.
- 476 35. Pääbo, S., *Molecular cloning of ancient Egyptian mummy DNA*. Nature, 1985. **314**(6012): p. 644-645.
- 477 36. Salo, W.L., et al., *Identification of Mycobacterium tuberculosis DNA in a pre-Columbian Peruvian mummy*. Proceedings of the National  
478 Academy of Sciences, 1994. **91**(6): p. 2091-2094.
- 479 37. Hershkovitz, I., et al., *Detection and molecular characterization of 9,000-year-old Mycobacterium tuberculosis from a Neolithic*  
480 *settlement in the Eastern Mediterranean*. PLoS One, 2008. **3**(10): p. e3426.
- 481 38. Mays, S. and G.M. Taylor, *A first prehistoric case of tuberculosis from Britain*. International Journal of Osteoarchaeology, 2003. **13**(4): p.  
482 189-196.
- 483 39. Zink, A.R., W. Grabner, and A.G. Nerlich, *Molecular identification of human tuberculosis in recent and historic bone tissue samples: The*  
484 *role of molecular techniques for the study of historic tuberculosis*. Am J Phys Anthropol, 2005. **126**(1): p. 32-47.
- 485 40. Dziadek, J. and A. Sajduda, *Specificity of insertion sequence-based PCR assays for Mycobacterium tuberculosis complex*. The  
486 International Journal of Tuberculosis and Lung Disease, 2001. **5**(6): p. 569-574.
- 487 41. Teo, H.E. and W.C. Peh, *Skeletal tuberculosis in children*. Pediatric radiology, 2004. **34**(11): p. 853-860.
- 488 42. Kent, L., et al., *Demonstration of homology between IS6110 of Mycobacterium tuberculosis and DNAs of other Mycobacterium spp.?*  
489 Journal of clinical microbiology, 1995. **33**(9): p. 2290-2293.
- 490 43. McHugh, T., L. Newport, and S. Gillespie, *IS6110 homologs are present in multiple copies in mycobacteria other than tuberculosis-*  
491 *causing mycobacteria*. Journal of clinical microbiology, 1997. **35**(7): p. 1769-1771.
- 492 44. Picardeau, M., et al., *Genotypic characterization of five subspecies of Mycobacterium kansasii*. J Clin Microbiol, 1997. **35**(1): p. 25-32.
- 493 45. Picardeau, M., et al., *Mycobacterium xenopi IS1395, a novel insertion sequence expanding the IS256 family*. Microbiology, 1996.  
494 **142**(9): p. 2453-2461.
- 495 46. Savelkoul, P.H., et al., *Detection of Mycobacterium tuberculosis complex with real time PCR: comparison of different primer-probe sets*  
496 *based on the IS6110 element*. Journal of microbiological methods, 2006. **66**(1): p. 177-180.
- 497 47. Rasmussen, S., et al., *Early divergent strains of Yersinia pestis in Eurasia 5,000 years ago*. Cell, 2015. **163**(3): p. 571-82.
- 498 48. Kay, G.L., et al., *Eighteenth-century genomes show that mixed infections were common at time of peak tuberculosis in Europe*. Nature  
499 communications, 2015. **6**.
- 500 49. Chan, J.Z., et al., *Metagenomic analysis of tuberculosis in a mummy*. N Engl J Med, 2013. **369**(3): p. 289-90.
- 501 50. Bos, K.I., et al., *Pre-Columbian mycobacterial genomes reveal seals as a source of New World human tuberculosis*. Nature, 2014.  
502 **514**(7523): p. 494-7.
- 503 51. Bos, K.I., et al., *Parallel detection of ancient pathogens via array-based DNA capture*. Philos Trans R Soc Lond B Biol Sci, 2015.  
504 **370**(1660): p. 20130375.
- 505 52. Bouwman, A.S., et al., *Genotype of a historic strain of Mycobacterium tuberculosis*. Proceedings of the National Academy of Sciences,  
506 2012. **109**(45): p. 18511-18516.
- 507 53. Lorkiewicz, W., et al., *Between the Baltic and Danubian worlds: the genetic affinities of a middle neolithic population from central*  
508 *Poland*. PLoS One, 2015. **10**(2): p. e0118316.
- 509 54. Aziz, R.K., et al., *The RAST Server: rapid annotations using subsystems technology*. BMC Genomics, 2008. **9**(1): p. 75.
- 510 55. Djelouadi, Z., D. Raoult, and M. Drancourt, *Palaeogenomics of Mycobacterium tuberculosis: epidemic bursts with a degrading genome*.  
511 Lancet Infect Dis, 2011. **11**(8): p. 641-50.
- 512 56. Fletcher, H.A., et al., *Widespread occurrence of Mycobacterium tuberculosis DNA from 18th-19th century Hungarians*. American  
513 Journal of Physical Anthropology: The Official Publication of the American Association of Physical Anthropologists, 2003. **120**(2): p.  
514 144-152.
- 515 57. Peto, H.M., et al., *Epidemiology of extrapulmonary tuberculosis in the United States, 1993-2006*. Clinical Infectious Diseases, 2009.  
516 **49**(9): p. 1350-1357.
- 517 58. Ginolhac, A., et al., *mapDamage: testing for damage patterns in ancient DNA sequences*. Bioinformatics, 2011. **27**(15): p. 2153-5.
- 518 59. Jonsson, H., et al., *mapDamage2.0: fast approximate Bayesian estimates of ancient DNA damage parameters*. Bioinformatics, 2013.  
519 **29**(13): p. 1682-4.
- 520 60. Gamba, C., et al., *Genome flux and stasis in a five millennium transect of European prehistory*. Nature communications, 2014. **5**: p.  
521 5257.
- 522 61. Pinhasi, R., et al., *Optimal ancient DNA yields from the inner ear part of the human petrous bone*. PLoS One, 2015. **10**(6): p. e0129102.
- 523 62. Fernandes, D., et al., *A genomic Neolithic time transect of hunter-farmer admixture in central Poland*. Scientific reports, 2018. **8**(1): p.  
524 14879.
- 525 63. Meyer, M. and M. Kircher, *Illumina sequencing library preparation for highly multiplexed target capture and sequencing*. Cold Spring  
526 Harbor Protocols, 2010. **2010**(6): p. pdb. prot5448.
- 527 64. Krueger, F., *Trim Galore!: A wrapper tool around Cutadapt and FastQC to consistently apply quality and adapter trimming to FastQ files*.  
528 2015.
- 529 65. Marciniak, B., P. Borówka, and D. Strapagiel, *AGAT tool - Ancient Genomes Analysis Tool*. 2016.
- 530 66. Marciniak, B., P. Borówka, and D. Strapagiel, *FA\_TOOL-simple command line tool for fasta file editing*. 2016.

531 67. Borówka P, Pułaski L, Marciniak B, Borowska-Strugińska B, Dziadek J, Żądzińska E et al. Supporting data for "Screening methods for  
532 detection of ancient Mycobacterium tuberculosis complex fingerprints in NGS data derived from skeletal samples" GigaScience  
533 Database 2019. <http://dx.doi.org/10.5524/100598>  
534  
535  
536

537 **Tables and Figure legends**

538 Table 1. Number of genomic k-mers from MTBC and MOTT members after initial hg19 clearing step matching selected targets, with k-mer length distinction ( $\geq 20$ bp,  $\geq 25$ bp,  $\geq 30$ bp,  $\geq 35$ bp). with estimation of percentage of  
 539 k-mers from a given mycobacterial genomes matching the *M. tuberculosis* genome for query length  $\geq 30$  and  $\geq 35$ .

540

|                       | k-mer length           | Genome length (bp) | Query length $\geq 20$                                 |             |                |            | Query length $\geq 25$ |                                                        |             |                | Query length $\geq 30$ |                |                                                        |             | Query length $\geq 35$ |            |                |                                                        |             |                |            |                |
|-----------------------|------------------------|--------------------|--------------------------------------------------------|-------------|----------------|------------|------------------------|--------------------------------------------------------|-------------|----------------|------------------------|----------------|--------------------------------------------------------|-------------|------------------------|------------|----------------|--------------------------------------------------------|-------------|----------------|------------|----------------|
|                       | Alignment target       |                    | % of sequences mapped to <i>M. tuberculosis</i> genome | Full genome | Borowka et al. | Bos et al. | Bouwman et al.         | % of sequences mapped to <i>M. tuberculosis</i> genome | Full genome | Borowka et al. | Bos et al.             | Bouwman et al. | % of sequences mapped to <i>M. tuberculosis</i> genome | Full genome | Borowka et al.         | Bos et al. | Bouwman et al. | % of sequences mapped to <i>M. tuberculosis</i> genome | Full genome | Borowka et al. | Bos et al. | Bouwman et al. |
| <b>Species group</b>  |                        |                    |                                                        |             |                |            |                        |                                                        |             |                |                        |                |                                                        |             |                        |            |                |                                                        |             |                |            |                |
|                       | <i>M. leprae</i>       | 3268203            | 3.19%                                                  | 140922      | 19736          | 101        | 1683                   | 4.88%                                                  | 215257      | 4349           | 85                     | 2240           | 2.61%                                                  | 115138      | 1430                   | 26         | 1201           | 1.45%                                                  | 63860       | 543            | 6          | 715            |
| <b>MOTT</b>           | <i>M. abscessus</i>    | 5067172            | 5.26%                                                  | 232228      | 46530          | 158        | 2915                   | 2.87%                                                  | 126769      | 2816           | 103                    | 1890           | 1.39%                                                  | 61160       | 283                    | 46         | 1065           | 0.75%                                                  | 33175       | 62             | 14         | 644            |
|                       | <i>M. smegmatis</i>    | 6988209            | 11.19%                                                 | 493570      | 107339         | 543        | 6917                   | 5.68%                                                  | 250537      | 7793           | 340                    | 2919           | 2.88%                                                  | 127219      | 1187                   | 162        | 1610           | 1.64%                                                  | 72286       | 262            | 65         | 944            |
|                       | <i>M. fortuitum</i>    | 6254616            | 8.48%                                                  | 374030      | 77785          | 291        | 5208                   | 5.22%                                                  | 230382      | 5940           | 131                    | 2774           | 2.69%                                                  | 118483      | 958                    | 40         | 1534           | 1.53%                                                  | 67463       | 236            | 16         | 916            |
|                       | <i>M. phlei</i>        | 5349645            | 8.98%                                                  | 396255      | 88582          | 391        | 5909                   | 6.57%                                                  | 289788      | 9912           | 157                    | 3597           | 3.45%                                                  | 152331      | 1665                   | 97         | 1951           | 2.03%                                                  | 89593       | 377            | 56         | 1176           |
|                       | <i>M. simiae</i>       | 5938797            | 9.33%                                                  | 411677      | 80142          | 339        | 5414                   | 9.51%                                                  | 419641      | 12734          | 197                    | 4578           | 5.35%                                                  | 235800      | 3904                   | 93         | 2702           | 3.15%                                                  | 139050      | 1450           | 33         | 1575           |
|                       | <i>M. asiaticum</i>    | 5910436            | 9.00%                                                  | 396854      | 76829          | 413        | 5597                   | 10.69%                                                 | 471493      | 19780          | 392                    | 5022           | 0.00%                                                  | 265638      | 5366                   | 186        | 2806           | 3.54%                                                  | 156188      | 1531           | 71         | 1706           |
|                       | <i>M. xenopi</i>       | 4434836            | 7.14%                                                  | 314850      | 60482          | 262        | 4336                   | 8.17%                                                  | 360395      | 11534          | 207                    | 4105           | 0.00%                                                  | 200395      | 3233                   | 120        | 2126           | 2.62%                                                  | 115687      | 1060           | 68         | 1235           |
|                       | <i>M. marinum</i>      | 6660144            | 9.48%                                                  | 418304      | 82499          | 466        | 5715                   | 14.08%                                                 | 621166      | 52438          | 707                    | 6366           | 7.88%                                                  | 347459      | 16301                  | 266        | 3465           | 4.49%                                                  | 198076      | 4208           | 88         | 2046           |
|                       | <i>M. ulcerans</i>     | 5805761            | 8.26%                                                  | 364492      | 71682          | 339        | 4800                   | 12.26%                                                 | 540893      | 36626          | 448                    | 5543           | 6.94%                                                  | 306075      | 10994                  | 160        | 3094           | 4.04%                                                  | 178217      | 3088           | 61         | 1886           |
|                       | <i>M. kansasii</i>     | 6402301            | 10.51%                                                 | 463445      | 89051          | 472        | 6353                   | 15.93%                                                 | 702577      | 39990          | 596                    | 7181           | 9.54%                                                  | 420814      | 13458                  | 278        | 4032           | 5.82%                                                  | 256893      | 4132           | 129        | 2373           |
|                       | <i>M. avium</i>        | 4829781            | 8.07%                                                  | 356159      | 71620          | 322        | 5128                   | 12.08%                                                 | 532953      | 16610          | 194                    | 5331           | 7.31%                                                  | 322606      | 4752                   | 110        | 3271           | 4.58%                                                  | 202232      | 1475           | 65         | 2095           |
| <i>M. haemophilum</i> | 4235765                | 7.08%              | 312375                                                 | 52214       | 274            | 4137       | 13.05%                 | 575862                                                 | 22641       | 540            | 6284                   | 7.98%          | 352034                                                 | 8023        | 374                    | 3703       | 4.94%          | 217744                                                 | 2893        | 254            | 2322       |                |
| <b>MTBC</b>           | <i>M. caprae</i>       | 4288871            | 17.53%                                                 | 773238      | 181627         | 598        | 9935                   | 94.85%                                                 | 4184378     | 734742         | 2306                   | 37814          | 96.27%                                                 | 4245996     | 725608                 | 2253       | 35935          | 96.21%                                                 | 4244109     | 713211         | 2214       | 34394          |
|                       | <i>M. microti</i>      | 4370115            | 17.81%                                                 | 785606      | 188016         | 825        | 10498                  | 96.71%                                                 | 4266542     | 772527         | 3989                   | 40576          | 98.17%                                                 | 4330722     | 771950                 | 3873       | 38507          | 98.12%                                                 | 4328596     | 758572         | 3785       | 36841          |
|                       | <i>M. africanum</i>    | 4389314            | 17.87%                                                 | 788161      | 186939         | 850        | 10494                  | 97.15%                                                 | 4285645     | 764554         | 4038                   | 40740          | 98.63%                                                 | 4350937     | 764150                 | 3893       | 38685          | 98.60%                                                 | 4349503     | 751103         | 3796       | 37018          |
|                       | <i>M. bovis</i>        | 4345492            | 17.72%                                                 | 781857      | 184148         | 592        | 10161                  | 96.31%                                                 | 4248729     | 750458         | 2304                   | 39042          | 97.79%                                                 | 4313964     | 749050                 | 2252       | 36990          | 97.76%                                                 | 4312566     | 735993         | 2213       | 35367          |
|                       | <i>M. tuberculosis</i> | 4411532            | 18.07%                                                 | 797099      | 192022         | 833        | 10844                  | 98.41%                                                 | 4341179     | 791071         | 3947                   | 42253          | 99.97%                                                 | 4410355     | 792717                 | 3851       | 40180          | 100.00%                                                | 4411458     | 779771         | 3777       | 38435          |

541

542 Table 2. Number of reads (per individual) used for alignment and statistical processing.

543

| Sample ID | Raw reads | Trimmed reads | Average read length | Non-human reads | Non-human reads | Non-human reads | Non-human reads |
|-----------|-----------|---------------|---------------------|-----------------|-----------------|-----------------|-----------------|
|-----------|-----------|---------------|---------------------|-----------------|-----------------|-----------------|-----------------|

|         |          |          |      | (>20)    | (>25)    | (>30)    | (>35)    |
|---------|----------|----------|------|----------|----------|----------|----------|
| 1_BK4   | 17507911 | 17038725 | 57.6 | 16977024 | 16902603 | 16378765 | 15191086 |
| 4_BK4   | 18816573 | 18215498 | 51.7 | 18095660 | 17960494 | 17086604 | 15246279 |
| 6_BK4   | 16322105 | 15815995 | 55.0 | 15551094 | 15427193 | 14682610 | 13220243 |
| 7_BK4   | 2231650  | 2160395  | 59.7 | 2102955  | 2095297  | 2047913  | 1936435  |
| 9_BK4   | 14974057 | 14503433 | 53.5 | 14240738 | 14085752 | 13149549 | 11600503 |
| 11A_BK4 | 16432267 | 16000777 | 58.0 | 15766313 | 15695767 | 15172161 | 14034604 |
| 11B_BK4 | 18522995 | 18078222 | 55.7 | 725913   | 718941   | 674747   | 597601   |
| 12_BK4  | 23116936 | 22273434 | 55.6 | 21272850 | 21151065 | 20156692 | 18073071 |
| 14_BK4  | 17849685 | 17383629 | 58.8 | 17310864 | 17235014 | 16752835 | 15595926 |
| 15_BK4  | 16062102 | 15607381 | 58.2 | 15539859 | 15460941 | 14915585 | 13881414 |
| 17_BK4  | 14980797 | 14496468 | 58.1 | 14426404 | 14372805 | 14078235 | 13247545 |
| 18_BK4  | 24217412 | 23575201 | 59.1 | 23370869 | 23281268 | 22704123 | 21306454 |
| 21_BK4  | 11890953 | 11500254 | 60.1 | 11271958 | 11237968 | 11021676 | 10439448 |
| 22_BK4  | 17996717 | 17498339 | 58.8 | 17417850 | 17365274 | 17013067 | 16007094 |
| 25_BK4  | 17560698 | 16997518 | 57.7 | 16888515 | 16816770 | 16375850 | 15237575 |
| 29_BK4  | 8994172  | 8724285  | 58.1 | 8683928  | 8642230  | 8393680  | 7800006  |
| 31_BK4  | 20427813 | 19941632 | 58.4 | 19741741 | 19684774 | 19309226 | 18187574 |
| 32_BK4  | 35100769 | 33926405 | 54.9 | 33754943 | 33623260 | 32780233 | 30194531 |
| 33_BK4  | 24501712 | 23719299 | 58.3 | 21669095 | 21595959 | 21031538 | 19569420 |
| 34_BK4  | 16453473 | 16047224 | 57.3 | 14901123 | 14842998 | 14421402 | 13376818 |
| 47_BK4  | 18736966 | 18155651 | 55.6 | 17998648 | 17903991 | 17174561 | 15478180 |
| 55_BK4  | 17435264 | 16904284 | 48.0 | 16768595 | 16530082 | 14886541 | 12170210 |
| 65_BK3  | 17465925 | 16921732 | 50.6 | 16735483 | 16587671 | 15466034 | 13185810 |
| 71_BK4  | 17919758 | 17434181 | 50.4 | 17086979 | 17017135 | 16549441 | 15441174 |
| 72_BK4  | 16355009 | 15952974 | 57.9 | 15874302 | 15812384 | 15444022 | 14541576 |
| 73_BK4  | 17050731 | 16578547 | 57.8 | 16270896 | 16212738 | 15778509 | 14632126 |
| 77_BK4  | 14044420 | 13478859 | 56.0 | 13390126 | 13322735 | 12866845 | 11763625 |
| 78_BK4  | 17004599 | 16352717 | 60.1 | 16250859 | 16164585 | 15758397 | 15027226 |

544

545

546

547

548 **Fig 1. Changes in standardised ratio values in different read length bins and targets (red diamonds - outliers in *Mycobacterium***  
549 ***tuberculosis* H37Rv and Borówka et al. targets in bin of reads equal or longer than 30).**

550

551 **Fig 2. Comparison of alignment targets constructed with different assumptions (red diamonds indicate outliers in *Mycobacterium***  
552 ***tuberculosis* H37Rv and Borówka et al. targets in bin of reads equal or longer than 35).**

553

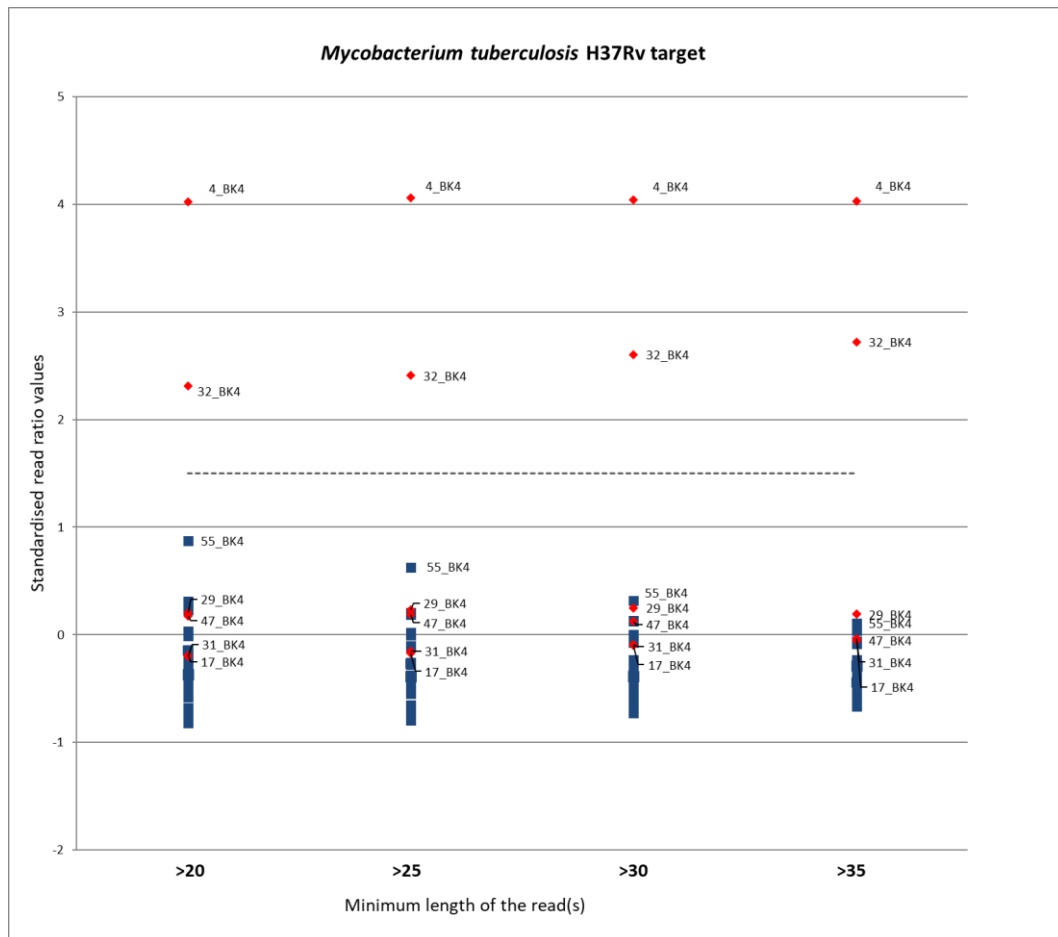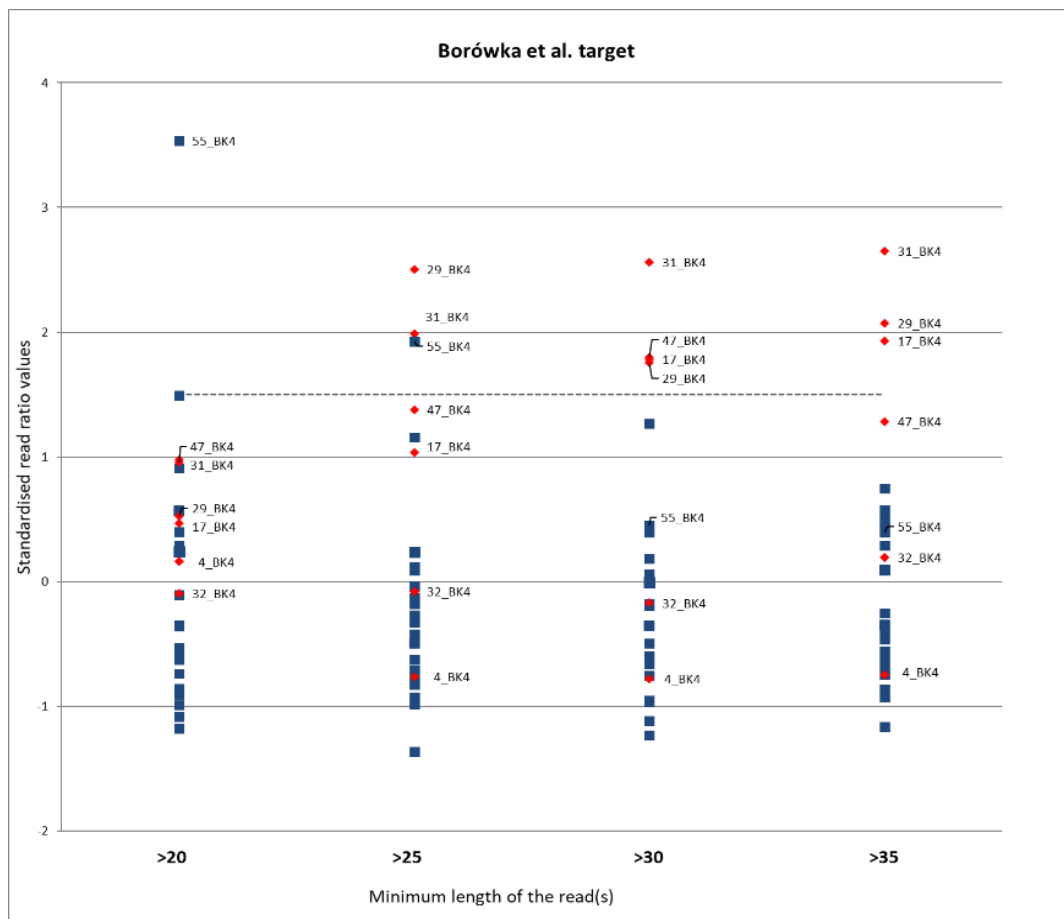

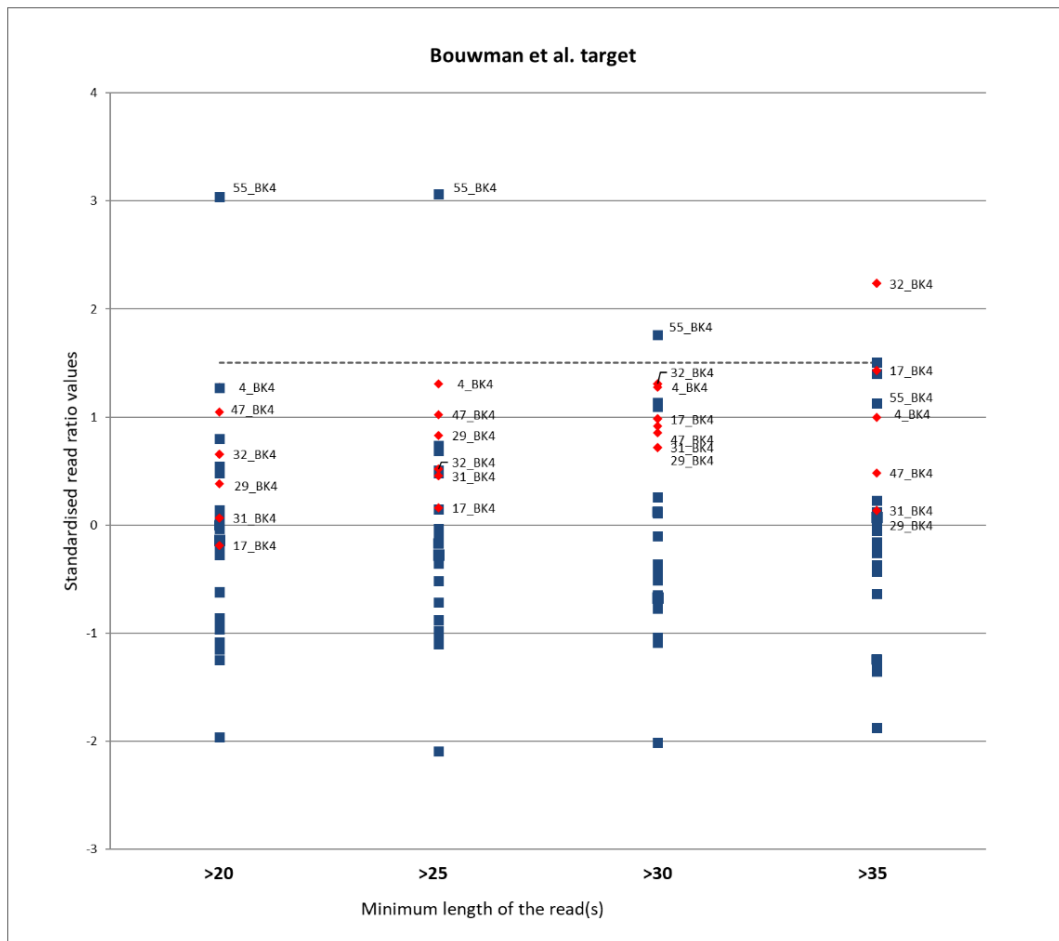

**Fig 1.** Changes in standardized ratio values in different read length bins and targets (red diamonds – outliers in *Mycobacterium tuberculosis* H37Rv and Borówka et al. targets in bin of reads equal or longer than 30). Dotted line present cutoff values based on  $1.5 \times SD$ .

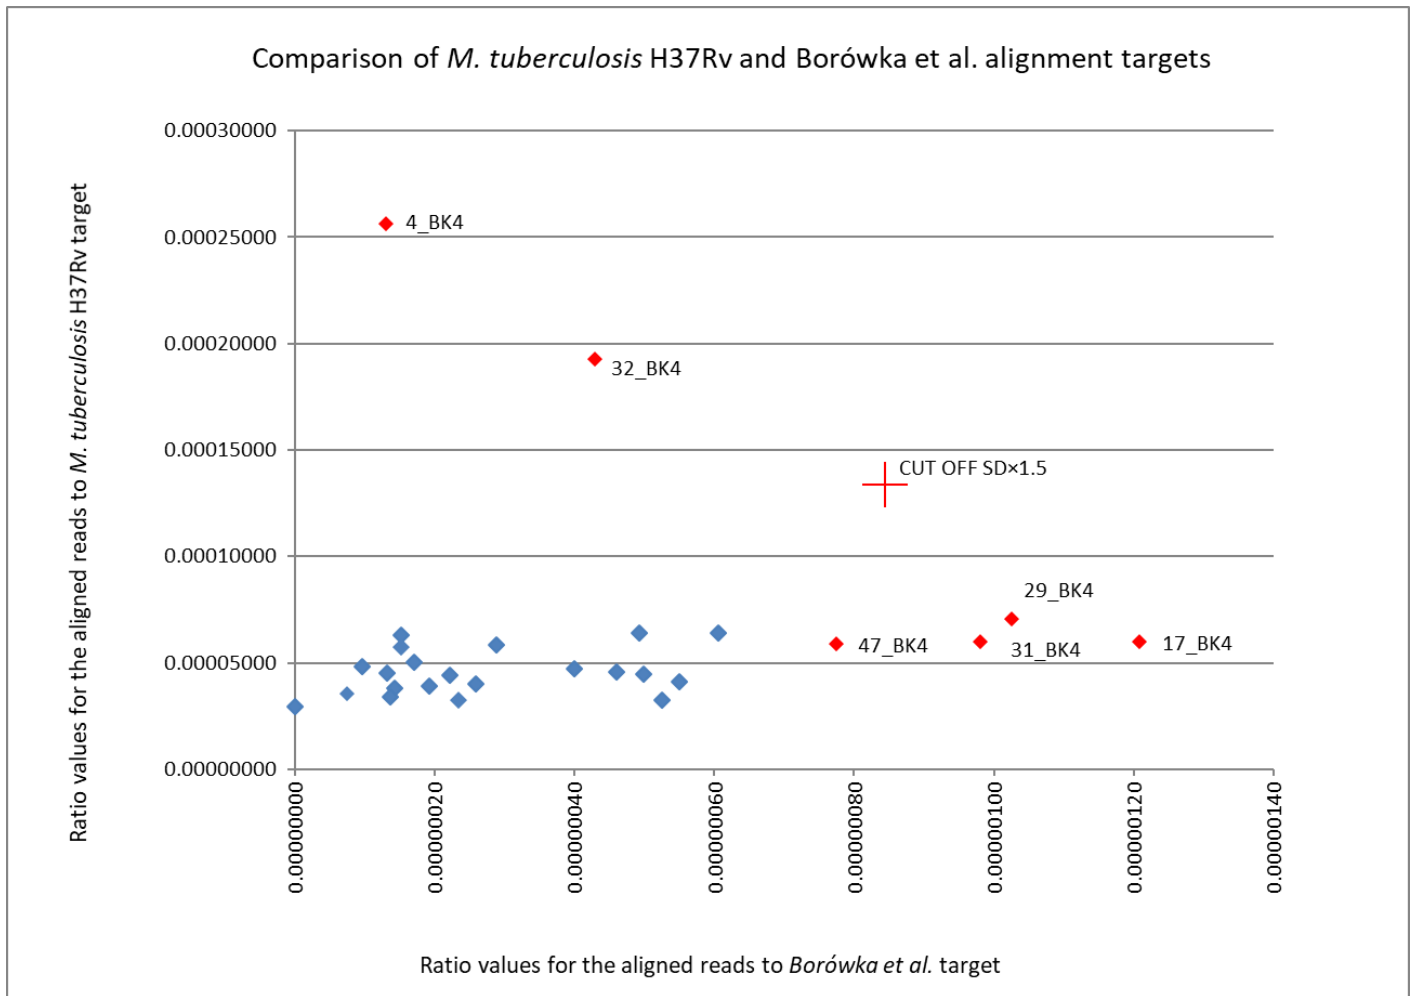

**Fig 2.** Comparison of alignment targets constructed with different assumptions (red diamonds indicate outliers in *Mycobacterium tuberculosis* H37Rv and Borówka et al. targets in bin of reads equal or longer than 35).





Click here to access/download  
**Supplementary Material**  
renamed\_c76da.docx





Click here to access/download  
**Supplementary Material**  
renamed\_9c49f.xlsx



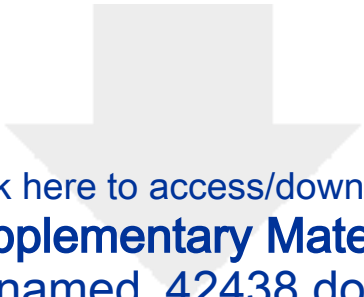

Click here to access/download  
**Supplementary Material**  
renamed\_42438.docx



Lodz, 7<sup>th</sup> of April, 2019

Dear GigaScience Editor,

We appreciate the insightful and detailed comments of the reviewers. We included all the minor language-related corrections in the resubmitted manuscript. Following is a point-by-point reply to the major points raised by the reviewers.

#### Reviewer 1

1. Our statistical approach, as we state directly in the manuscript, is aimed at finding positive outliers in a pool of samples with unknown presence of mycobacterial sequences. When applied to a dataset like Kay et al., which consists exclusively of individuals with previously confirmed ancient mycobacterial infection, its outcome is therefore necessarily limited to identifying the outliers with highest microbial load (in the case of tuberculosis, potentially those individuals who died during the active phase of the disease) - these outliers being by definition always a minority of analysed samples. This explanation is provided in the text of the manuscript.

2. We have performed the MapDamage analysis suggested by the reviewer and it indeed yielded a positive result - we thank the reviewer for this suggestion as this strengthened our conclusions significantly. We have now included a new Supplementary Fig. 4, and we have reworded both the legend to Supplementary Fig. 3 and the sentences in the manuscript that refer to it.

3. Libraries were build using Meyer et al. (2010) protocol with modifications proposed by Gamba et al. (2014). We have performed mapDamage analysis in the way which fit to double stranded libraries. Information about different Meyer protocol and single stranded libraries was incorrectly added to previous version of the manuscript.

4. We have expanded Supplementary Tab. 2 to include the absolute numbers of reads - both total and aligning to each alignment target.

#### Reviewer 2

1. We have now expanded the analysis of state of the art in biochemical detection of ancient mycobacteria by citing recent articles mentioning improvements in cell wall component analysis.

2. Indeed, Pott's disease is usually regarded as pathognomonic signature of TB. When we said that many pathological conditions of the spine can mimic Pott's disease thought that they can be diagnosed mistakenly as tuberculosis, especially in practice with poorly preserved skeletons. The present text has been appropriately modified (both in the Introduction and Discussion) to clarify this statement. Moreover, according to the Reviewer's suggestion, the list of pathological conditions has been replaced with the Table S1, which include a short description of basic differences between these lesions and bone tuberculosis.

Dear Editor, regarding to your comment:

"As your revised manuscript focuses more on a method, it may be more suitable as a "Technical Note" rather than a "research article" "

We would like to proceed this manuscript as research paper. In our work we present original dataset which allow us to present a novel bioinformatical approach, used for screening of ancient tuberculosis in sequencing data, derived from 28 individuals (dated 4400 - 4000 BC and 3100 - 2900 BC) from Central Poland. That dataset was not previously published elsewhere.

Sincerely,

Dominik Strapagiel
